# Supplementary material for: Pd(ii) NCSe–pincer complexes for regioselective cross-dehydrogenative coupling of arylthiophenes with hetero(arenes)
Source: Royal Society of Chemistry journal article supplement (doi:10.1039/d4cy01198h), 2024-12-06
Supplement: d4cy01198h1.pdf [file d4cy01198h1.pdf]

Electronic Supplementary Information for

**Pd(II) NCSe-Pincer Complexes for Regioselective Cross-Dehydrogenative  
Coupling of Arylthiophenes with Hetero(arenes)**

Sohan Singh,<sup>a</sup> Suman Mahala,<sup>a</sup> Nattamai Bhuvanesh,<sup>b</sup> Dr. Hemant Joshi\*<sup>a</sup>

<sup>[a]</sup>ISC Laboratory, Department of Chemistry, School of Chemical Sciences and Pharmacy,  
Central University of Rajasthan, NH-8, Bandarsindri, Ajmer, Rajasthan 305817, India

<sup>[b]</sup>Department of Chemistry, Texas A&M University, PO Box 30012, College Station, Texas  
77842-3012, USA

## General Information:

Standard Schlenk line techniques were used for synthesizing new ligands **L1-L2** and complexes **C1-C2**. The AR grade solvents like acetone (for washing glassware and plasticware), acetonitrile, DCM, MeOH, EtOH, DMF, CHCl<sub>3</sub>, Ethyl acetate, DMSO, Toluene, and acetic acid were used as purchased. Chemicals such as Pd(CH<sub>3</sub>CN)<sub>2</sub>Cl<sub>2</sub>, KBr for FTIR, Cu(OAc)<sub>2</sub>·H<sub>2</sub>O, NaBH<sub>4</sub>, 1-adamantyl amine, and CDCl<sub>3</sub> (for NMR spectroscopy) were purchased from Sigma-Aldrich. In contrast, PhSeSePh, thiophene derivatives, phenylboronic acid derivatives, and heteroarenes derivatives were purchased from TCI chemicals. 3-hydroxybenzaldehyde, K<sub>2</sub>CO<sub>3</sub>, Et<sub>3</sub>N, (CH<sub>3</sub>)<sub>3</sub>CNH<sub>2</sub>, Ag<sub>2</sub>O, AgNO<sub>3</sub>, Ag<sub>2</sub>CO<sub>3</sub>, and AgOAc were purchased from Spectrochem Chemicals. All other reagents for catalysis reaction were purchased from local commercial sources and used as they are. <sup>1</sup>H NMR and <sup>13</sup>C{<sup>1</sup>H}NMR were recorded in a standard capped NMR tube at room temperature using Bruker 500 MHz spectrometers in CDCl<sub>3</sub> solvent. The <sup>1</sup>H internal residual and <sup>13</sup>C{<sup>1</sup>H} peaks were at 7.260 (s) ppm and 77.00 (t) ppm. The abbreviations denoted in NMR spectrums are s, d, dd, t, and m: singlet, doublet, double doublet, triplet, and multiplet. In NMR data interpretation, *J* stands for coupling constant, expressed in Hertz. In contrast, chemical shift δ is expressed in terms of parts per million concerning TMS as an internal reference. As needed, the silica gel used for column chromatography was 60-120 and 240-400 mesh size. The Ocean Optics UV-spectrometer was used for the UV-visible experiments at room temperature using a transparent cuvette with a length of 1 cm. The Perkin-Elmer FTIR instrument was used to perform the IR experiments using KBr pallets for paste formation, mortal-pastel, and diset. The melting point of solid compounds was determined by the Buchi melting point apparatus using a one-sided sealed melting point capillary. The HRMS data were obtained by using Agilent Technologies 6545 Q-TOF LC/MS instrument. The single-crystal X-ray diffraction studies used a BRUKER Quest X-ray (fixed-Chi geometry) diffractometer. The reaction status was monitored by TLC using 0.25 mm silica gel 60-F254 and a UV chamber having 254 nm and 395 nm lamps. The PhSeCH<sub>2</sub>Cl was prepared using earlier reported literature procedure.<sup>s1</sup>

## X-Ray Crystallography:

The single crystals of palladium pincer complexes **C1** and **C2** suitable for X-ray diffraction were grown by the slow evaporation of DCM: CH<sub>3</sub>CN solution at room temperature. Fine crystals of **C1** and **C2** were obtained as brown blocks and colorless blocks, respectively. A Leica MZ 7<sub>5</sub> microscope was used to identify the suitable crystals with well-defined faces with dimensions (max, intermediate, and min) 0.082 x 0.034 x 0.023 and 0.107 x 0.062 x 0.041 mm<sup>3</sup> for complexes **C1** and **C2**, respectively. The crystal mounted on a nylon loop was placed in a cold nitrogen stream (Oxford) maintained at 110 K. The X-ray diffraction studies (crystal screening, unit cell determination, and data collection) were done by a BRUKER Venture X-ray (kappa geometry) diffractometer for complexes **C1** and **C2**. The goniometer was controlled using the APEX3 software suite.<sup>s2</sup> The sample was optically centered with a video camera, so no translations were observed as the crystal was rotated through all positions. The X-ray radiation employed was generated from a Cu-I $\mu$ s X-ray tube ( $K_{\alpha} = 1.5418\text{\AA}$  with a potential of 50 kV and a current of 1.0 mA). The data collected from crystallography were tabulated in **Tables s1-s4**. The cell parameters obtained from 45 data frames were taken at widths of 1 $^{\circ}$  scan and refined with reflections 40574 and 53876, which were used for **C1** and **C2**, respectively, to determine the unit cell. The unit cell was verified by examining several data frames *h k l* overlays. No super-cell or erroneous reflections were observed. After careful examination of the unit cell, an extended data collection procedure (28 and 38 sets for **C1** and **C2**, respectively) was initiated using omega and phi scans. Integrated intensity information for each reflection was obtained by reducing the data frames with the APEX3.<sup>s2</sup> The integration method employed a three-dimensional profiling algorithm, and all data were corrected for Lorentz and polarization factors and crystal decay effects. Finally, the data was merged and scaled to produce a suitable data set. The absorption correction program SADABS<sup>s3</sup> was employed to correct the data for absorption effects. Systematic reflection conditions and statistical tests of the data suggested the space group *P-1* and *P2<sub>1</sub>/c* of **C1** and **C2**, respectively. A solution was obtained readily (*Z*=4, *Z'*=2, and *Z*=4 for **C1** and **C2**, respectively) using XT/XS in APEX3.<sup>s2, s4</sup> Hydrogen atoms were placed in idealized positions and were set riding on the

respective parent atoms. All non-hydrogen atoms were refined with anisotropic thermal parameters. The absence of additional symmetry or voids was confirmed using PLATON (ADDSYM).<sup>s5</sup> The structure was refined (weighted almost minor squares refinement $F^2$ ) to convergence.<sup>s4,s6</sup> Olex2 was employed for the final data presentation, and structure plots<sup>s6</sup> Appropriate restraints and constraints were added to keep the bond distances and thermal ellipsoids meaningful. In **C1** and **C2**, the final refinements were set with the same restraint (chemical meaningfulness), which was refined to 6695 / 0 / 421 and 4150 / 0 / 262 for **C1** and **C2**, respectively. The complex **C1** crystallized with two independent molecules in the unit cell (Figure s1). In complex **C1**, the unit cell has four molecules ( $Z=4$ ) in which one set of molecules is non-equivalent to the other ( $Z'=2$ ) (Figures s2), whereas, in complex **C2**, the unit cell has four molecules, which are equivalent (Figures s3).

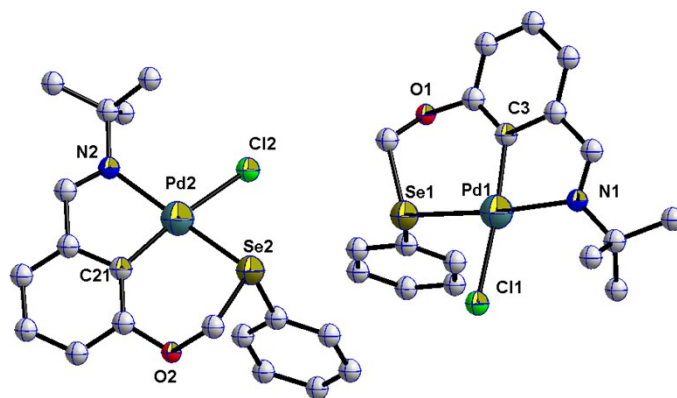

**Figure s1:** Molecular structure of **C1** showing two independent molecules in the unit cell.

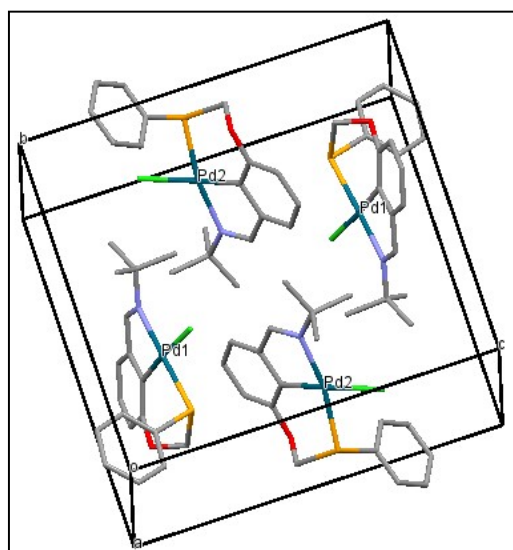

**Figure s2:** The Unit cell diagram of **C1**.

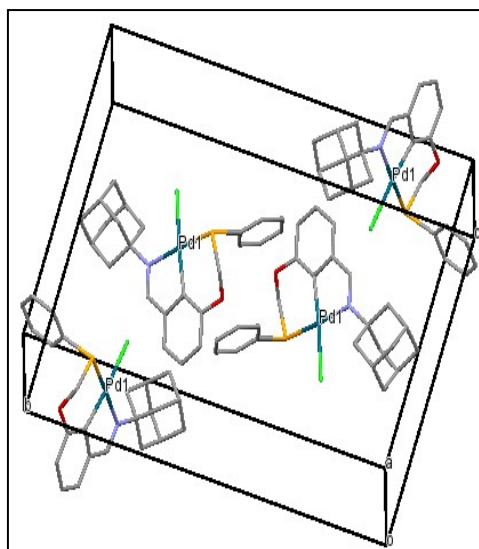

**Figure s3:** The Unit cell diagram of **C2**.

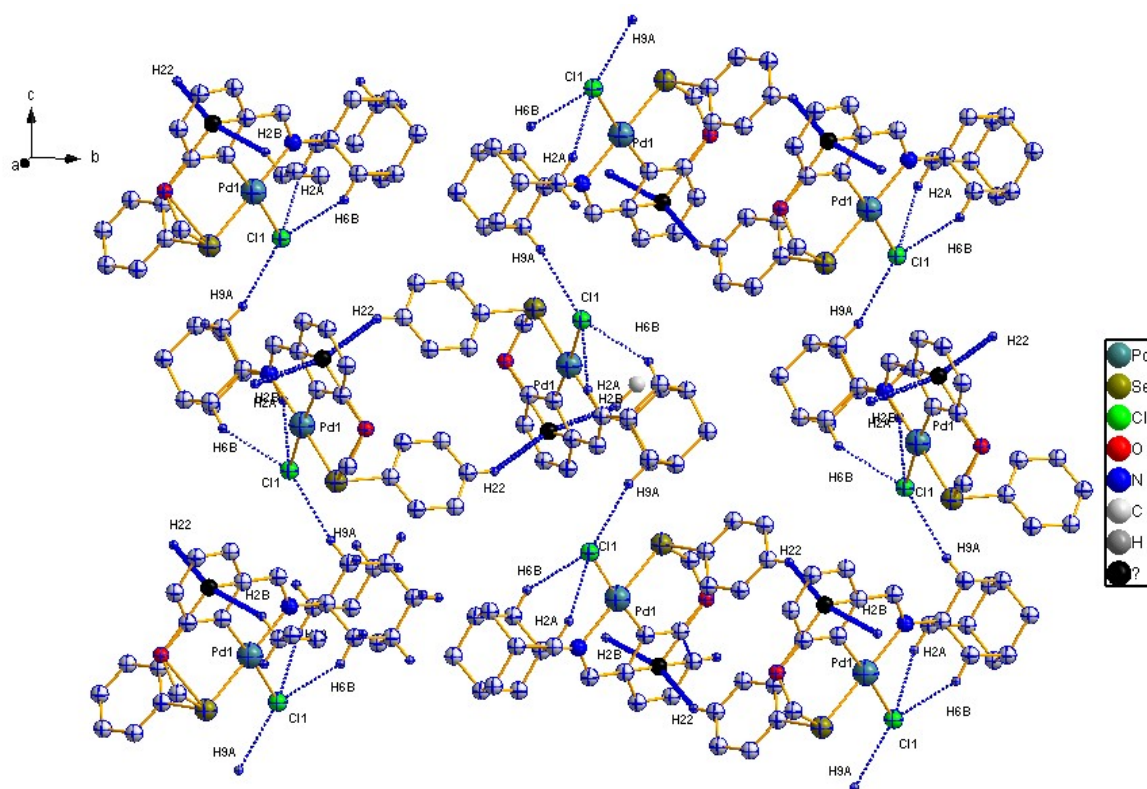

**Figure s4:** Packing diagram showing non-covalent Interaction in complex **C2**.

**Table s1:** Summary of key crystallographic data:

|                                                                | <b>C1</b>                                                     | <b>C2</b>                                                   |
|----------------------------------------------------------------|---------------------------------------------------------------|-------------------------------------------------------------|
| identification code                                            | hjss202                                                       | hjss116                                                     |
| empirical formula                                              | C18 H20 Cl N O Pd Se                                          | C24 H26 Cl N O Pd Se                                        |
| formula weight                                                 | 487.16                                                        | 565.27                                                      |
| temperature [K]                                                | 110.00 K                                                      | 110.00 K                                                    |
| wavelength [Å]                                                 | 1.54178 Å                                                     | 1.54178 Å                                                   |
| crystal system                                                 | Triclinic                                                     | Monoclinic                                                  |
| space group                                                    | <i>P</i> -1                                                   | P 1 21/c 1                                                  |
| Unit cell dimensions:                                          |                                                               |                                                             |
| <i>A</i> [Å]                                                   | 9.2684(3)                                                     | 6.7272(5)                                                   |
| <i>b</i> [Å]                                                   | 13.6019(4)                                                    | 20.8455(15)                                                 |
| <i>c</i> [Å]                                                   | 14.1589(5)                                                    | 15.5747(11)                                                 |
| $\alpha$ [°]                                                   | 86.5300(10)                                                   | 90                                                          |
| $\beta$ [°]                                                    | 85.3220(10)                                                   | 90                                                          |
| $\gamma$ [°]                                                   | 82.6850(10)                                                   | 90                                                          |
| <i>V</i> [Å <sup>3</sup> ]                                     | 1762.29(10) Å <sup>3</sup>                                    | 2182.2(3) Å <sup>3</sup>                                    |
| <i>Z</i>                                                       | 4                                                             | 4                                                           |
| $\rho_{\text{calc}}$ [Mg/m <sup>3</sup> ]                      | 1.836 Mg/m <sup>3</sup>                                       | 1.721 Mg/m <sup>3</sup>                                     |
| $\mu$ [mm <sup>-1</sup> ]                                      | 12.268 mm <sup>-1</sup>                                       | 10.007 mm <sup>-1</sup>                                     |
| F(000)                                                         | 960                                                           | 1128                                                        |
| crystal size [mm <sup>3</sup> ]                                | 0.082 x 0.034 x 0.023 mm <sup>3</sup>                         | 0.107 x 0.062 x 0.041 mm <sup>3</sup>                       |
| $\theta$ limit [°]                                             | 3.136 to 70.176°.                                             | 3.544 to 70.247°.                                           |
| Index ranges ( <i>h</i> , <i>k</i> , <i>l</i> )                | -10 ≤ <i>h</i> ≤ 11, -16 ≤ <i>k</i> ≤ 16, -17 ≤ <i>l</i> ≤ 17 | -8 ≤ <i>h</i> ≤ 8, -25 ≤ <i>k</i> ≤ 25, -18 ≤ <i>l</i> ≤ 17 |
| reflections collected                                          | 40574                                                         | 53876                                                       |
| independent reflections                                        | 6695                                                          | 4150                                                        |
| <i>R</i> (int)                                                 | 0.0401                                                        | 0.0481                                                      |
| completeness to $\theta$                                       | 99.8 %                                                        | 99.9 %                                                      |
| absorption correction                                          | Semi-empirical from equivalents                               | Semi-empirical from equivalents                             |
| max. and min. transmission                                     | 0.3841 and 0.2130                                             | 0.4684 and 0.3162                                           |
| refinement method                                              | Full-matrix least-squares on F <sup>2</sup>                   | Full-matrix least-squares on F <sup>2</sup>                 |
| data/restraints/parameters                                     | 6695 / 0 / 421                                                | 4150 / 0 / 262                                              |
| Goodness-of-fit on F <sup>2</sup>                              | 1.056                                                         | 1.170                                                       |
| <i>R</i> indices (final) [ <i>I</i> > 2 $\sigma$ ( <i>I</i> )] |                                                               |                                                             |
| <i>R</i> 1                                                     | 0.0194                                                        | 0.0210                                                      |
| <i>wR</i> 2                                                    | 0.0513                                                        | 0.0512                                                      |
| <i>R</i> indices (all data)                                    |                                                               |                                                             |
| <i>R</i> 1                                                     | 0.0197                                                        | 0.0212                                                      |
| <i>wR</i> 2                                                    | 0.0516                                                        | 0.0513                                                      |
| Extinction coefficient                                         | na                                                            | na                                                          |
| Largest diff. Peak and hole [eÅ <sup>-3</sup> ]                | 0.474 and -0.773 e.Å <sup>-3</sup>                            | 0.505 and -0.338 e.Å <sup>-3</sup>                          |

**Table s2:** Some selected bond angles of complexes **C1** and **C2**.

| <b>C1</b>          |                   |                    |                   | <b>C2</b>          |                   |
|--------------------|-------------------|--------------------|-------------------|--------------------|-------------------|
| <b>Bond Angles</b> | <b>Values (°)</b> | <b>Bond Angles</b> | <b>Values (°)</b> | <b>Bond Angles</b> | <b>Values (°)</b> |
| Se(1)-Pd(1)-Cl(1)  | 81.862(14)        | Se(2)-Pd(2)-Cl(2)  | 83.781(13)        | C17-Pd1-Cl1        | 175.26            |
| N(1)-Pd(1)-Se(1)   | 173.91(5)         | N(2)-Pd(2)-Se(2)   | 166.69(4)         | Se1-Pd1-N1         | 173.81            |
| N(1)-Pd(1)-Cl(1)   | 102.42(5)         | N(2)-Pd(2)-Cl(2)   | 102.57(5)         | C17-Pd1-Se1        | 93.96             |
| C(3)-Pd(1)-Se(1)   | 93.90(6)          | C(21)-Pd(2)-Se(2)  | 94.05(6)          | C17-Pd1-N1         | 81.71             |
| C(3)-Pd(1)-Cl(1)   | 175.29(6)         | C(21)-Pd(2)-Cl(2)  | 169.95(6)         | Cl1-Pd1-Se1        | 82.20             |
| C(3)-Pd(1)-N(1)    | 81.65(8)          | C(21)-Pd(2)-N(2)   | 81.64(7)          | Cl1-Pd1-N1         | 102.32            |
| C(1)-Se(1)-Pd(1)   | 104.00(6)         | C(19)-Se(2)-Pd(2)  | 102.62(6)         | C17-Pd1-Cl1        | 175.26            |
| C(9)-Se(1)-Pd(1)   | 104.38(7)         | C(27)-Se(2)-Pd(2)  | 108.74(6)         |                    |                   |
| C(8)-N(1)-Pd(1)    | 110.82(14)        | C(20)-C(21)-Pd(2)  | 131.42(15)        |                    |                   |
| C(15)-N(1)-Pd(1)   | 128.64(13)        | C(22)-C(21)-Pd(2)  | 112.18(14)        |                    |                   |
| C(2)-C(3)-Pd(1)    | 132.73(16)        | C(26)-N(2)-Pd(2)   | 111.38(13)        |                    |                   |
| C(4)-C(3)-Pd(1)    | 111.50(15)        | C(33)-N(2)-Pd(2)   | 127.94(12)        |                    |                   |

**Table s3:** Some selected bond lengths of Complexes **C1** and **C2**.

| <b>C1</b>          |                  |                    |                  | <b>C2</b>          |                  |
|--------------------|------------------|--------------------|------------------|--------------------|------------------|
| <b>Bond length</b> | <b>Values(Å)</b> | <b>Bond length</b> | <b>Values(Å)</b> | <b>Bond length</b> | <b>Values(Å)</b> |
| Pd(1)-Se(1)        | 2.3679(3)        | Pd(2)-Se(2)        | 2.3702(2)        | Pd(1)-Se(1)        | 2.3682(3)        |
| Pd(1)-Cl(1)        | 2.4106(5)        | Pd(2)-Cl(2)        | 2.4114(5)        | Pd(1)-Cl(1)        | 2.4142(6)        |
| Pd(1)-N(1)         | 2.1192(17)       | Pd(2)-N(2)         | 2.1215(16)       | Pd(1)-N(1)         | 2.1057(18)       |
| Pd(1)-C(3)         | 2.005(2)         | Pd(2)-C(21)        | 1.994(2)         | Pd(1)-C(17)        | 2.005(2)         |
| Se(1)-C(1)         | 1.964(2)         | Se(2)-C(19)        | 1.971(2)         | Se(1)-C(18)        | 1.967(2)         |
| Se(1)-C(9)         | 1.933(2)         | Se(2)-C(27)        | 1.924(2)         | Se(1)-C(19)        | 1.926(2)         |
| O(1)-C(1)          | 1.397(3)         | O(2)-C(19)         | 1.403(2)         | O(1)-C(16)         | 1.395(3)         |
| O(1)-C(2)          | 1.399(3)         | O(2)-C(20)         | 1.395(2)         | O(1)-C(18)         | 1.395(3)         |
| N(1)-C(8)          | 1.286(3)         | N(2)-C(26)         | 1.284(3)         | N(1)-C(1)          | 1.483(3)         |
| N(1)-C(15)         | 1.494(3)         | N(2)-C(33)         | 1.494(2)         | N(1)-C(11)         | 1.285(3)         |

**Table s4:** Bond parameters related to non-covalent interactions in complexes **C1-C2** (bond distances in Å)

| <b>C1</b> |                                     |                                  | <b>C2</b> |                                    |                                  |
|-----------|-------------------------------------|----------------------------------|-----------|------------------------------------|----------------------------------|
| SR.No.    | Interaction                         | D <sub>Atom 1...Atom 2</sub> (Å) | SR.No.    | Interaction                        | D <sub>Atom 1...Atom 2</sub> (Å) |
| 1.        | Cl <sub>1</sub> ...H <sub>18c</sub> | 2.730(1)                         | 1.        | Cl <sub>1</sub> ...H <sub>6B</sub> | 2.633(0)                         |
| 2.        | Cl <sub>1</sub> ...H <sub>16A</sub> | 2.588(1)                         | 2.        | Cl <sub>1</sub> ...H <sub>2A</sub> | 2.595(0)                         |
| 3.        | Cl <sub>1</sub> ...H <sub>36A</sub> | 2.886(1)                         | 3.        | Cl <sub>1</sub> ...H <sub>9A</sub> | 2.769(0)                         |
| 4.        | Cl <sub>2</sub> ...H <sub>34A</sub> | 2.616(0)                         | 4.        | CH <sub>22</sub> ...π              | 2.637(0)                         |
| 5.        | Cl <sub>2</sub> ...H <sub>35c</sub> | 2.701(1)                         | 5.        | CH <sub>2B</sub> ...π              | 2.606(0)                         |
| 6.        | Cl <sub>2</sub> ...H <sub>19A</sub> | 2.874(1)                         |           |                                    |                                  |

|    |                                     |          |  |  |  |
|----|-------------------------------------|----------|--|--|--|
| 7. | Cl <sub>2</sub> ····H <sub>1A</sub> | 2.699(1) |  |  |  |
| 8. | CH <sub>16C</sub> ····π             | 2.648(0) |  |  |  |

### Spectroscopic Data (<sup>1</sup>H NMR <sup>13</sup>C{<sup>1</sup>H} NMR, FTIR and HRMS)

**5'-Phenyl-[2,2'-bithiophene]-5-carbaldehyde (3aa):** Yellow Solid, 89%; **m.p.:** 153-154 °C; **<sup>1</sup>H NMR (500 MHz, CDCl<sub>3</sub>)** δ 9.87 (s, 1H), 7.68 (d, *J* = 4.0 Hz, 1H), 7.62 (d, *J* = 7.2 Hz, 2H), 7.42 (t, *J* = 7.6 Hz, 2H), 7.35 (d, *J* = 3.9 Hz, 2H), 7.29 – 7.27 (m, 2H); **<sup>13</sup>C{<sup>1</sup>H} NMR (125 MHz, CDCl<sub>3</sub>)** δ 182.4, 147.1, 146.2, 141.6, 137.3, 135.1, 133.5, 129.1, 128.3, 127.1, 125.8, 124.2, 124.0; **HRMS (ESI) *m/z*** cacl'd for C<sub>15</sub>H<sub>11</sub>OS<sub>2</sub> [M+H]<sup>+</sup> 271.0251, found 271.0246.

**5'-Phenyl-[2,2'-bithiophene]-5-carbonitrile (3ab):** Yellow Solid, 84%; **m.p.:** 126.7-127.7 °C; **<sup>1</sup>H NMR (500 MHz, CDCl<sub>3</sub>)** δ 7.62 (d, *J* = 7.5 Hz, 2H), 7.54 (d, *J* = 3.9 Hz, 1H), 7.43 (t, *J* = 7.6 Hz, 2H), 7.35 (t, *J* = 7.3 Hz, 1H), 7.27 (d, *J* = 4.3 Hz, 2H), 7.15 (d, *J* = 3.9 Hz, 1H); **<sup>13</sup>C{<sup>1</sup>H} NMR (125 MHz, CDCl<sub>3</sub>)** δ 146.0, 144.7, 138.3, 133.9, 133.3, 129.1, 128.4, 126.9, 125.8, 124.1, 123.2, 114.3, 107.2; **HRMS (ESI) *m/z*** cacl'd for C<sub>15</sub>H<sub>13</sub>N<sub>2</sub>S<sub>2</sub> [M+NH<sub>4</sub>]<sup>+</sup> 285.0520, found 285.0511.

**1-(5'-Phenyl-[2,2'-bithiophen]-5-yl)ethenone (3ac):** Yellow solid, 82%; **m.p.:** 115.2-118.9 °C; **<sup>1</sup>H NMR (500 MHz, CDCl<sub>3</sub>)** δ 7.61 (t, *J* = 6.3 Hz, 3H), 7.41 (t, *J* = 7.6 Hz, 2H), 7.31 (dd, *J* = 17.6, 5.6 Hz, 2H), 7.26 (d, *J* = 3.9 Hz, 1H), 7.19 (d, *J* = 3.9 Hz, 1H), 2.56 (s, 3H); **<sup>13</sup>C{<sup>1</sup>H} NMR (125 MHz, CDCl<sub>3</sub>)** δ 190.4, 145.8, 145.5, 142.3, 135.4, 133.6, 133.4, 129.1, 128.1, 126.6, 125.8, 124.1, 123.9, 26.5; **HRMS (ESI) *m/z*** cacl'd for C<sub>16</sub>H<sub>14</sub>NOS<sub>2</sub> [M+NH<sub>4</sub>]<sup>+</sup> 300.0517, found 300.0501.

**5-Bromo-5'-phenyl-2,2'-bithiophene (3ad):**<sup>s7</sup> Yellow solid, 83%; **m.p.:** 133-137 °C; **<sup>1</sup>H NMR (500 MHz, CDCl<sub>3</sub>)** δ 7.59 (d, *J* = 7.2 Hz, 2H), 7.39 (t, *J* = 7.7 Hz, 2H), 7.29 (t, *J* = 7.4 Hz, 1H), 7.21 (d, *J* = 3.8 Hz, 1H), 7.08 (d, *J* = 3.8 Hz, 1H), 6.98 (d, *J* = 3.8 Hz, 1H), 6.94 (d, *J* = 3.8 Hz, 1H); **<sup>13</sup>C{<sup>1</sup>H} NMR (125 MHz, CDCl<sub>3</sub>)** δ 143.7, 138.9, 135.5, 133.9, 130.7, 128.9, 127.8, 125.7, 124.9, 123.8, 123.7, 110.9.



**5-Phenyl-2,2'-bithiophene (3ae):**<sup>s8</sup> Yellow solid, 86%; **m.p.:** 120-124 °C; **<sup>1</sup>H NMR (500 MHz, CDCl<sub>3</sub>)** δ 7.64 (d, *J* = 5.7 Hz, 1H), 7.50 (d, *J* = 6.1 Hz, 1H), 7.44 – 7.36 (m, 3H), 7.28 (dd, *J* = 18.7, 10.4 Hz, 3H), 7.06 (s, 1H), 6.97 (d, *J* = 16.0 Hz, 1H); **<sup>13</sup>C{<sup>1</sup>H} NMR (125 MHz, CDCl<sub>3</sub>)** δ 143.1, 142.3, 137.0, 134.3, 128.9, 128.8, 128.3, 127.4, 126.3, 125.7, 123.6, 121.9.

**5-Methyl-5'-phenyl-2,2'-bithiophene (3af):**<sup>s9</sup> Yellow solid, 79%; **m.p.:** 94-99 °C; **<sup>1</sup>H NMR (500 MHz, CDCl<sub>3</sub>)** δ 7.60 (d, *J* = 7.2 Hz, 2H), 7.38 (t, *J* = 7.8 Hz, 2H), 7.29 (dd, *J* = 7.3, 6.2 Hz, 1H), 7.21 (d, *J* = 3.7 Hz, 1H), 7.07 (d, *J* = 3.7 Hz, 1H), 7.00 (d, *J* = 3.5 Hz, 1H), 6.73 – 6.65 (m, 1H), 2.50 (s, 3H); **<sup>13</sup>C{<sup>1</sup>H} NMR (125 MHz, CDCl<sub>3</sub>)** δ 142.5, 139.3, 137.2, 135.1, 134.2, 128.9, 127.4, 126.0, 125.6, 123.9, 123.6, 123.5, 15.4.

**5-(5-Phenylthiophen-2-yl)furan-2-carbaldehyde (3ag):**<sup>s10</sup> Red solid, 78%; **m.p.:** 114-117 °C; **<sup>1</sup>H NMR (500 MHz, CDCl<sub>3</sub>)** δ 9.62 (s, 1H), 7.63 (d, *J* = 7.5 Hz, 2H), 7.50 (d, *J* = 3.8 Hz, 1H), 7.42 (t, *J* = 7.6 Hz, 2H), 7.39–7.28 (m, 3H), 6.69 (d, *J* = 3.7 Hz, 1H); **<sup>13</sup>C{<sup>1</sup>H} NMR (125 MHz, CDCl<sub>3</sub>)** δ .8, 154.8, 151.5, 146.7, 133.5, 130.5, 129.1, 128.3, 127.2, 125.9, 124.1, 107.5.

**2-(5-Phenylthiophen-2-yl)pyridine (3ah):**<sup>s11</sup> Yellow solid, 72%; **m.p.:** 100-102 °C; **<sup>1</sup>H NMR (500 MHz, CDCl<sub>3</sub>)** δ 8.59 (d, *J* = 3.6 Hz, 1H), 7.69 (d, *J* = 4.0 Hz, 3H), 7.62 (d, *J* = 7.5 Hz, 1H), 7.57 (d, *J* = 3.1 Hz, 1H), 7.41 (t, *J* = 6.3 Hz, 2H), 7.37–7.28 (m, 2H), 7.18 (dd, *J* = 9.0, 4.4 Hz, 1H); **<sup>13</sup>C{<sup>1</sup>H} NMR (125 MHz, CDCl<sub>3</sub>)** δ 152.5, 149.6, 136.6, 128.9, 127.8, 127.6, 125.8, 125.6, 125.4, 124.5, 124.0, 121.9, 118.6.

**4-(5-Phenylthiophen-2-yl)benzaldehyde (3ai):**<sup>s12</sup> White solid, 83%; **m.p.:** 167-169 °C; **<sup>1</sup>H NMR (500 MHz, CDCl<sub>3</sub>)** δ 10.00 (s, 1H), 7.90 (d, *J* = 7.9 Hz, 2H), 7.78 (d, *J* = 7.9 Hz, 2H), 7.65 (d, *J* = 7.3 Hz, 2H), 7.50–7.39 (m, 3H), 7.34 (d, *J* = 3.9 Hz, 2H); **<sup>13</sup>C{<sup>1</sup>H} NMR (125 MHz, CDCl<sub>3</sub>)** δ 191.4, 145.9, 141.7, 140.0, 135.0, 133.8, 130.5, 129.1, 128.1, 126.08, 125.8, 125.7, 124.4.

**2-(4-(Tert-butyl)phenyl)-5-phenylthiophene (3aj):**<sup>s13</sup> White solid; 84%; **m.p.:** 135-137 °C; **<sup>1</sup>H NMR (500 MHz, CDCl<sub>3</sub>)** δ 7.67 (d, *J* = 7.6 Hz, 2H), 7.61 (d, *J* = 8.4 Hz, 2H), 7.49–7.40

(m, 4H), 7.34–7.27 (m, 3H), 1.39 (s, 9H);  $^{13}\text{C}\{^1\text{H}\}$  NMR (125 MHz,  $\text{CDCl}_3$ )  $\delta$  150.7, 143.8, 143.1, 134.5, 131.6, 128.9, 127.4, 125.9, 125.6, 125.4, 123.9, 123.6, 34.7, 31.3.

**2,5-Diphenylthiophene (3ak):**<sup>s14</sup> White solid, 86 %; **m.p.:** 147-150 °C;  $^1\text{H}$  NMR (500 MHz,  $\text{CDCl}_3$ )  $\delta$  7.67 (d,  $J = 7.5$  Hz, 4H), 7.42 (t,  $J = 7.5$  Hz, 4H), 7.33-7.32 (m 1H);  $^{13}\text{C}\{^1\text{H}\}$  NMR (125 MHz,  $\text{CDCl}_3$ )  $\delta$  143.7, 134.4, 128.9, 127.5, 125.6, 124.0.

**4-([2,2'-Bithiophen]-5-yl)benzaldehyde (3bf):**<sup>s12</sup> Yellow solid, 82%; **m.p.:** 169-171°C;  $^1\text{H}$  NMR (500 MHz,  $\text{CDCl}_3$ )  $\delta$  10.02 (s, 1H), 7.91 (d,  $J = 8.1$  Hz, 2H), 7.76 (d,  $J = 8.0$  Hz, 2H), 7.40 (d,  $J = 3.7$  Hz, 1H), 7.30 – 7.29 (m, 1H), 7.27 (d,  $J = 3.5$  Hz, 1H), 7.21 (d,  $J = 3.7$  Hz, 1H), 7.09 – 7.05 (m, 1H).  $^{13}\text{C}\{^1\text{H}\}$  NMR (125 MHz,  $\text{CDCl}_3$ )  $\delta$  191.4, 141.1, 139.7, 138.9, 136.9, 135.1, 130.5, 128.0, 125.8, 125.6, 125.1, 124.9, 124.3.

**4-([2,2'-Bithiophen]-5-yl)benzotrile (3cf):**<sup>s8</sup> Yellow solid, 80%; **m.p.:** 140-142 °C;  $^1\text{H}$  NMR (500 MHz,  $\text{CDCl}_3$ )  $\delta$  6.95 (d,  $J = 3.4$  Hz, 2H), 6.90 (d,  $J = 4.8$  Hz, 2H), 6.86 (d,  $J = 2.5$  Hz, 1H), 6.80 (d,  $J = 3.4$  Hz, 2H), 6.70–6.66 (m, 2H);  $^{13}\text{C}\{^1\text{H}\}$  NMR (125 MHz,  $\text{CDCl}_3$ )  $\delta$  140.4, 139.1, 138.3, 136.7, 132.8, 128.1, 125.9, 125.7, 125.2, 124.9, 124.4, 118.9, 110.5.

**5-(4-Bromophenyl)-2,2'-bithiophene (3df):**<sup>s15</sup> Yellow solid, 76%; **m.p.:** 279 °C;  $^1\text{H}$  NMR (500 MHz,  $\text{CDCl}_3$ )  $\delta$  7.67 (dd,  $J = 25.9, 6.5$  Hz, 2H), 7.47 (d,  $J = 6.6$  Hz, 1H), 7.39 (d,  $J = 6.9$  Hz, 1H), 7.25 (dd,  $J = 32.2, 14.3$  Hz, 3H), 7.08 (d,  $J = 21.5$  Hz, 2H);  $^{13}\text{C}\{^1\text{H}\}$  NMR (125 MHz,  $\text{CDCl}_3$ )  $\delta$  128.9, 127.9, 127.6, 127.5, 126.9, 125.9, 124.7, 124.6, 124.4, 124.3, 123.8, 123.7.

**5-(4-(Tert-butyl)phenyl)-2,2'-bithiophene (3ef):**<sup>s16</sup> Yellow solid, 76%; **m.p.:** 97 °C;  $^1\text{H}$  NMR (500 MHz,  $\text{CDCl}_3$ )  $\delta$  7.56 (d,  $J = 8.3$  Hz, 2H), 7.43 (d,  $J = 8.3$  Hz, 2H), 7.22 (dd,  $J = 9.2, 4.3$  Hz, 3H), 7.15 (d,  $J = 3.6$  Hz, 1H), 7.07 – 7.00 (m, 1H), 1.37 (s, 9H);  $^{13}\text{C}\{^1\text{H}\}$  NMR (125 MHz,  $\text{CDCl}_3$ )  $\delta$  150.8, 143.3, 137.6, 136.2, 131.3, 127.9, 125.9, 125.4, 124.6, 124.2, 123.5, 123.3, 34.7, 31.3.

**5-(4-Methoxyphenyl)-2,2'-bithiophene (3ff):**<sup>s17</sup> Yellow solid, 78%; **m.p.:** 151-156 °C;  $^1\text{H}$  NMR (500 MHz,  $\text{CDCl}_3$ )  $\delta$  7.57 (d,  $J = 8.7$  Hz, 2H), 7.46 (t,  $J = 7.7$  Hz, 1H), 7.35 (t,  $J = 7.3$  Hz, 1H), 7.26–7.19 (m, 1H), 7.15 (dd,  $J = 8.3, 3.7$  Hz, 1H), 7.06 (dd,  $J = 4.9, 3.7$  Hz, 1H), 7.01 (dd,  $J = 11.5, 8.7$  Hz, 1H), 6.96 (d,  $J = 8.7$  Hz, 1H), 3.87 (s, 3H);  $^{13}\text{C}\{^1\text{H}\}$  NMR (125 MHz,

$\text{CDCl}_3$ )  $\delta$  159.3, 143.1, 137.6, 136.6, 135.7, 127.8, 126.9, 124.6, 124.1, 123.40, 122.7, 114.4, 55.4.

**5-(Naphthalen-1-yl)-2,2'-bithiophene (3gf):**<sup>s8</sup> Yellow solid, 73%; **m.p.:** 94-98 °C;  **$^1\text{H}$  NMR (500 MHz,  $\text{CDCl}_3$ )**  $\delta$  8.38 (dd,  $J = 6.0, 3.4$  Hz, 1H), 8.01 (dd,  $J = 8.0, 4.1$  Hz, 1H), 7.96 (dd,  $J = 5.9, 3.4$  Hz, 1H), 7.92 (d,  $J = 8.2$  Hz, 1H), 7.66 (d,  $J = 6.9$  Hz, 1H), 7.61–7.53 (m, 3H), 7.31 (dd,  $J = 10.8, 4.0$  Hz, 2H), 7.22 (d,  $J = 3.6$  Hz, 1H), 7.16–7.07 (m, 1H);  **$^{13}\text{C}$  NMR (126 MHz,  $\text{CDCl}_3$ )**  $\delta$  140.9, 137.7, 137.4, 134.0, 132.1, 128.6, 128.5, 128.2, 128.1, 127.9, 126.6, 126.2, 125.7, 125.4, 124.5, 124.1, 123.8.

**[2,2':5',2''-Terthiophene]-5-carbaldehyde (3ha):**<sup>s18</sup> Yellow solid, 79%; **m.p.:** 138-142 °C;  **$^1\text{H}$  NMR (500 MHz,  $\text{CDCl}_3$ )**  $\delta$  9.86 (s, 1H), 7.68 (d,  $J = 3.8$  Hz, 1H), 7.31–7.27 (m, 2H), 7.24 (d,  $J = 3.3$  Hz, 2H), 7.13 (d,  $J = 3.6$  Hz, 1H), 7.08 – 7.04 (m, 1H);  **$^{13}\text{C}\{^1\text{H}\}$  NMR (125 MHz,  $\text{CDCl}_3$ )**  $\delta$  182.5, 146.9, 141.6, 139.2, 137.4, 136.4, 134.5, 128.1, 126.9, 125.4, 124.7, 124.5, 124.1.

**5-Bromo-2,2':5',2''-terthiophene (3hd):**<sup>s19</sup> Yellow solid, (79%); **m.p.:** 135-140 °C;  **$^1\text{H}$  NMR (500 MHz,  $\text{CDCl}_3$ )**  $\delta$  7.24 (t,  $J = 4.6$  Hz, 1H), 7.18 (d,  $J = 2.8$  Hz, 1H), 7.07 (d,  $J = 3.7$  Hz, 1H), 7.05 – 7.02 (m, 1H), 7.01 (d,  $J = 3.7$  Hz, 1H), 6.99 – 6.97 (m, 1H), 6.91 (d,  $J = 3.5$  Hz, 1H);  **$^{13}\text{C}\{^1\text{H}\}$  NMR (125 MHz,  $\text{CDCl}_3$ )**  $\delta$  138.6, 136.9, 136.7, 135.1, 130.7, 127.9, 124.7, 124.6, 124.3, 123.9, 123.7, 111.1.

**5-(Methoxymethyl)-2,2':5',2''-terthiophene (3hl):**<sup>s20</sup> Yellow solid, 74%; **m.p.:** 179 °C;  **$^1\text{H}$  NMR (500 MHz,  $\text{CDCl}_3$ )**  $\delta$  7.24 – 7.22 (m, 1H), 7.18 (d,  $J = 3.5$  Hz, 1H), 7.07 (dd,  $J = 9.8, 3.7$  Hz, 2H), 7.04 (dd,  $J = 6.0, 2.4$  Hz, 2H), 6.91 (d,  $J = 3.5$  Hz, 1H), 4.60 (s, 2H), 3.42 (s, 3H).  **$^{13}\text{C}\{^1\text{H}\}$  NMR (125 MHz,  $\text{CDCl}_3$ )**  $\delta$  140.1, 137.6, 137.1, 136.3, 136.2, 127.9, 127.2, 124.5, 124.3, 124.3, 123.7, 123.2, 69.1, 57.8.

**2,2':5',2''-Terthiophene (3hf):**<sup>s21</sup> Yellow solid, 82%; **m.p.:** 92-95 °C;  **$^1\text{H}$  NMR (500 MHz,  $\text{CDCl}_3$ )**  $\delta$  7.23 (dd,  $J = 5.5, 1$  Hz, 2H), 7.19-7.18(m, 4H), 7.09 (s, 2H), 7.04-7.02 (m, 4H);  **$^{13}\text{C}\{^1\text{H}\}$  NMR (125 MHz,  $\text{CDCl}_3$ )**  $\delta$  137.2, 136.3, 127.9, 124.5, 124.3, 123.7.

**5-(Benzo[*b*]thiophen-2-yl)thiophene-2-carbaldehyde (3ia):**<sup>s22</sup> Yellow solid, 72%; **m.p.:** 182-185 °C; **<sup>1</sup>H NMR (500 MHz, CDCl<sub>3</sub>)** δ 9.89 (s, 1H), 7.82–7.77 (m, 1H), 7.70 (d, *J* = 4.0 Hz, 1H), 7.59 (s, 1H), 7.40–7.35 (m, 3H); **<sup>13</sup>C{<sup>1</sup>H} NMR (125 MHz, CDCl<sub>3</sub>)** δ 182.5, 146.9, 144.6, 139.9, 139.8, 137.1, 135.6, 125.6, 125.5, 125.1, 124.1, 122.5, 122.3.

**5-(Benzo[*b*]thiophen-2-yl)thiophene-2-carbonitrile (3ib):**<sup>s22</sup> Yellow solid, 70%; **m.p.:** 176-179 °C; **<sup>1</sup>H NMR (500 MHz, CDCl<sub>3</sub>)** δ 7.82–7.77 (m, 2H), 7.56 (d, *J* = 4.0 Hz, 1H), 7.52 (s, 1H), 7.41–7.36 (m, 2H), 7.24 (d, *J* = 4.0 Hz, 1H); **<sup>13</sup>C{<sup>1</sup>H} NMR (125 MHz, CDCl<sub>3</sub>)** δ 144.5, 139.8, 139.7, 138.2, 134.4, 125.7, 125.2, 124.4, 124.1, 122.4, 122.3, 114.0, 108.6.

**1-(5-(Benzo[*b*]thiophen-2-yl)thiophen-2-yl)ethenone (3ic):**<sup>s22</sup> Yellow solid, 65%; **m.p.:** 174-179 °C; **<sup>1</sup>H NMR (500 MHz, CDCl<sub>3</sub>)** δ 7.81–7.76 (m, 2H), 7.61 (d, *J* = 4.0 Hz, 1H), 7.54 (s, 1H), 7.39–7.32 (m, 2H), 7.27 (d, *J* = 4.0 Hz, 1H), 2.57 (s, 3H); **<sup>13</sup>C{<sup>1</sup>H} NMR (125 MHz, CDCl<sub>3</sub>)** δ 190.3, 145.5, 140.0, 139.7, 135.9, 133.1, 125.4, 125.3, 124.9, 124.0, 122.2, 121.9, 26.6.

**5-(Benzo[*b*]thiophen-2-yl)furan-2-carbaldehyde (3ig):**<sup>s22</sup> Yellow solid, 68%; **m.p.:** 168-172 °C; **<sup>1</sup>H NMR (500 MHz, CDCl<sub>3</sub>)** δ 9.67 (s, 1H), 7.87-7.82 (m, 2H), 7.8 (s, 1H), 7.42–7.39 (m, 2H), 7.34 (d, *J* = 4.5 Hz, 1H), 6.82 (d, *J* = 4.5 Hz, 1H); **<sup>13</sup>C{<sup>1</sup>H} NMR (125 MHz, CDCl<sub>3</sub>)** δ 177.1, 154.5, 152.1, 139.9, 139.7, 131.0, 125.7, 125.1, 124.4, 123.1, 122.7, 122.4, 109.2.

**5,5'-Diphenyl-2,2'-bithiophene (1a')**<sup>s23</sup> Yellow solid, 25%; **m.p.:** 234-240 °C; **<sup>1</sup>H NMR (500 MHz, CDCl<sub>3</sub>)** δ 7.64 (dd, *J* = 8.2, 0.9 Hz, 4H), 7.40 (t, *J* = 7.6 Hz, 4H), 7.34 – 7.28 (m, 5H), 7.10 (dd, *J* = 5.0, 3.6 Hz, 1H); **<sup>13</sup>C{<sup>1</sup>H} NMR (125 MHz, CDCl<sub>3</sub>)** δ 128.9, 128.9, 128.0, 127.48, 126.0, 125.7, 124.8, 123.1.

**[2,2'-Bithiophene]-5,5'-dicarbaldehyde (2a')**<sup>s24</sup> Yellow solid, 17%; **m.p.:** 216-221 °C; **<sup>1</sup>H NMR (500 MHz, CDCl<sub>3</sub>)** δ 9.92 (s, 2H), 7.73 (d, *J* = 5.0 Hz, 2H), 7.43 (d, *J* = 5.0 Hz, 2H); **<sup>13</sup>C{<sup>1</sup>H} NMR (125 MHz, CDCl<sub>3</sub>)** δ 182.6, 144.9, 143.9, 137.0, 126.5.

## Spectral Images ( $^1\text{H}$ NMR $^{13}\text{C}\{^1\text{H}\}$ NMR, FTIR and HRMS)

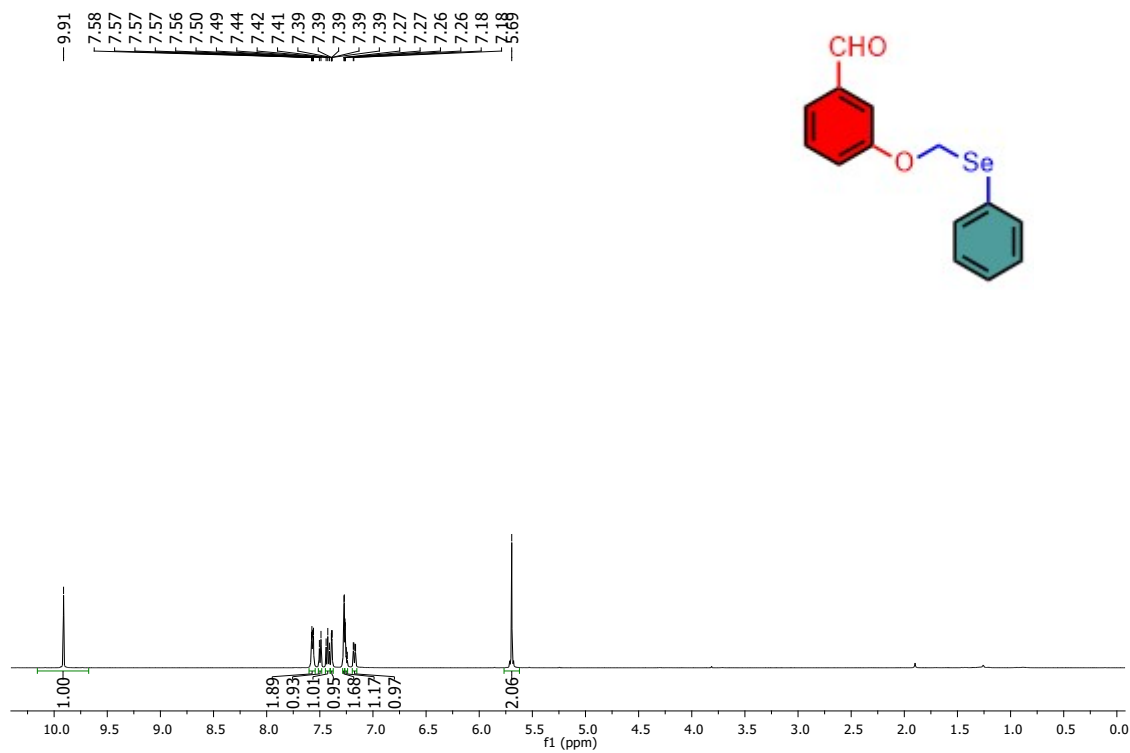

Figure s5:  $^1\text{H}$  NMR spectrum of P.

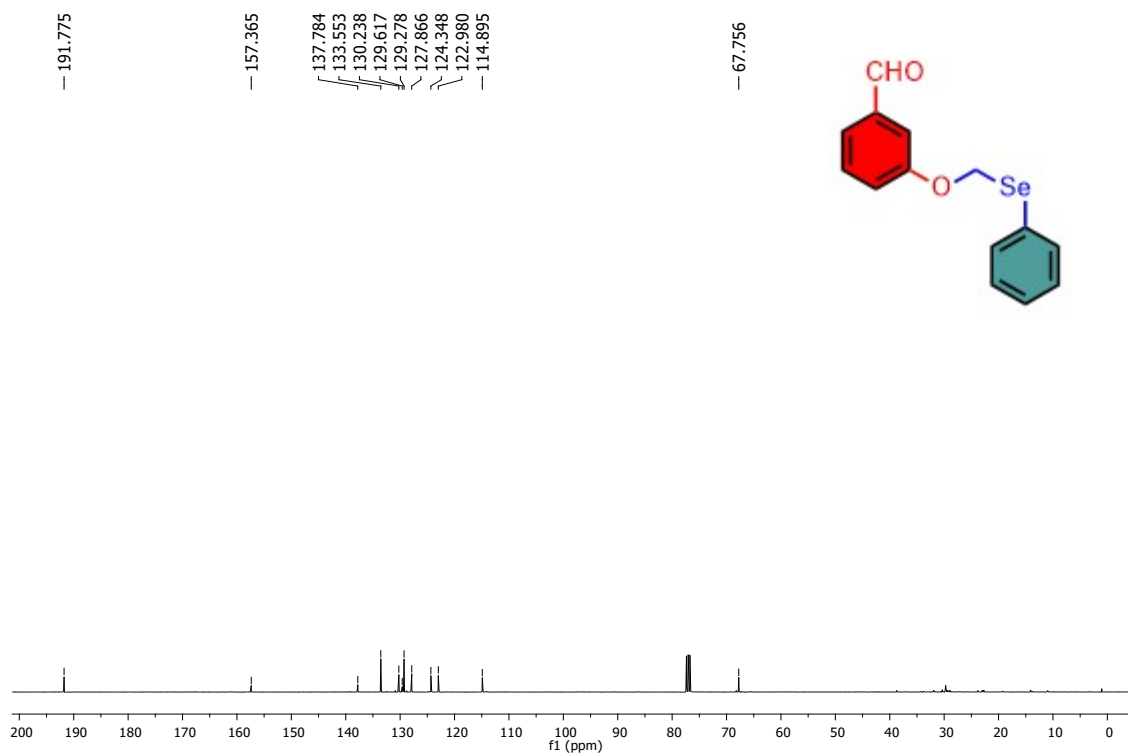

**Figure s6:**  $^{13}\text{C}\{^1\text{H}\}$  NMR spectrum of **P**.

**Compound Details**

**Cpd. 1: C<sub>14</sub>H<sub>12</sub>O<sub>2</sub>Se**

Compound Spectra (overlaid)

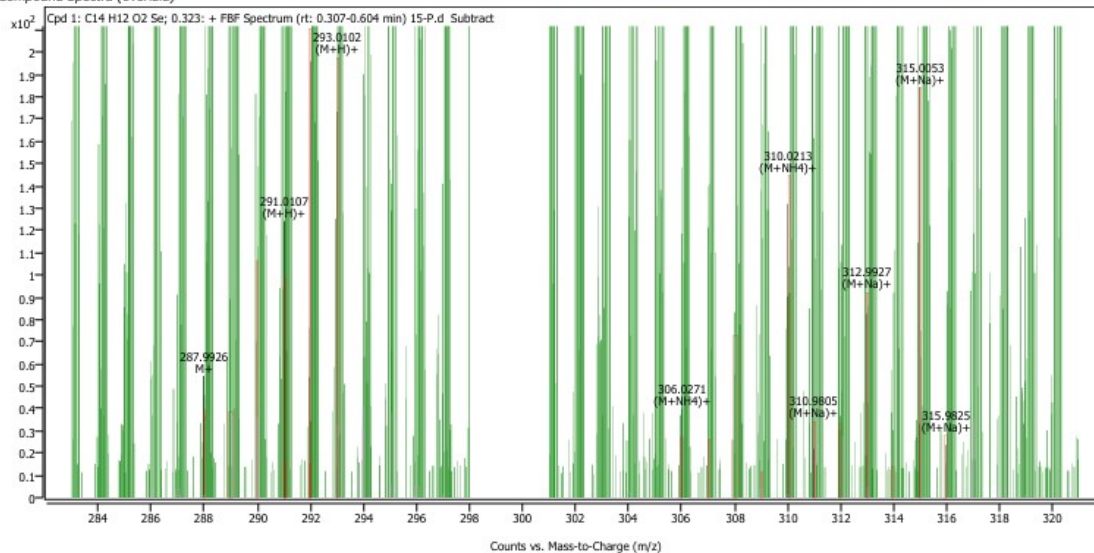

**Figure s7:** HRMS spectrum of **P**.

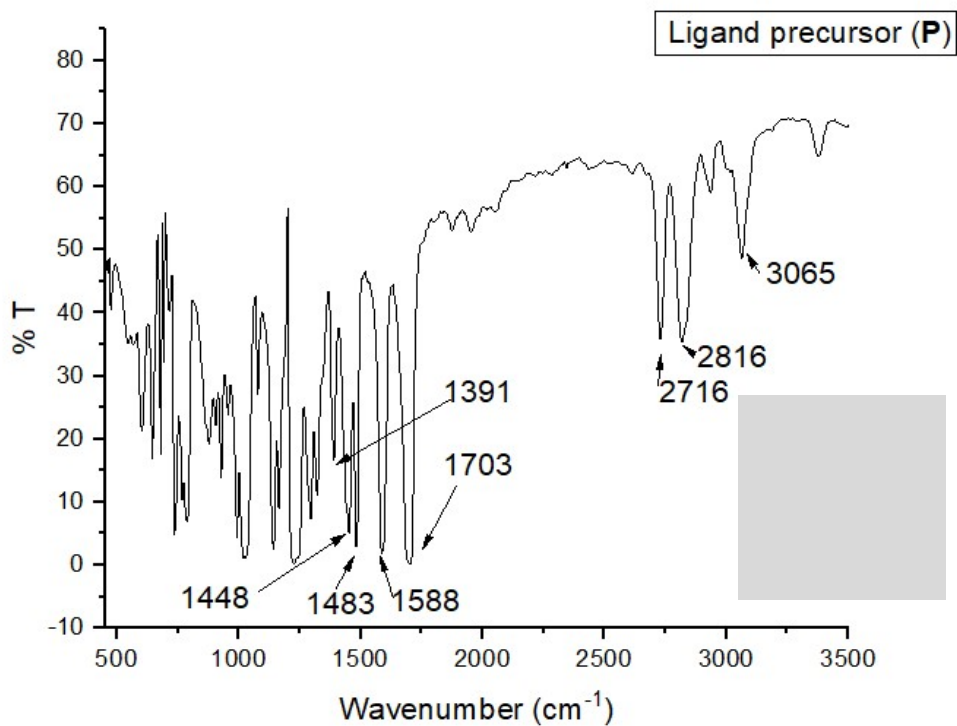

**Figure s8:** FTIR spectrum of **P**.

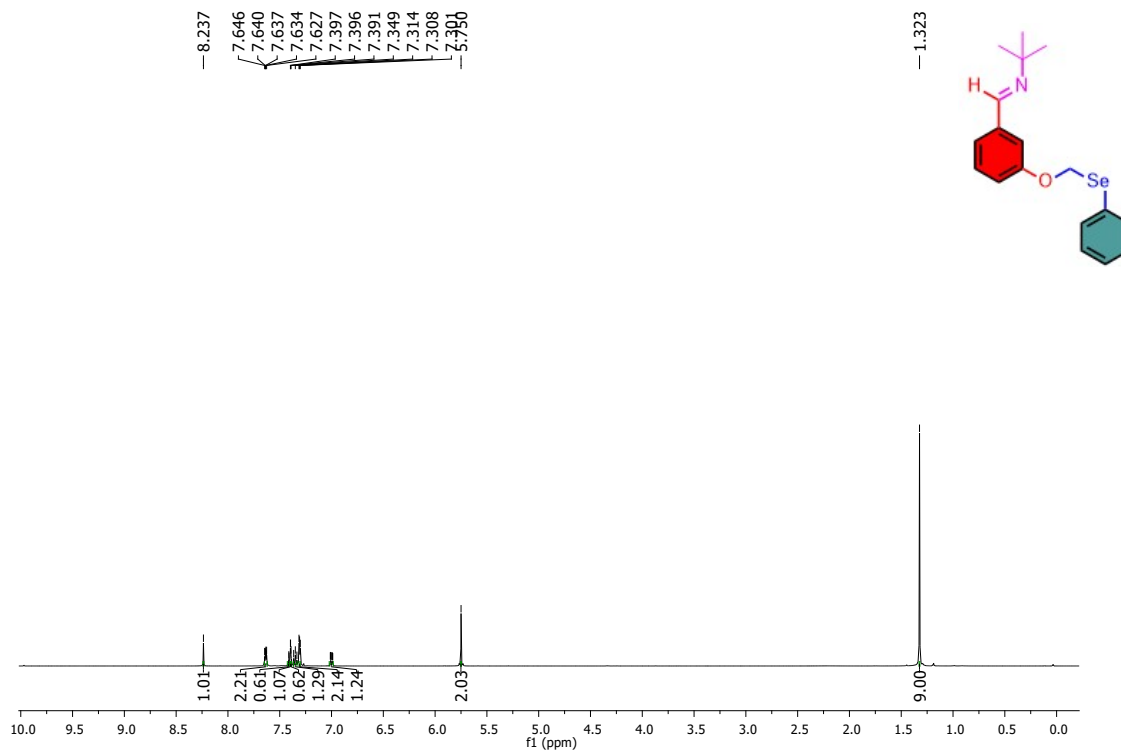

Figure s9:  $^1\text{H}$  NMR spectrum of L1.

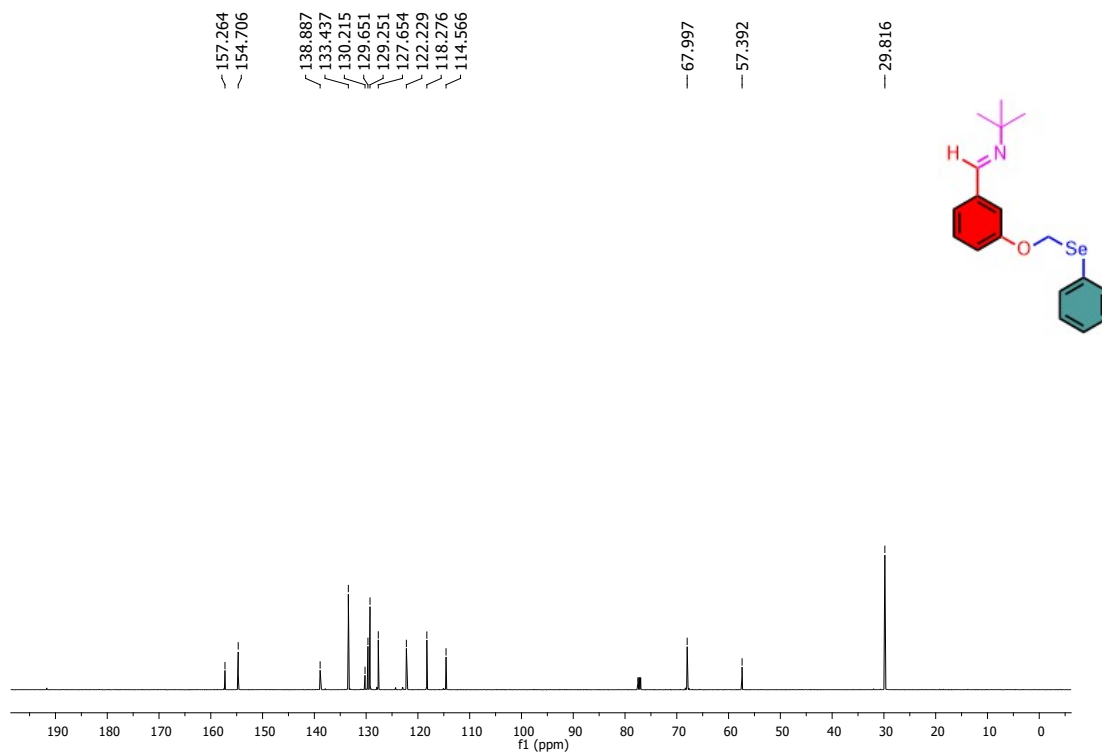

Figure s10:  $^{13}\text{C}\{^1\text{H}\}$  NMR spectrum of ligand L1.

**Compound Details**

**Cpd. 1: C<sub>18</sub>H<sub>21</sub>N O Se**

Compound Spectra (overlaid)

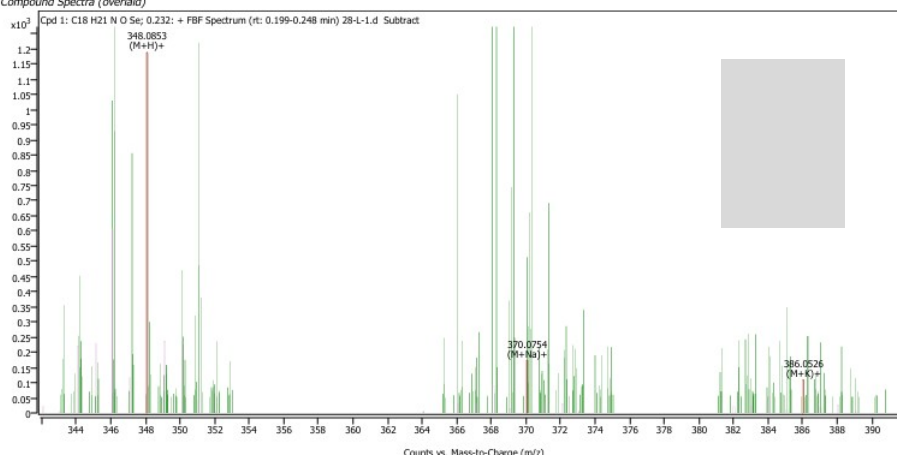

**Figure s11: HRMS spectrum of L1.**

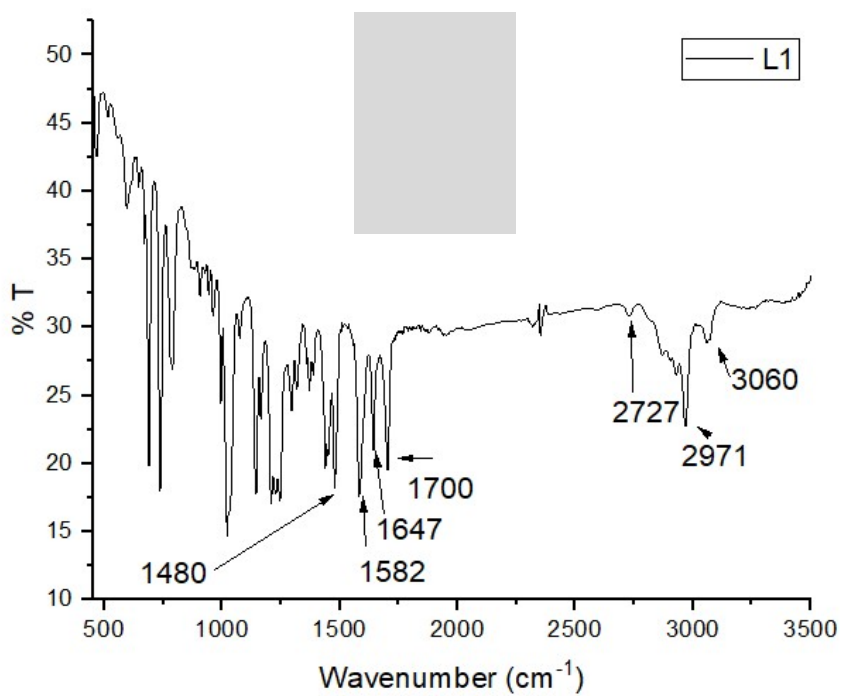

**Figure s12: FTIR spectrum of L1.**



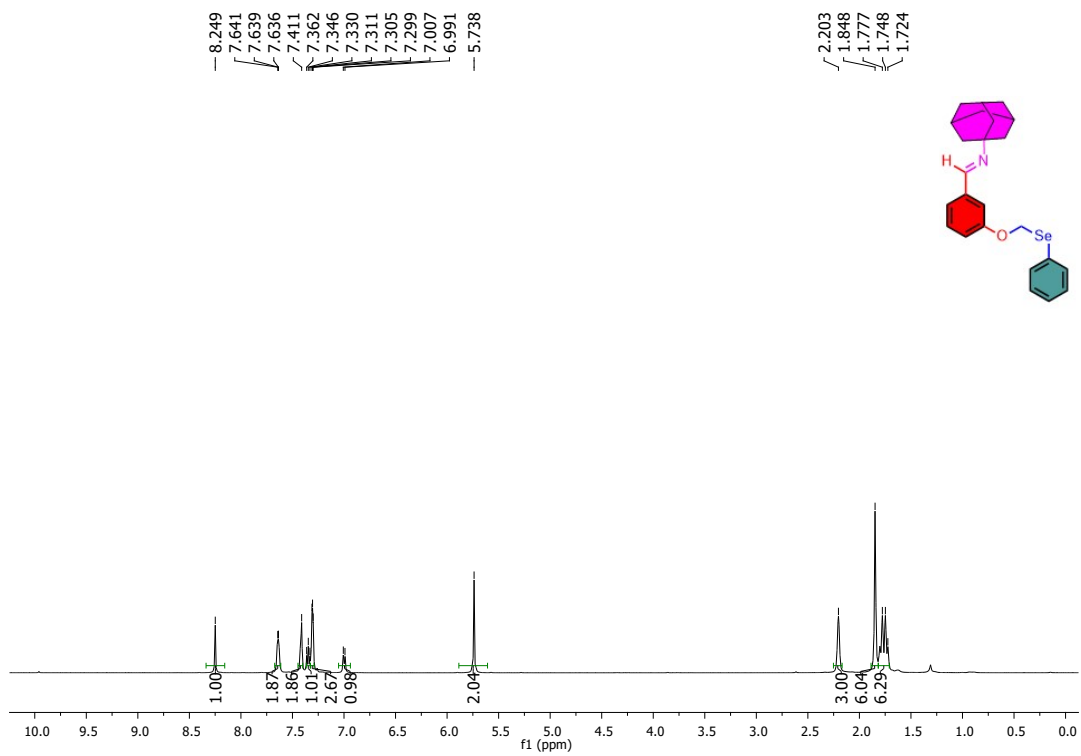

**Figure s13:**  $^1\text{H}$  NMR spectrum of L2.

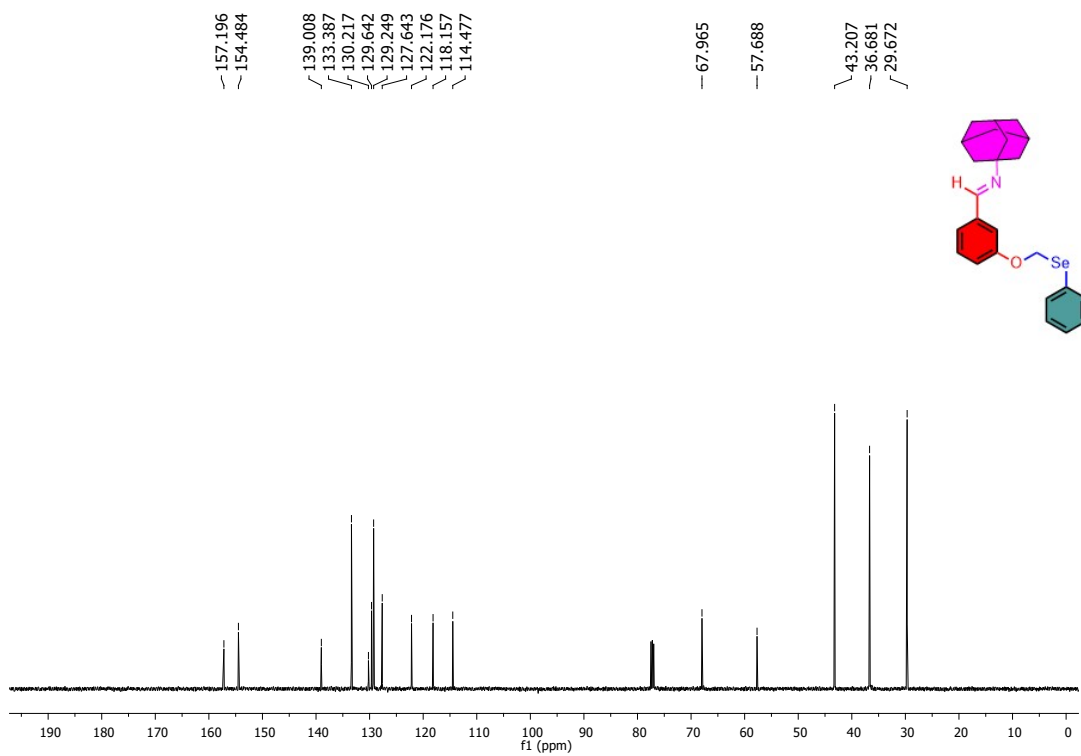

**Figure s14:**  $^{13}\text{C}\{^1\text{H}\}$  NMR spectrum of L2.

**Compound Details**

**Cpd. 1: C<sub>24</sub>H<sub>27</sub>N O Se**

Compound Spectra (overlaid)

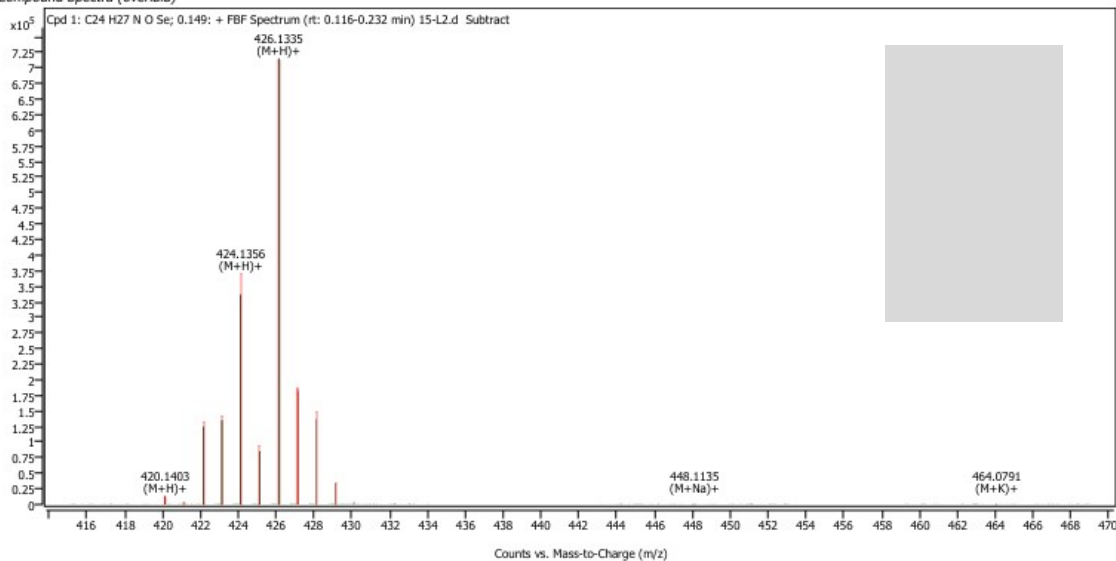

**Figure s15: HRMS spectrum of L2.**

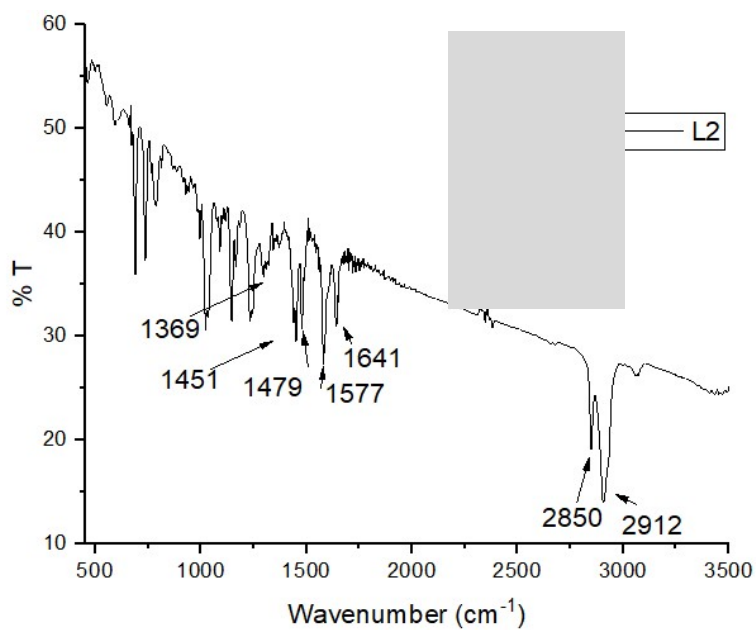

**Figure s16: FTIR spectrum of L2.**

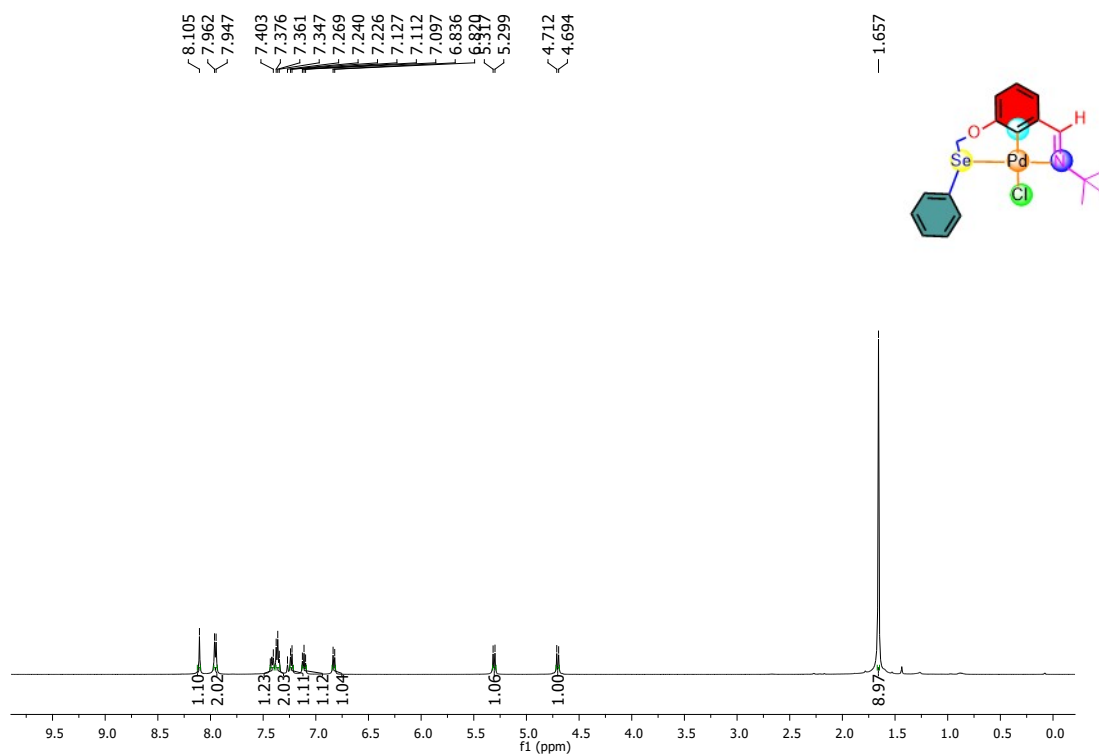

**Figure s17:**  $^1\text{H}$  NMR spectrum of C1.

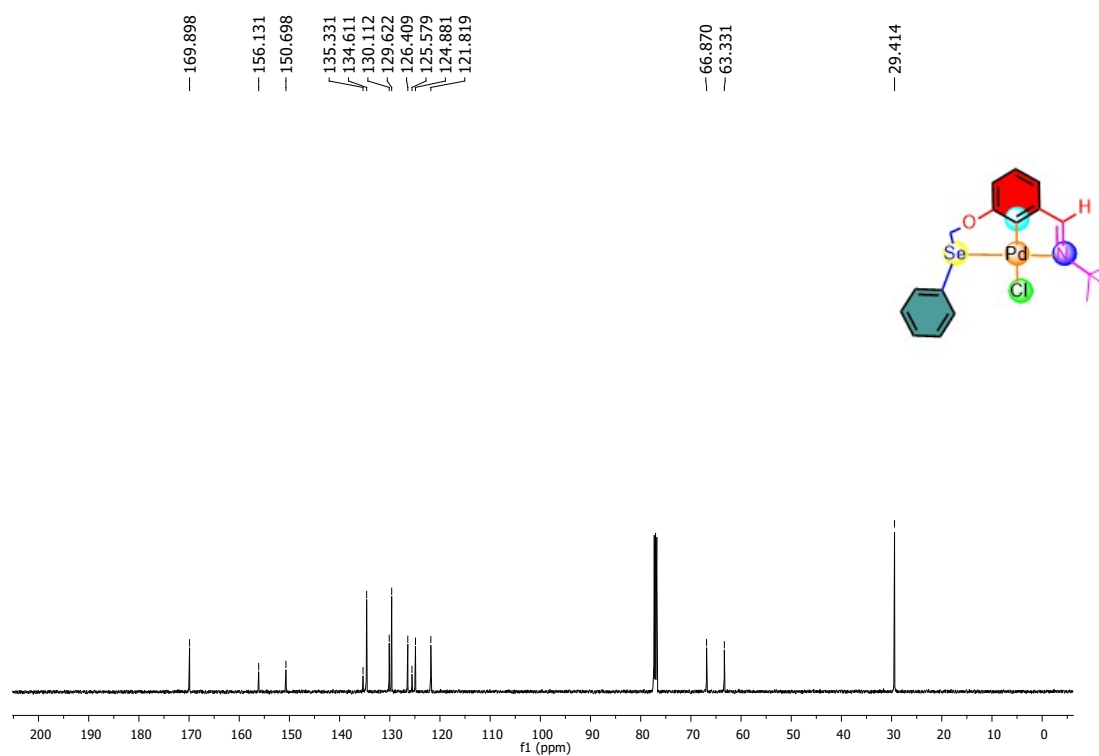

**Figure s18:**  $^{13}\text{C}\{^1\text{H}\}$  NMR spectrum of C1.

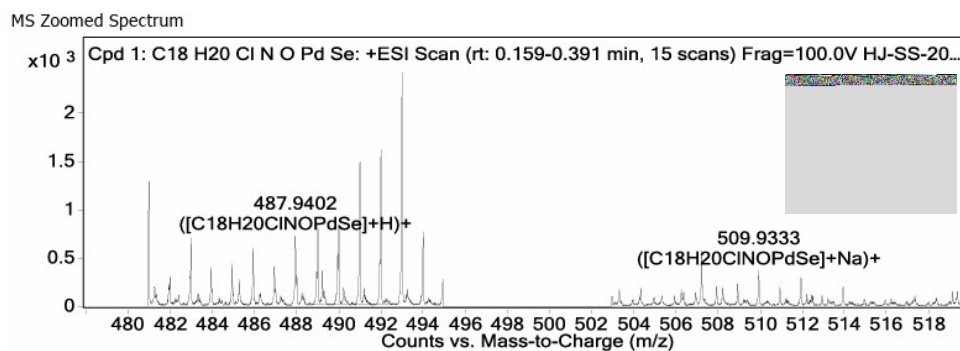

**Figure s19:** HRMS spectrum of C1.

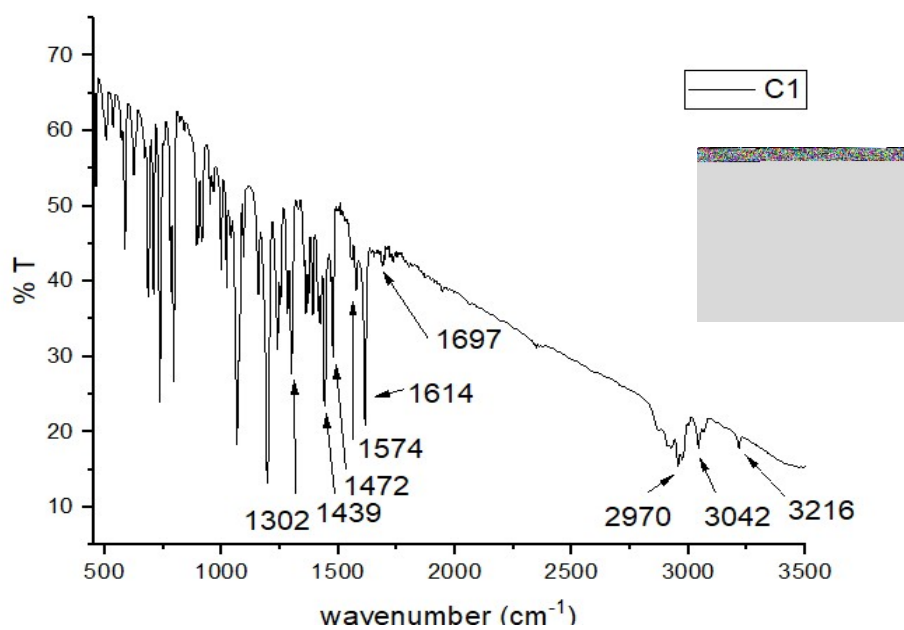

**Figure s20:** FTIR spectrum of C1.

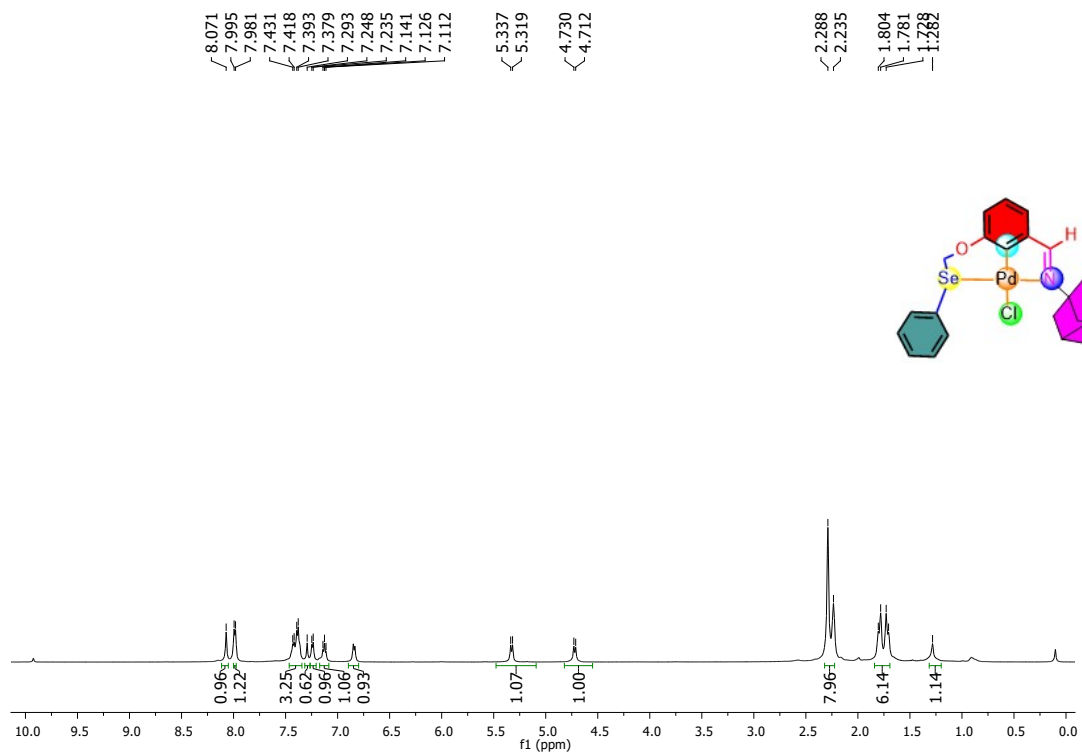

Figure s21:  $^1\text{H}$  NMR spectrum of C2.

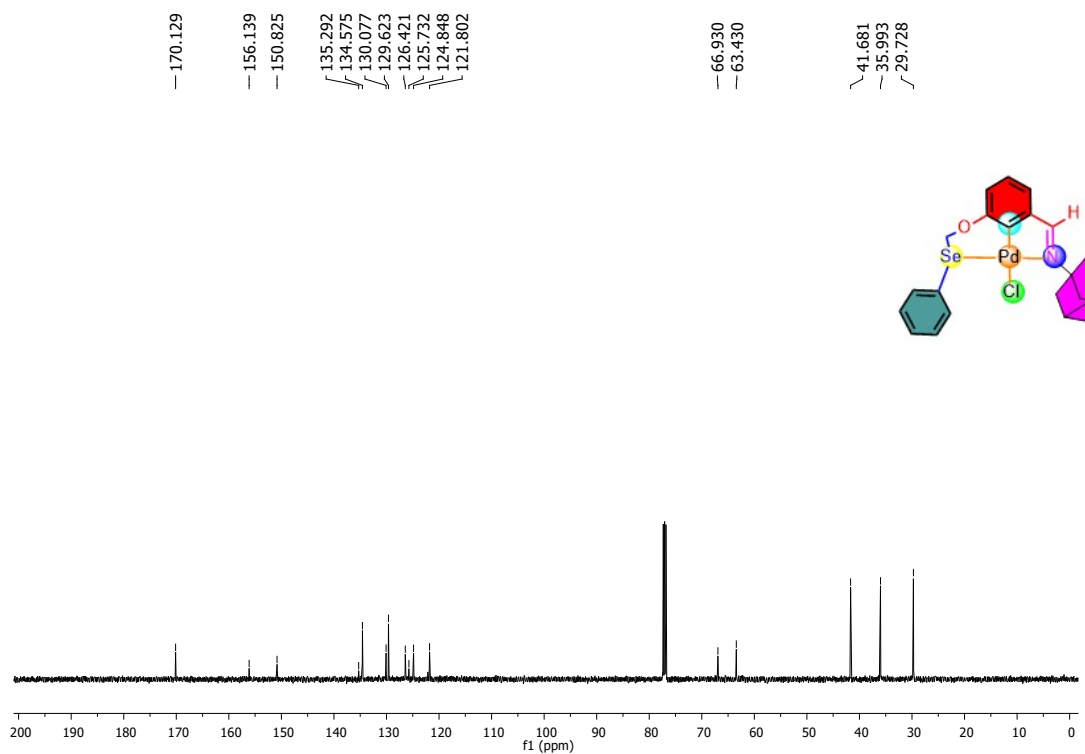

Figure s22:  $^{13}\text{C}\{^1\text{H}\}$  NMR spectrum of C2.

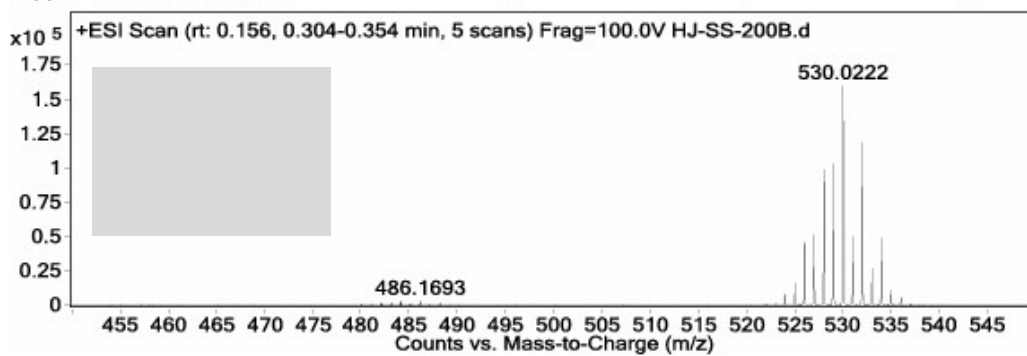

Figure s23: HRMS spectrum of C2.

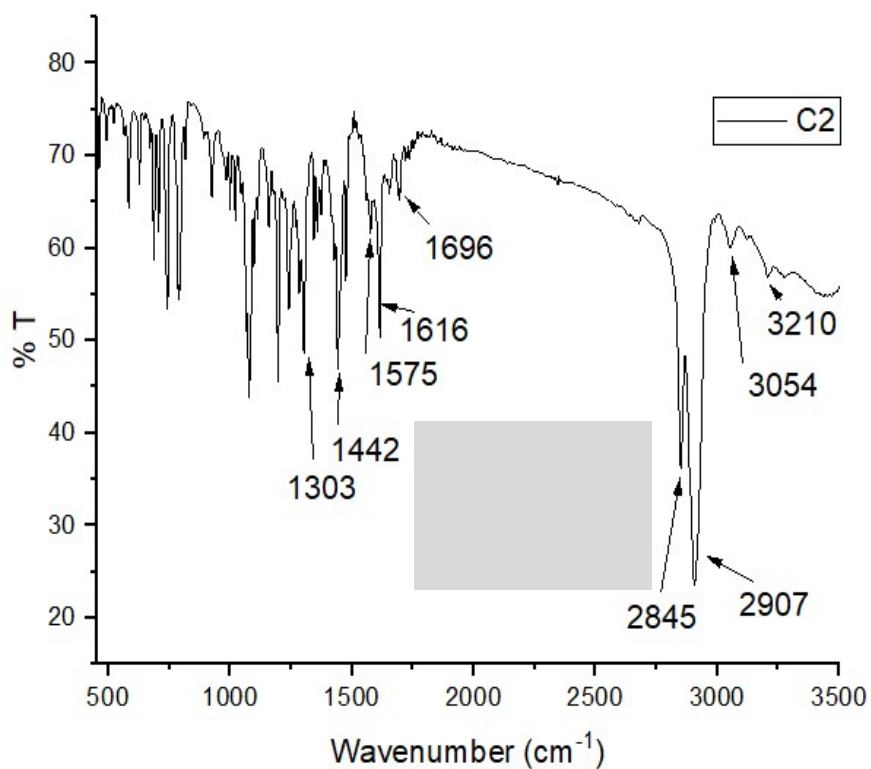

Figure s24: FTIR spectrum of C2.

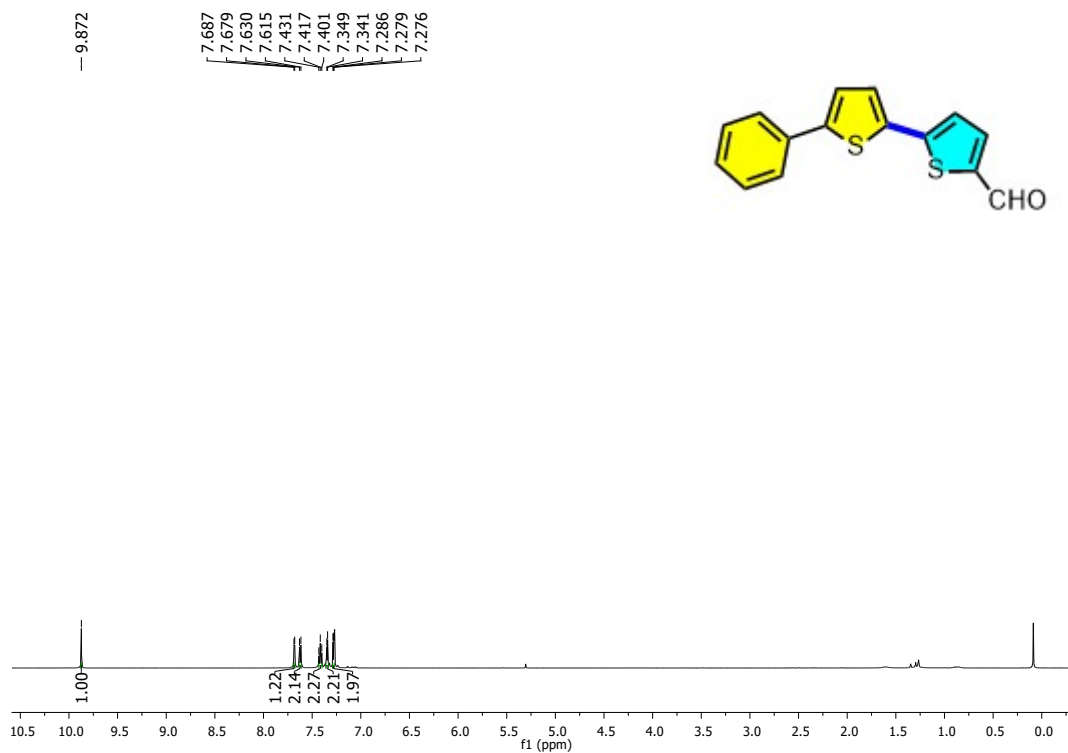

Figure s25:  $^1\text{H}$  NMR spectrum of compound 3aa.

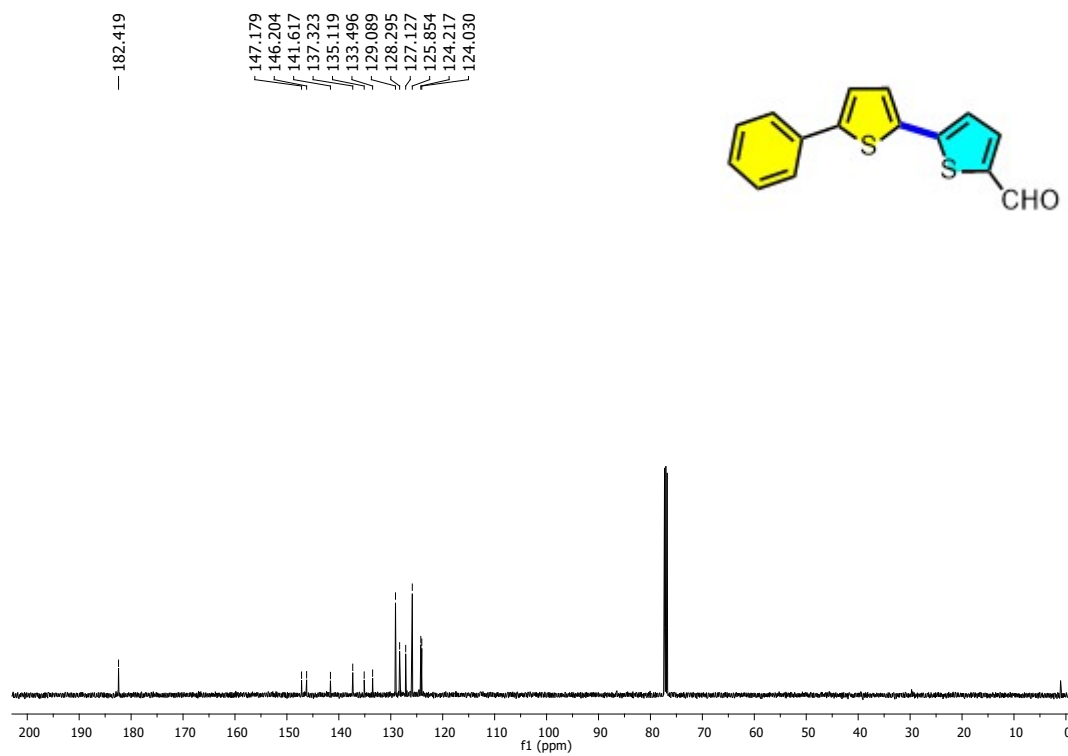

Figure s26:  $^{13}\text{C}$   $\{^1\text{H}\}$  NMR spectrum of compound 3aa.

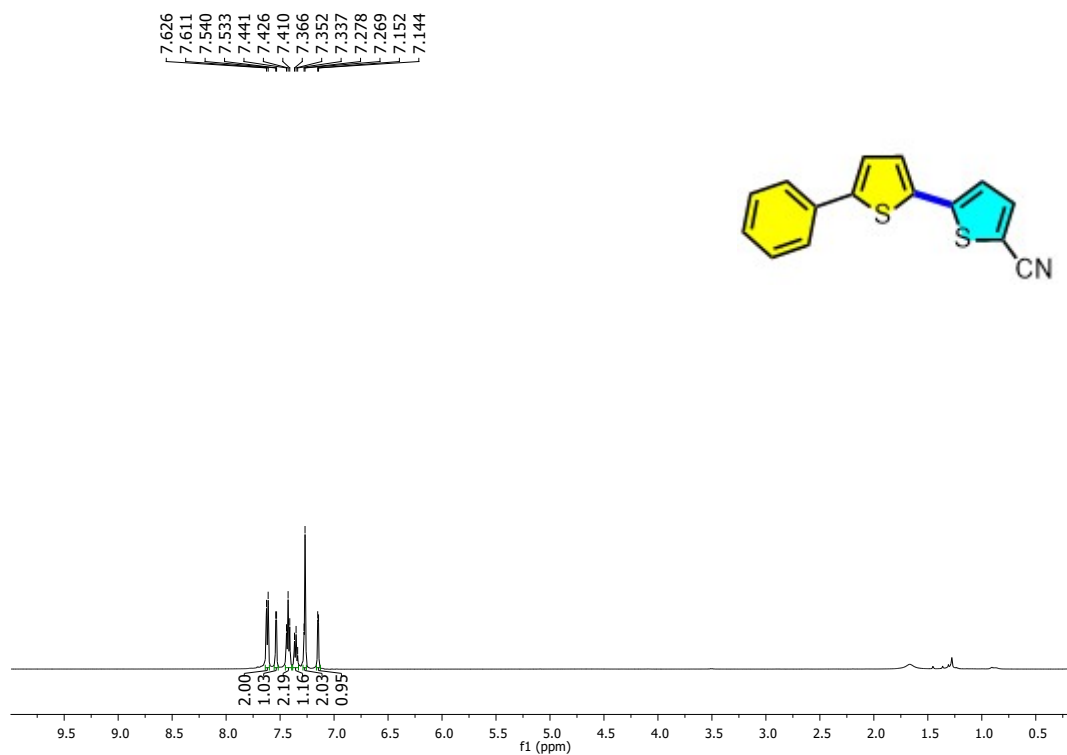

**Figure s27:**  $^1\text{H}$  NMR spectrum of compound **3ab**.

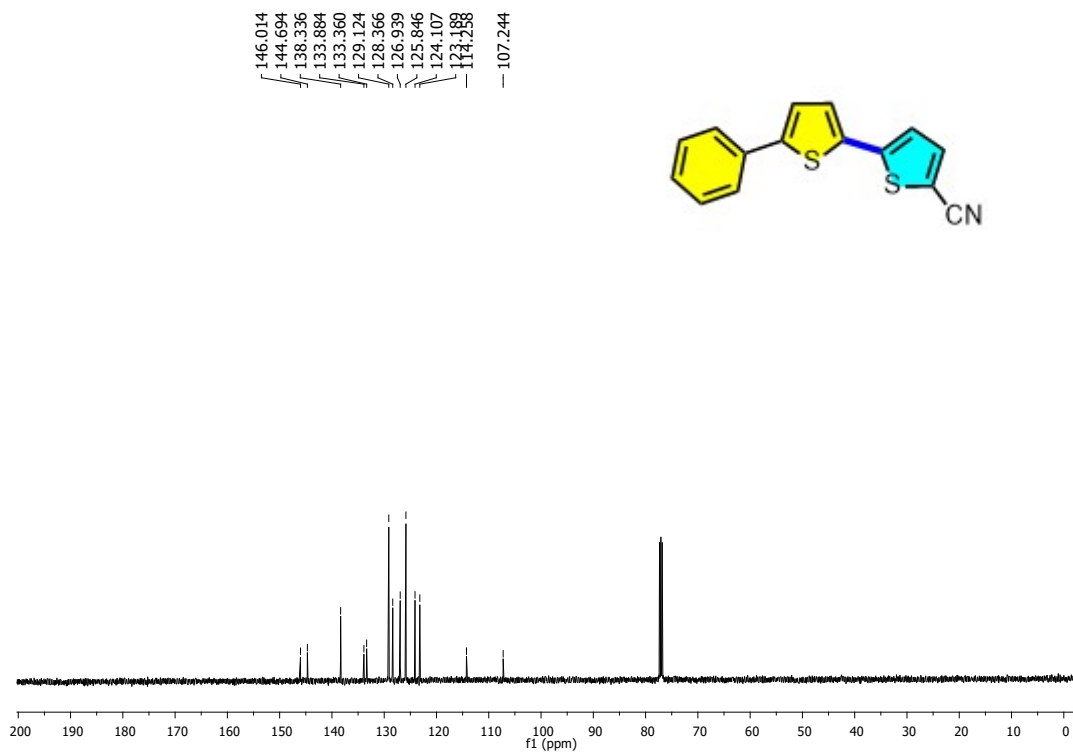

**Figure s28:**  $^{13}\text{C}\{^1\text{H}\}$  NMR spectrum of compound **3ab**.



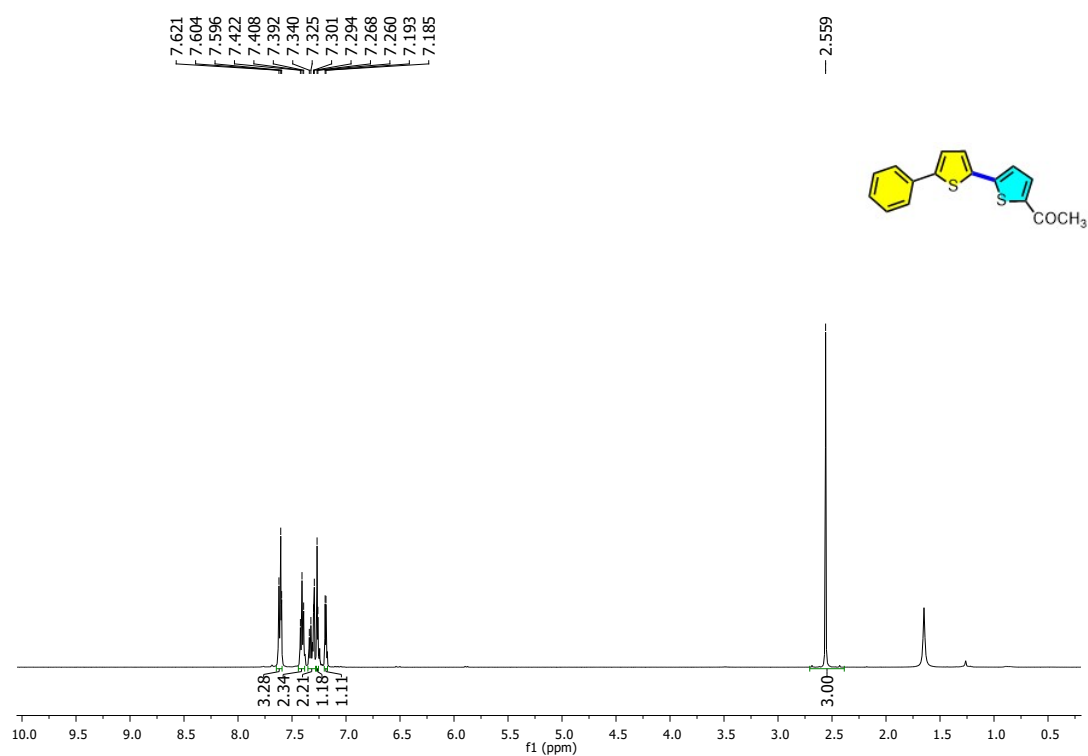

Figure s29: <sup>1</sup>H NMR spectrum of compound 3ac.

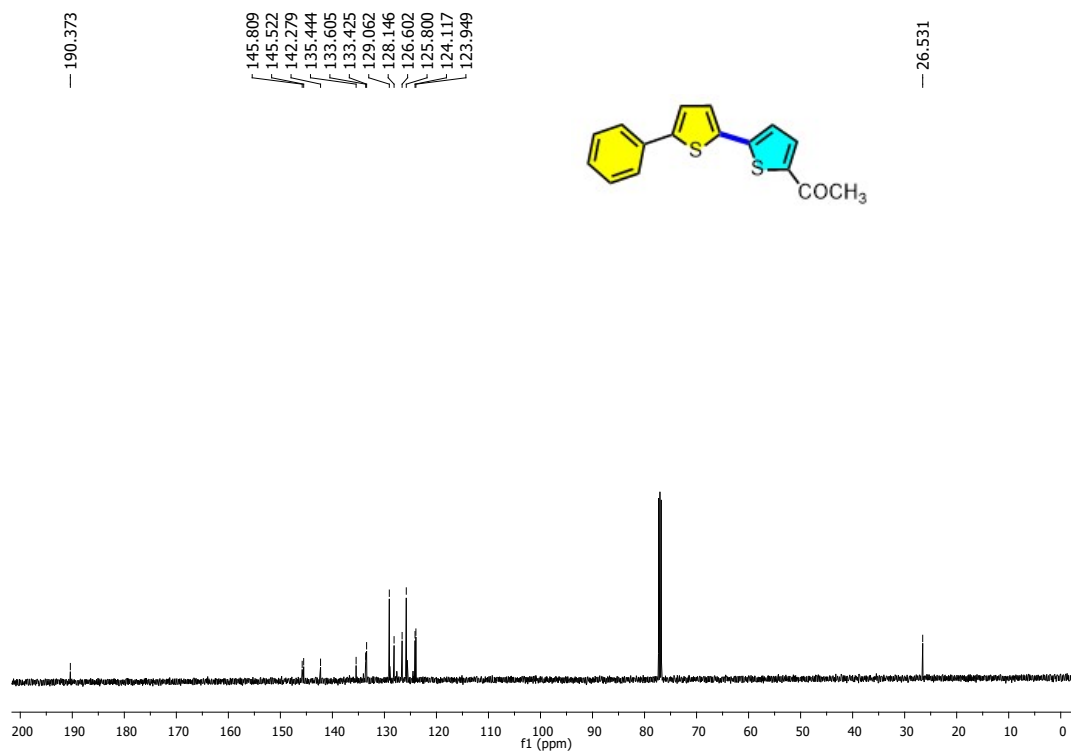

Figure s30: <sup>13</sup>C{<sup>1</sup>H} NMR spectrum of compound 3ac.

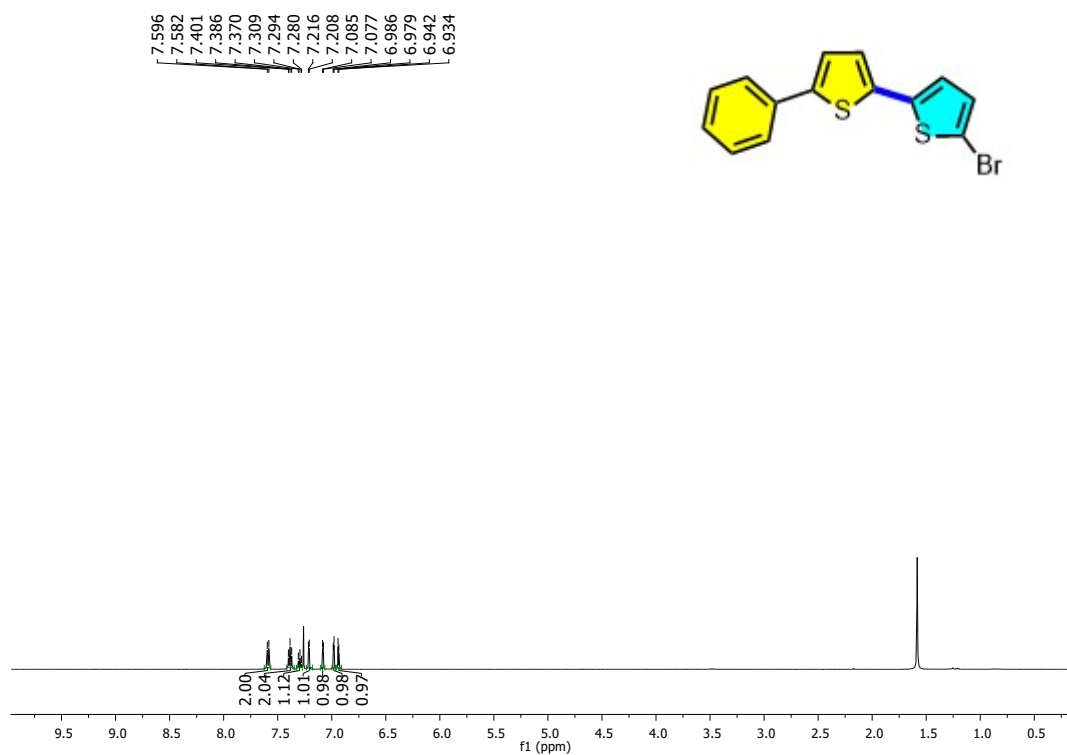

Figure s31:  $^1\text{H}$  NMR spectrum of compound 3ad.

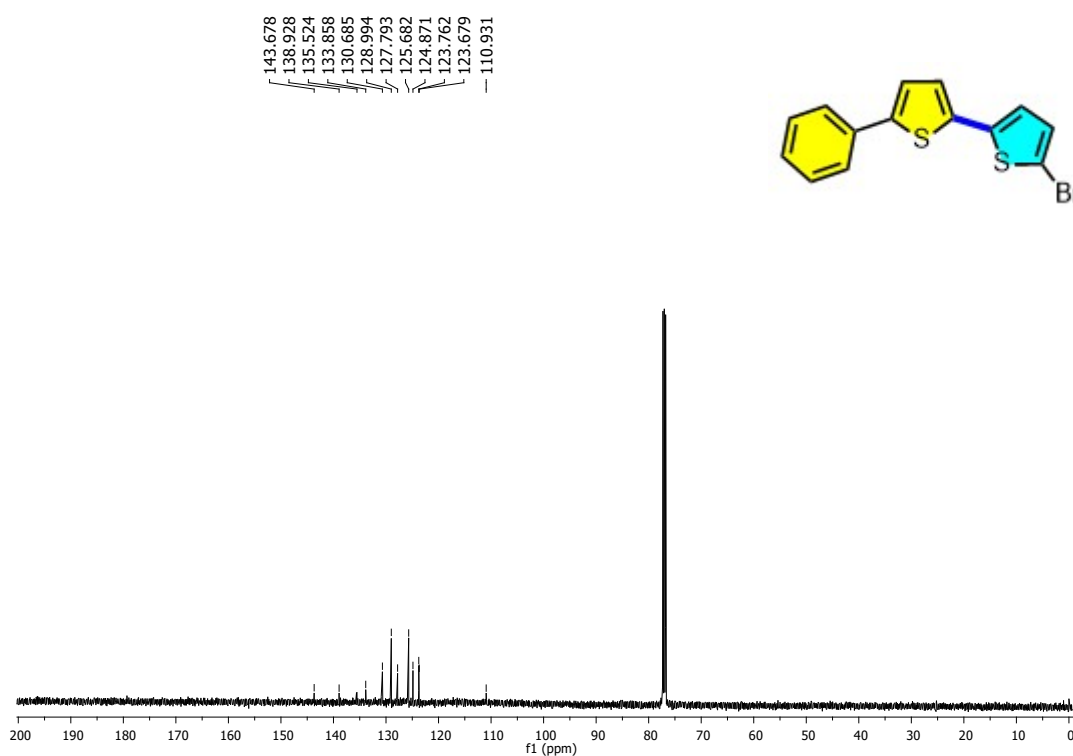

Figure s32:  $^{13}\text{C}\{^1\text{H}\}$  NMR spectrum of compound 3ad.

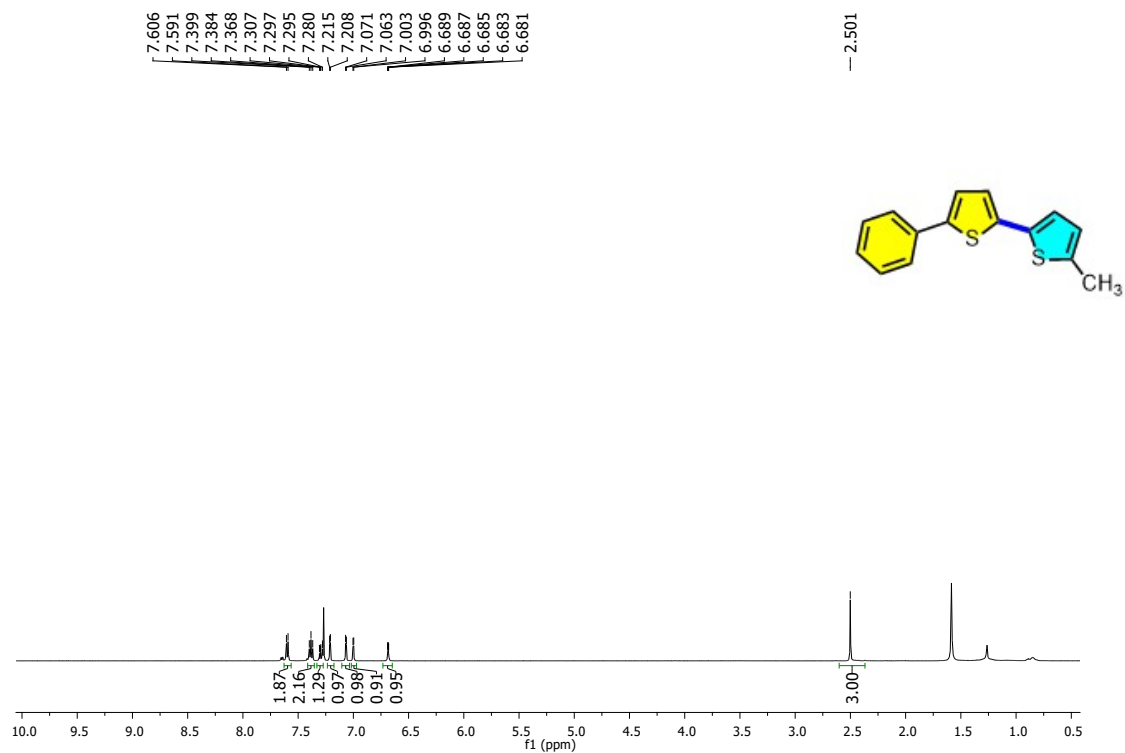

Figure s33:  $^1\text{H}$  NMR spectrum of compound 3ae.

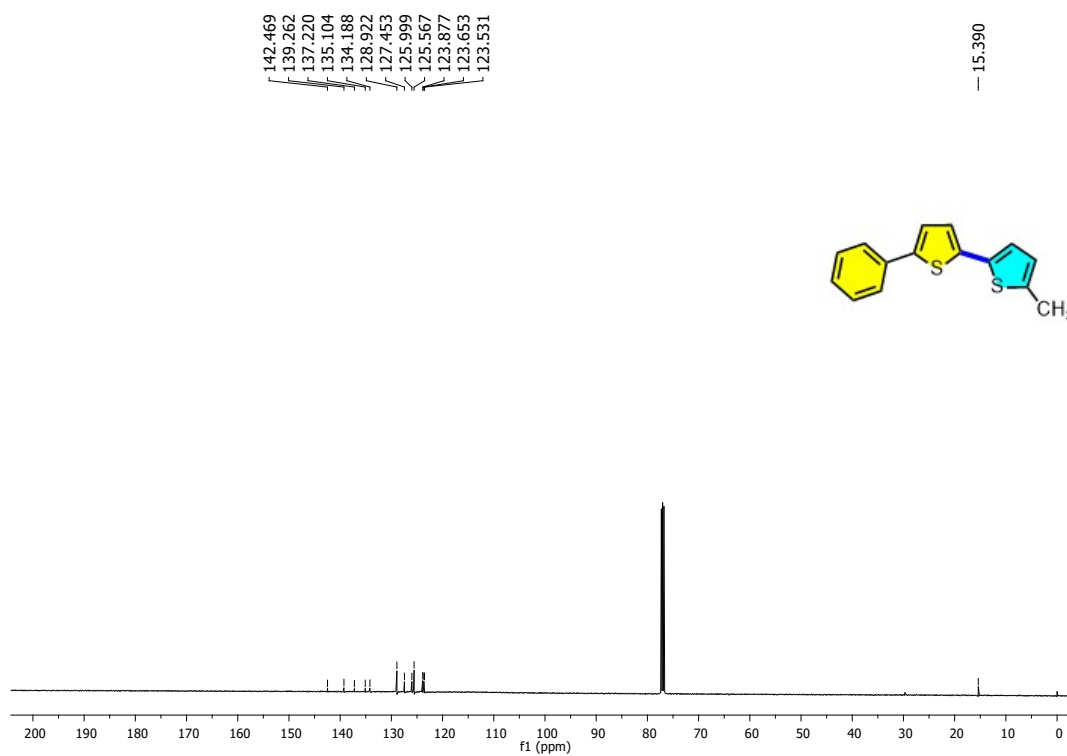

Figure s34:  $^{13}\text{C}\{^1\text{H}\}$  NMR spectrum of compound 3ae.

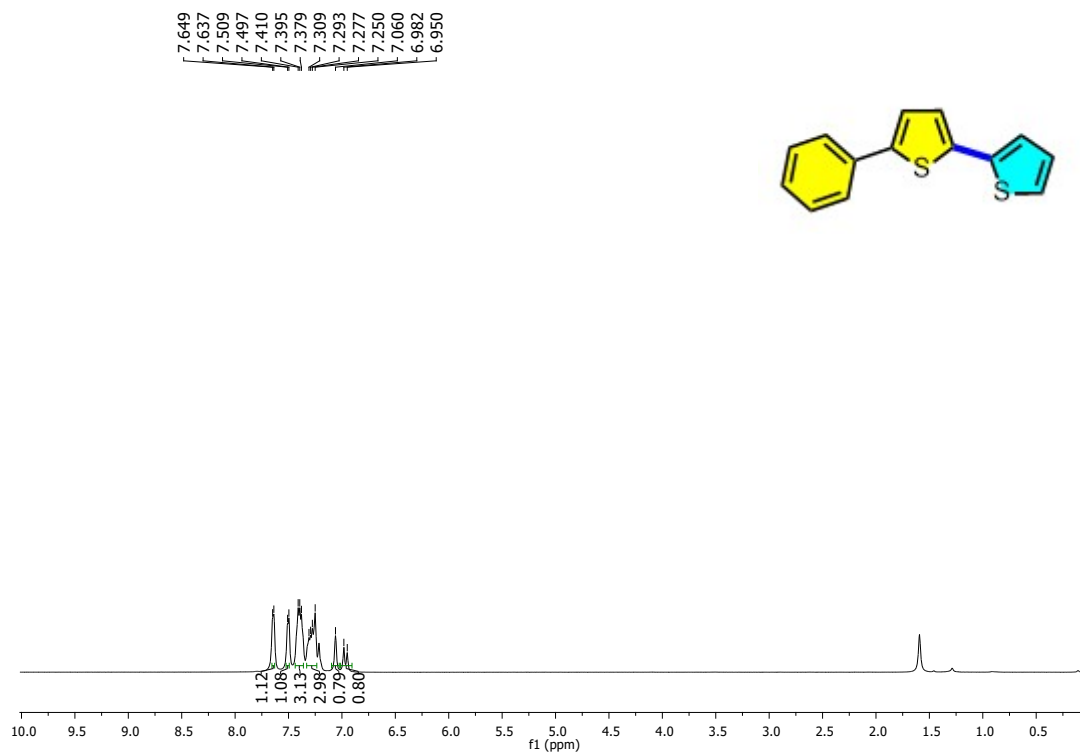

Figure s35:  $^1\text{H}$  NMR spectrum of compound **3af**.

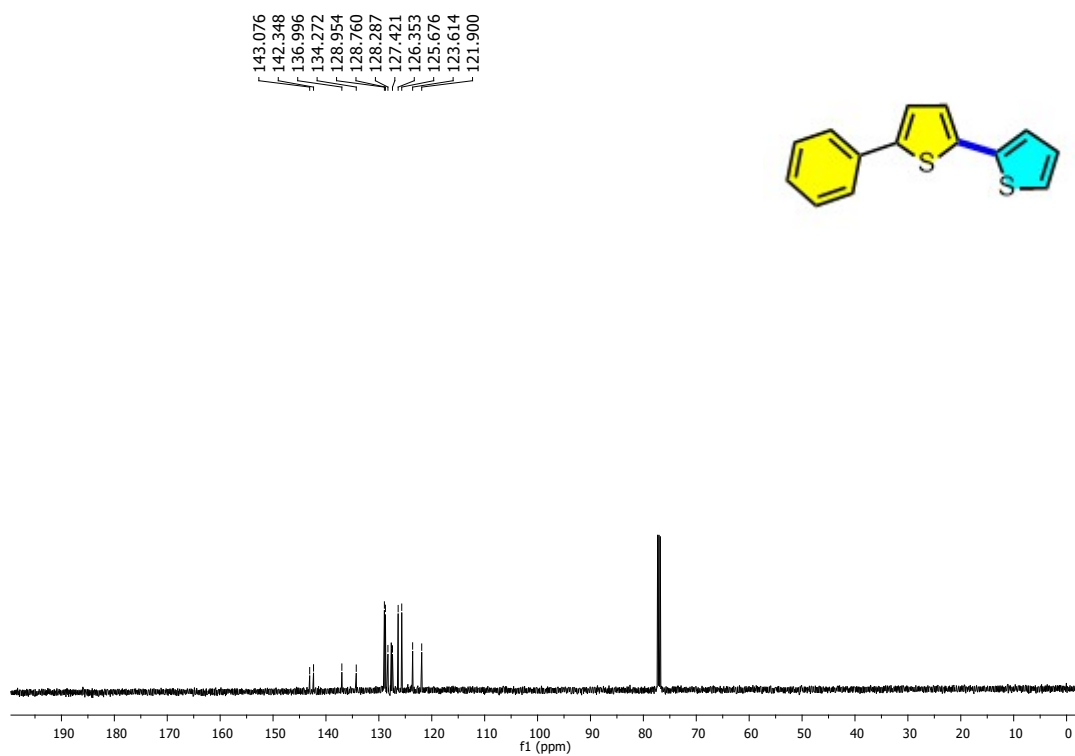

Figure s36:  $^{13}\text{C}\{^1\text{H}\}$  NMR spectrum of compound **3af**.

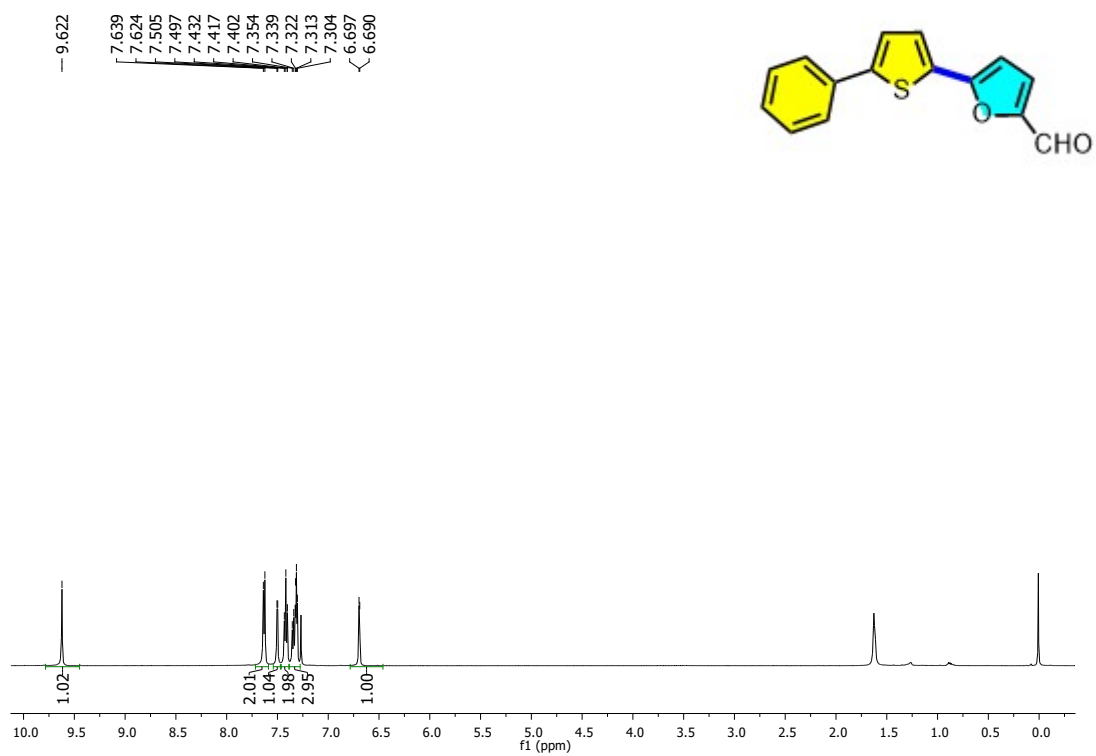

Figure s37:  $^1\text{H}$  NMR spectrum of compound **3ag**.

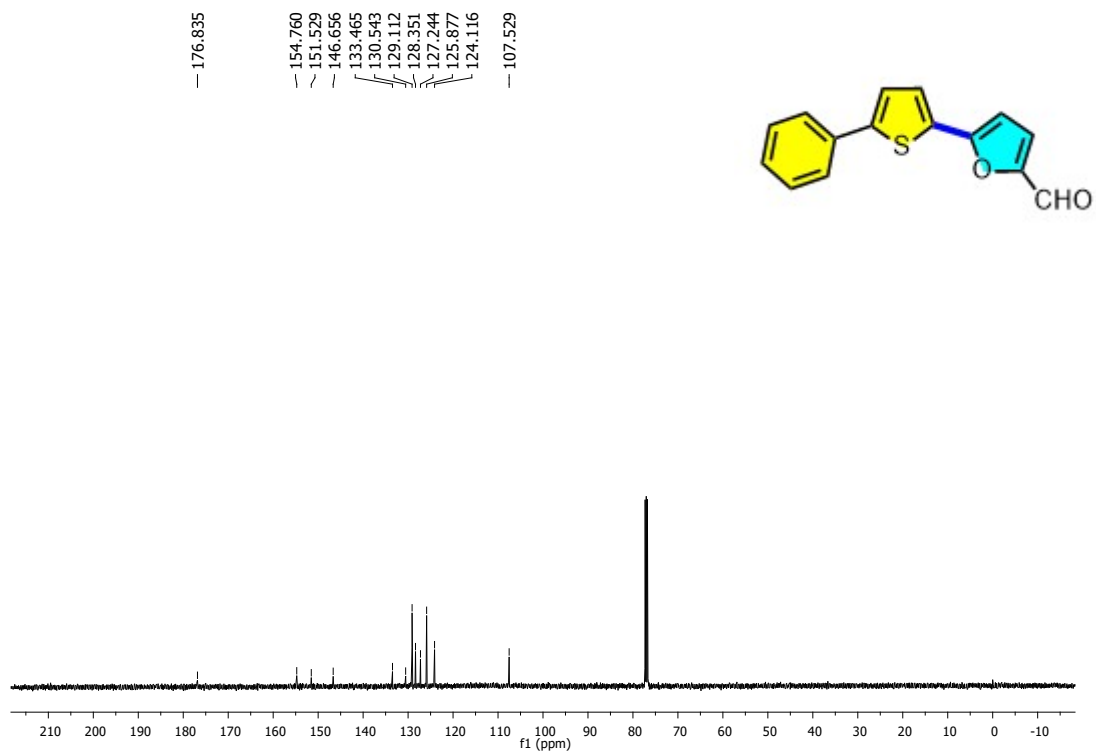

Figure s38:  $^{13}\text{C}\{^1\text{H}\}$  NMR spectrum of compound **3ag**.

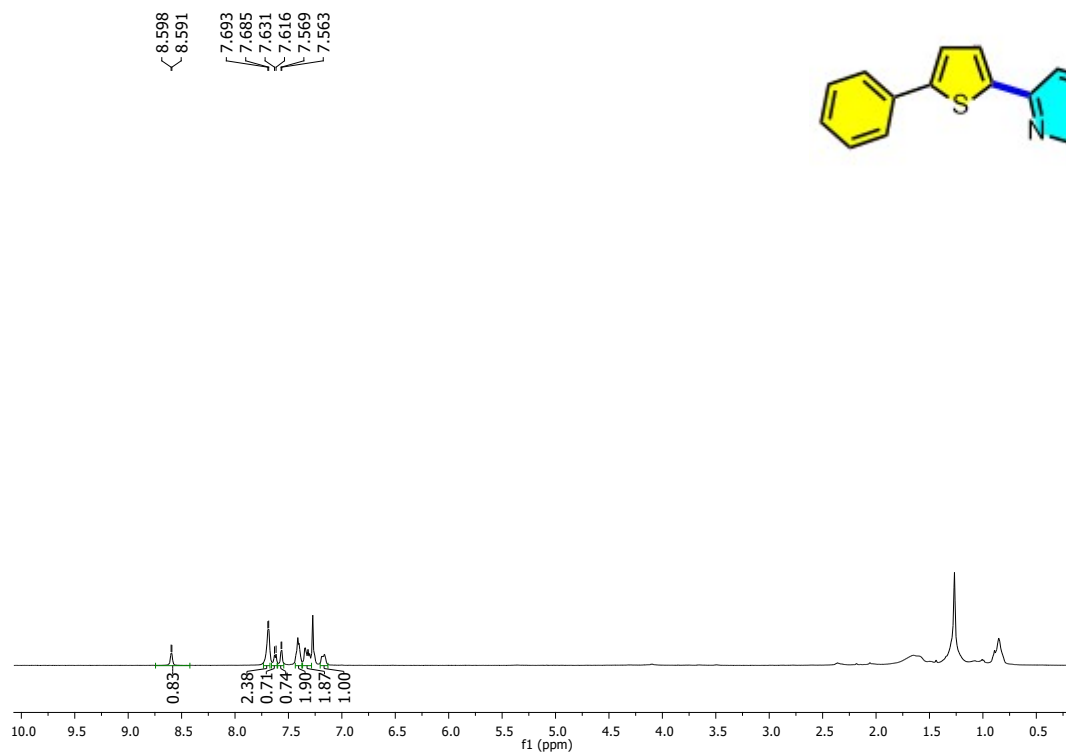

Figure s39:  $^1\text{H}$  NMR spectrum of compound 3ah.

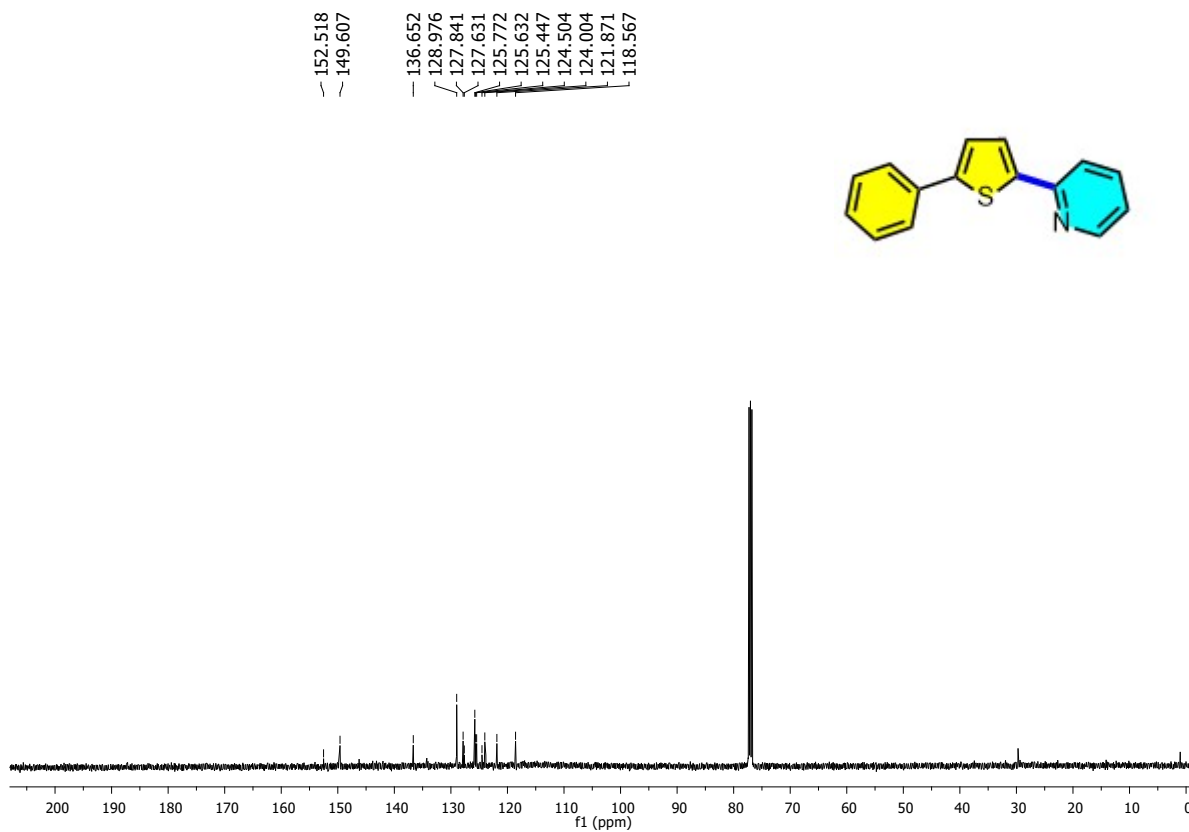

Figure s40:  $^{13}\text{C}\{^1\text{H}\}$  NMR spectrum of compound 3ah.

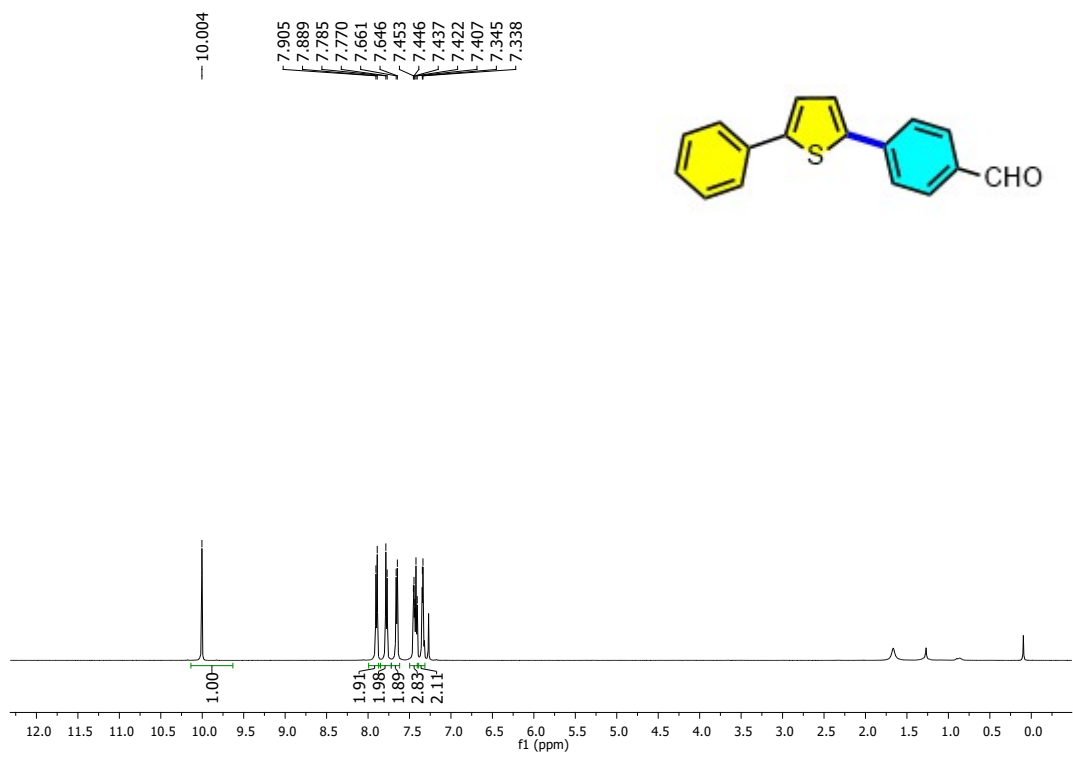

Figure s41:  $^1\text{H}$  NMR spectrum of compound 3ai.

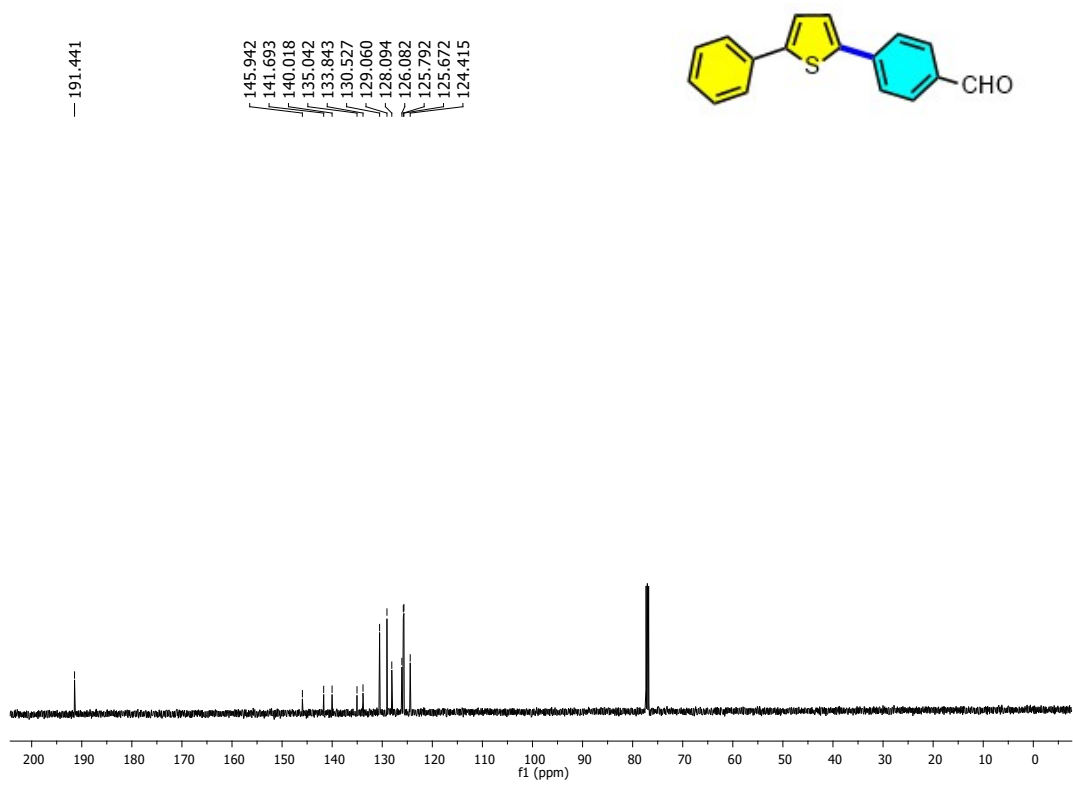

Figure s42:  $^{13}\text{C}\{^1\text{H}\}$  NMR spectrum of compound 3ai.

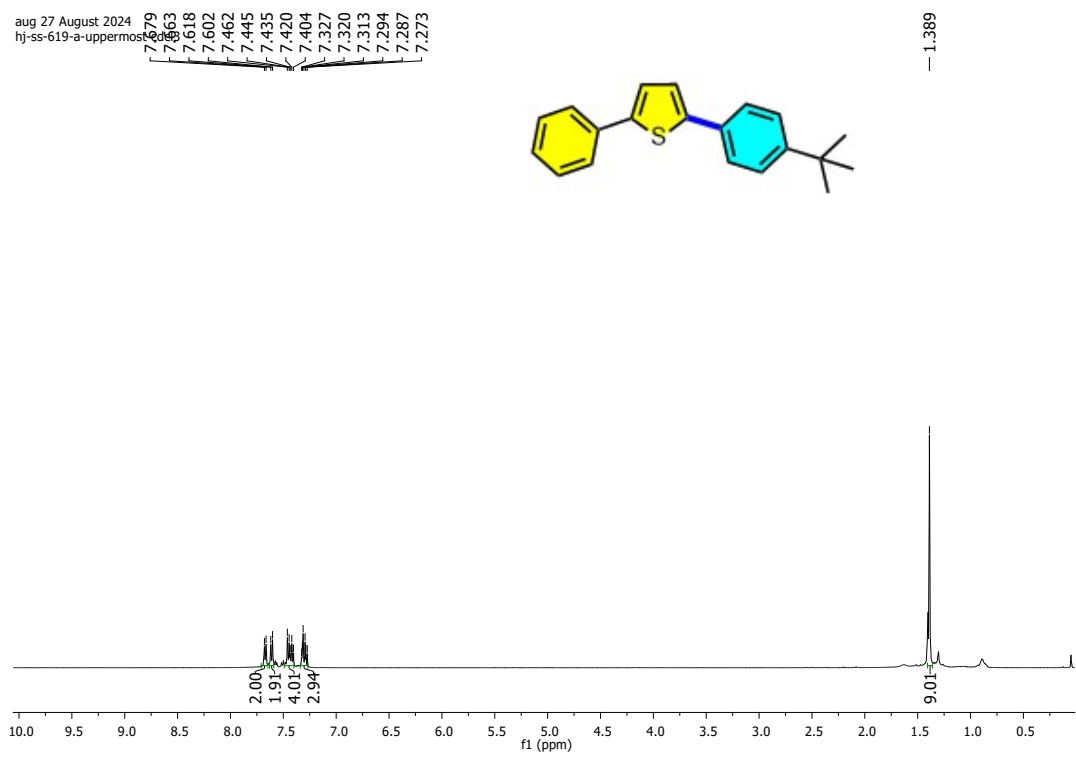

**Figure s43:**  $^1\text{H}$  NMR spectrum of compound **3aj**.

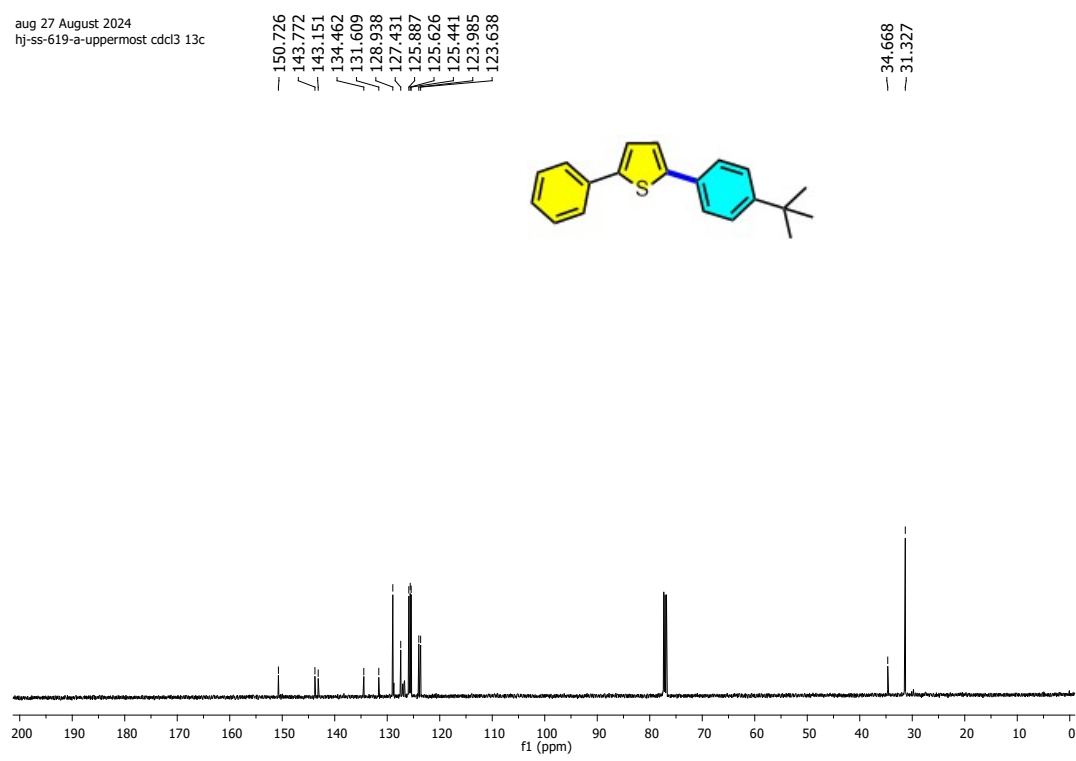

**Figure s44:**  $^{13}\text{C}\{^1\text{H}\}$  NMR spectrum of compound **3aj**.



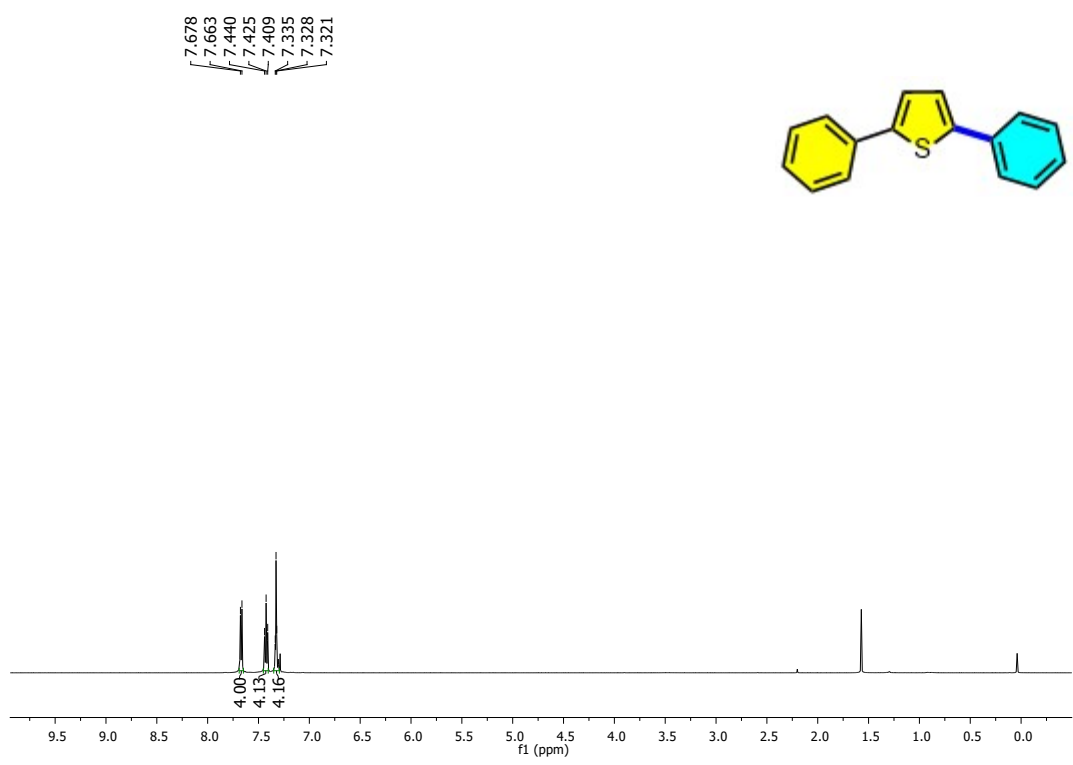

**Figure s45:**  $^1\text{H}$  NMR spectrum of compound **3ak**.

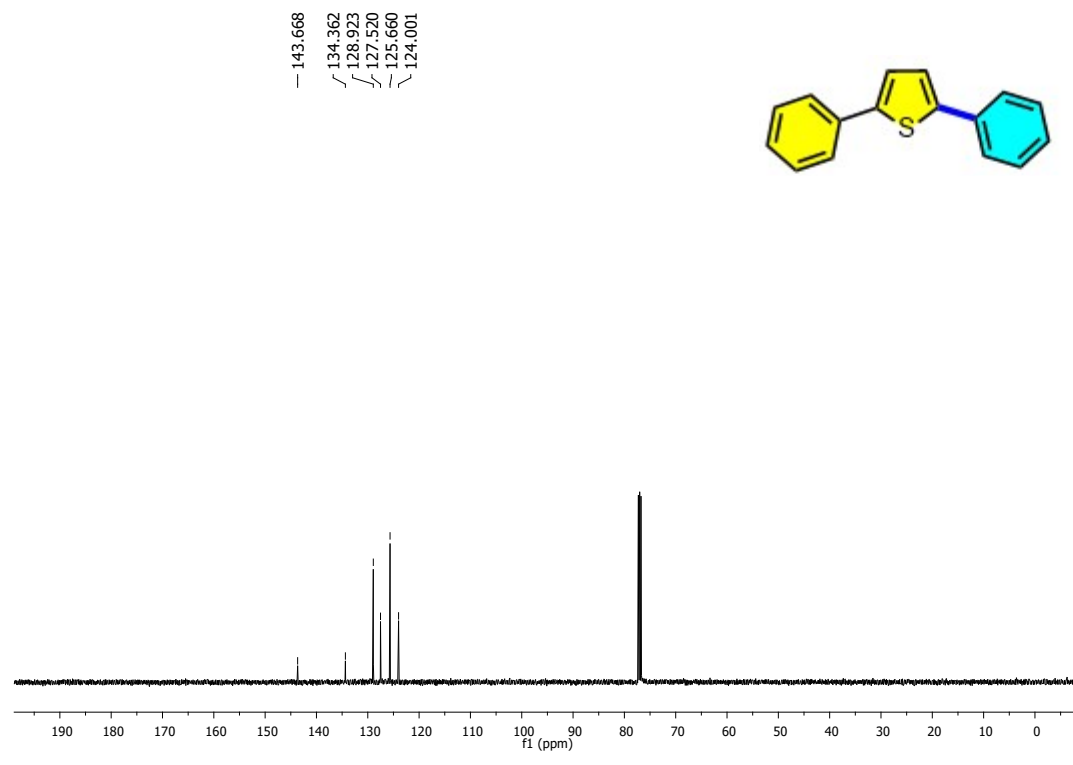

**Figure s46:**  $^{13}\text{C}\{^1\text{H}\}$  NMR spectrum of compound **3ak**.

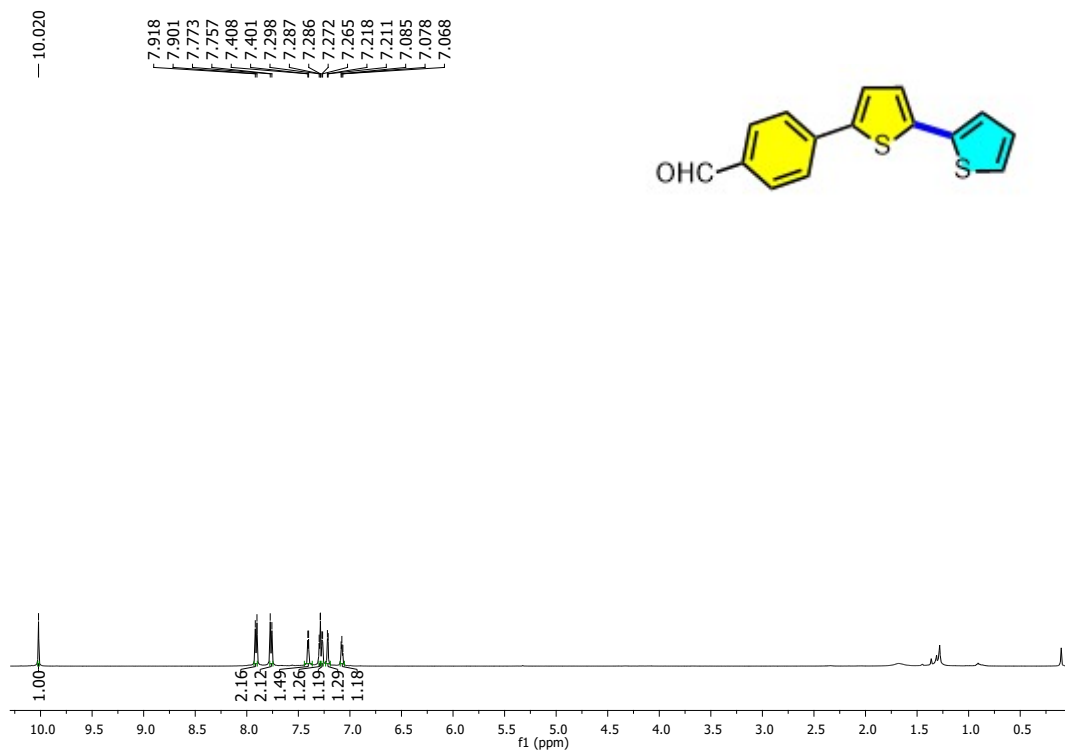

Figure s47:  $^1\text{H}$  NMR spectrum of compound 3bf.

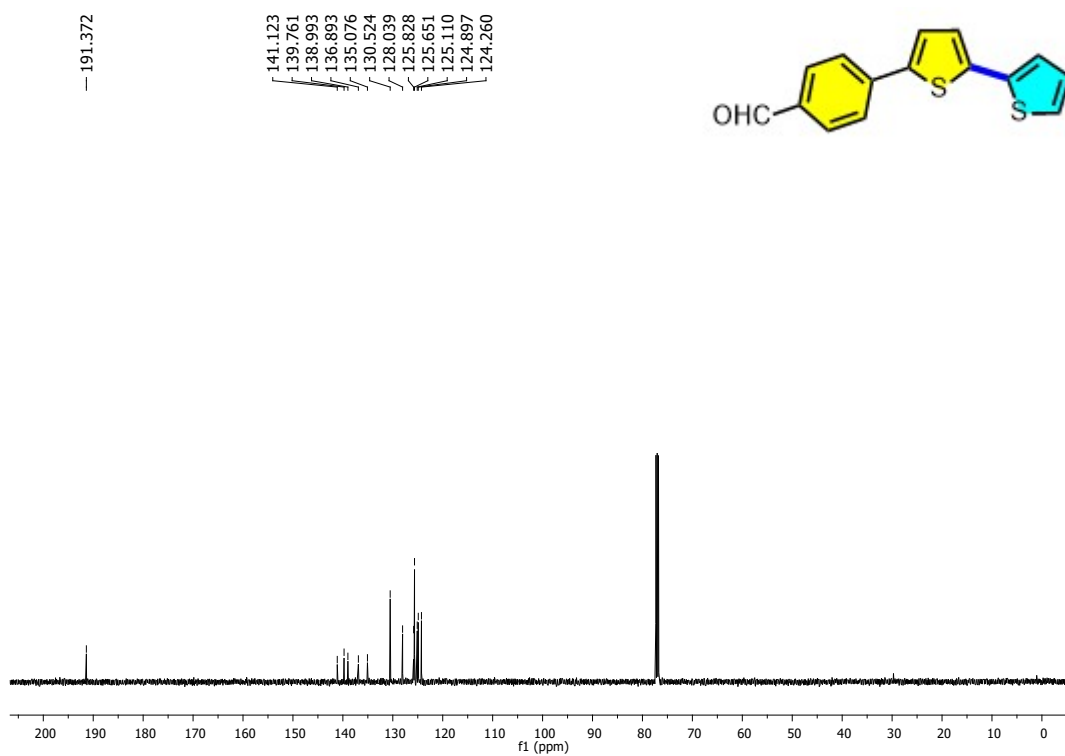

Figure s48:  $^{13}\text{C}\{^1\text{H}\}$  NMR spectrum of compound 3bf.

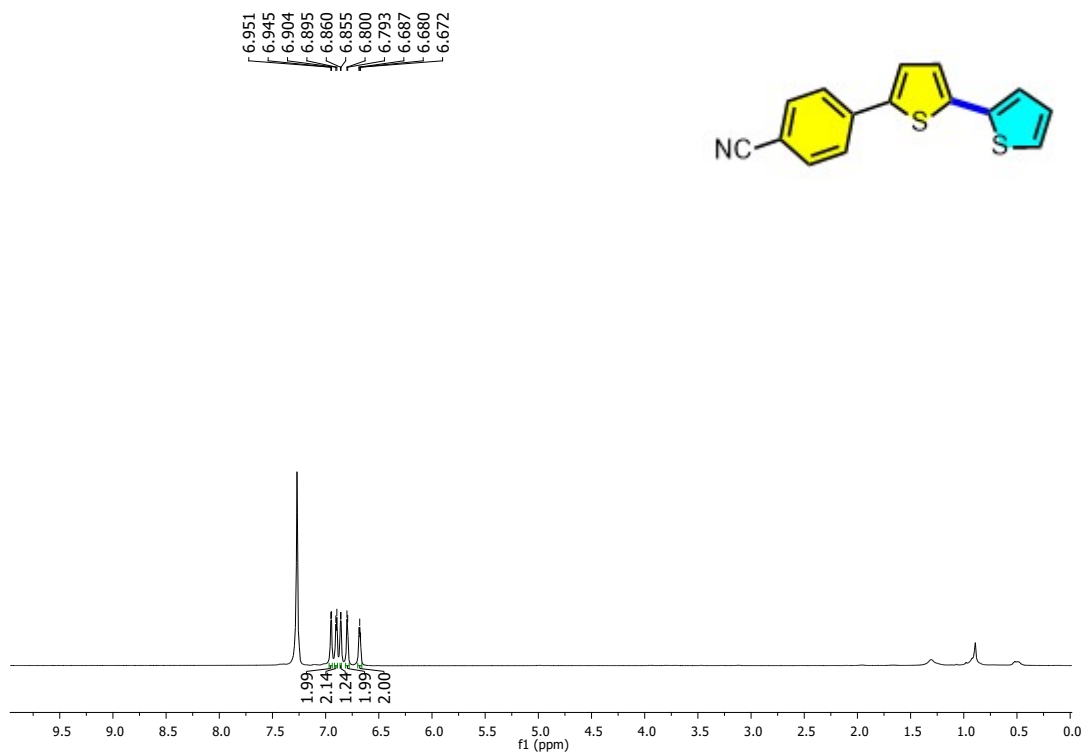

**Figure s49:**  $^1\text{H}$  NMR spectrum of compound **3cf**.

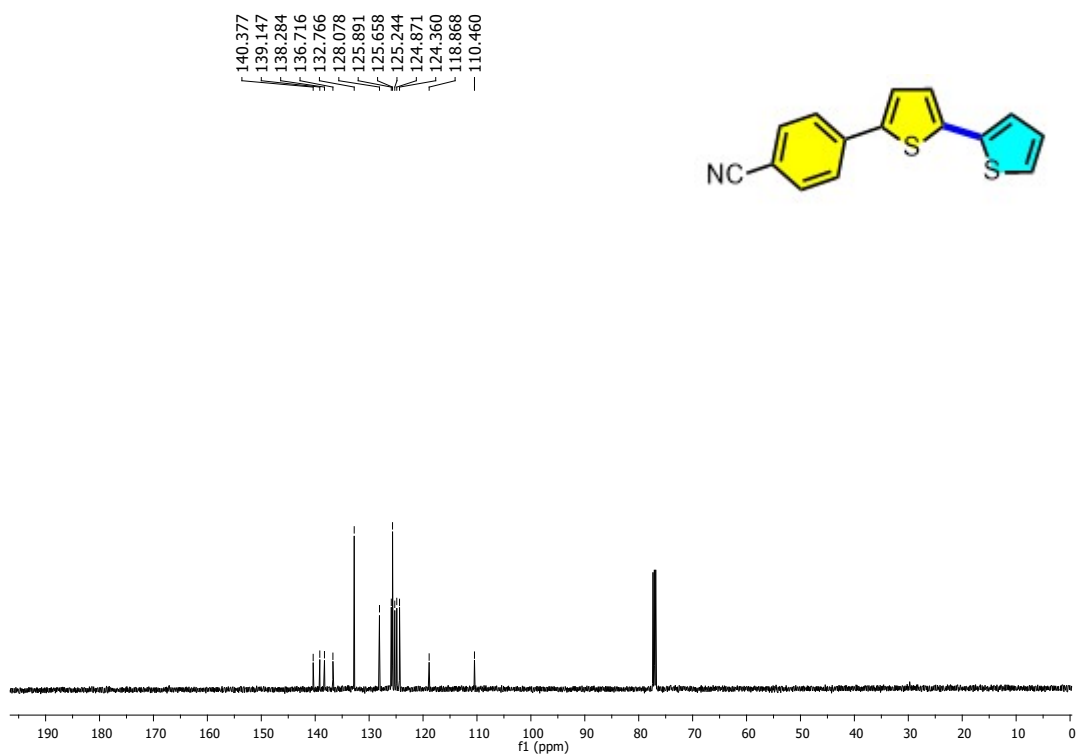

**Figure s50:**  $^{13}\text{C}\{^1\text{H}\}$  NMR spectrum of compound **3cf**.

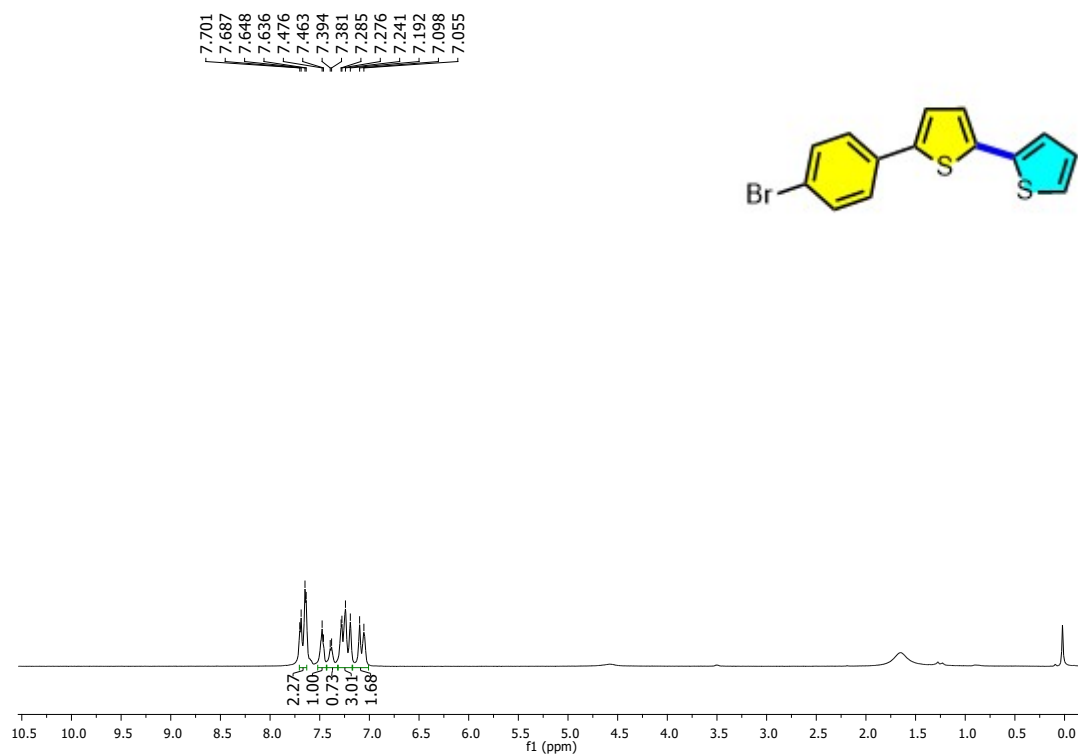

Figure s51:  $^1\text{H}$  NMR spectrum of compound **3df**.

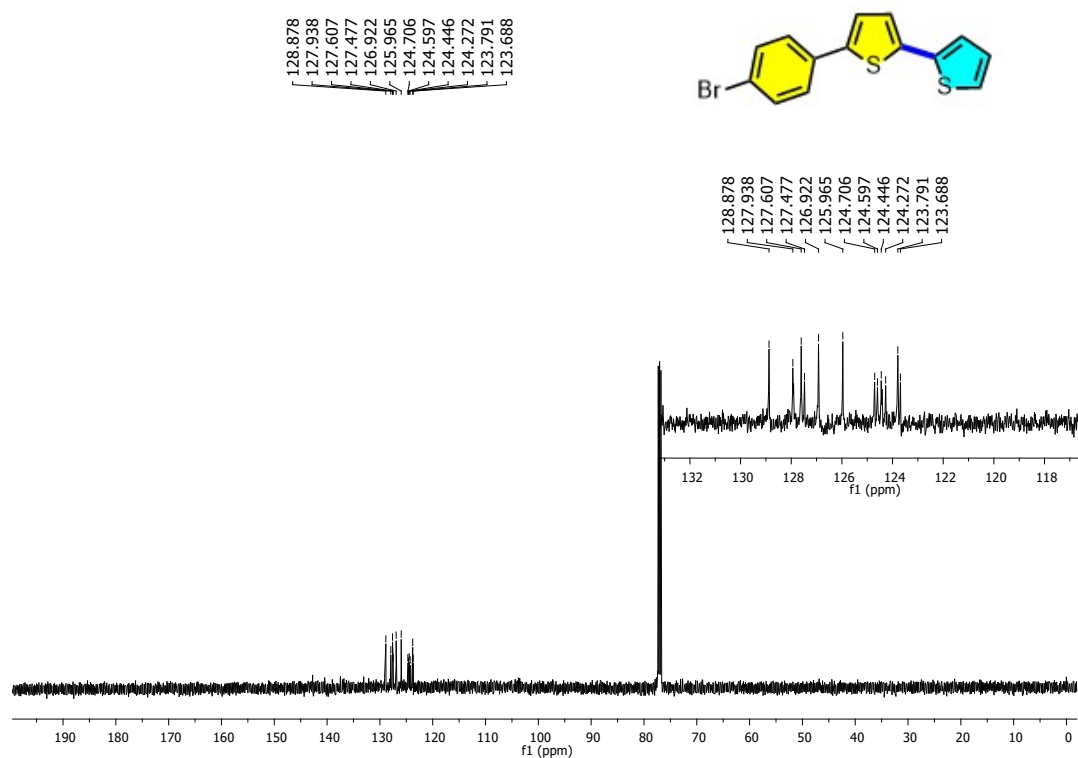

Figure s52:  $^{13}\text{C}\{^1\text{H}\}$  NMR spectrum of compound **3df**.

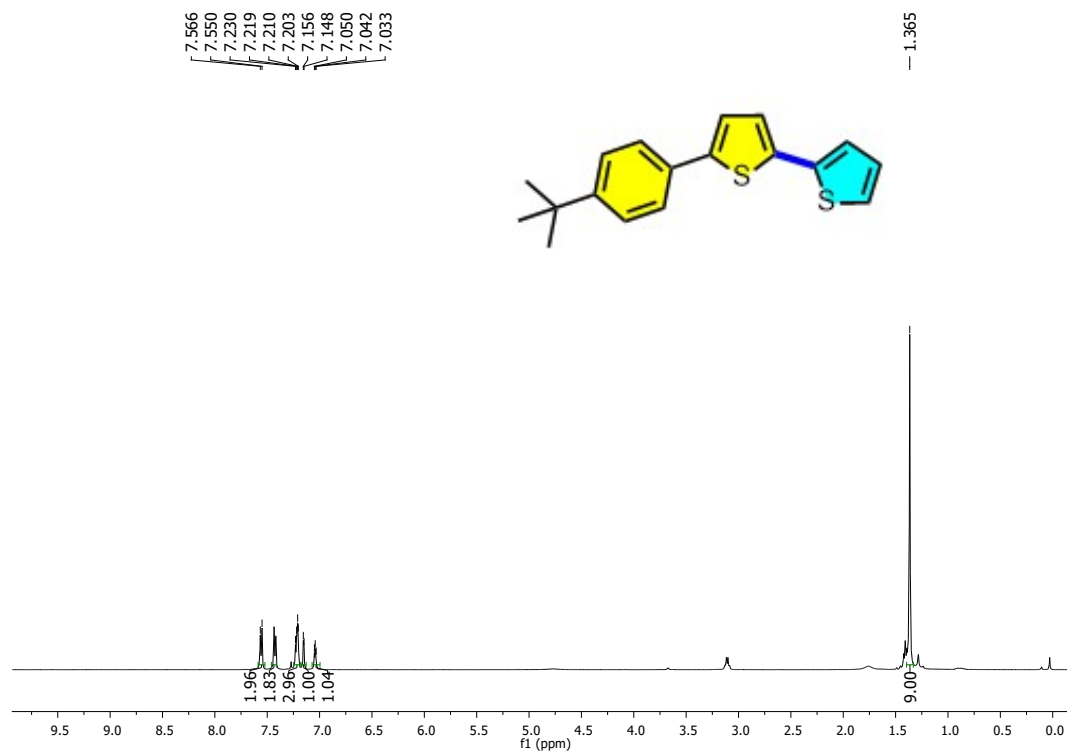

Figure s53:  $^1\text{H}$  NMR spectrum of compound 3ef.

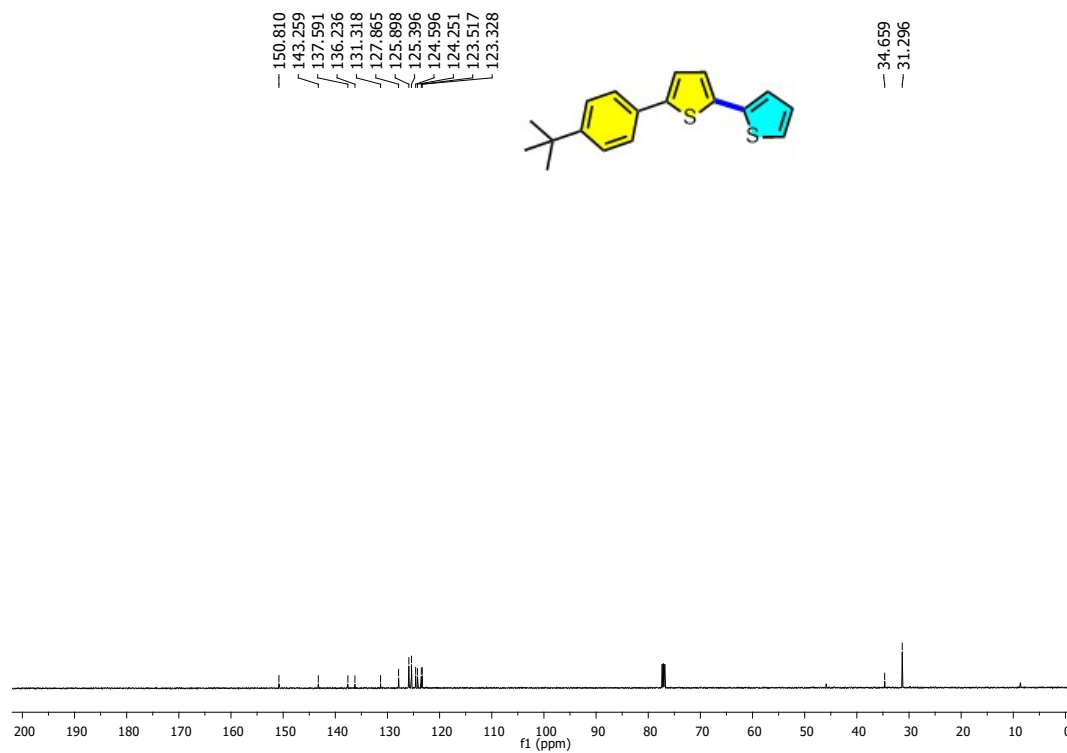

Figure s54:  $^{13}\text{C}$   $\{^1\text{H}\}$  NMR spectrum of compound 3ef.

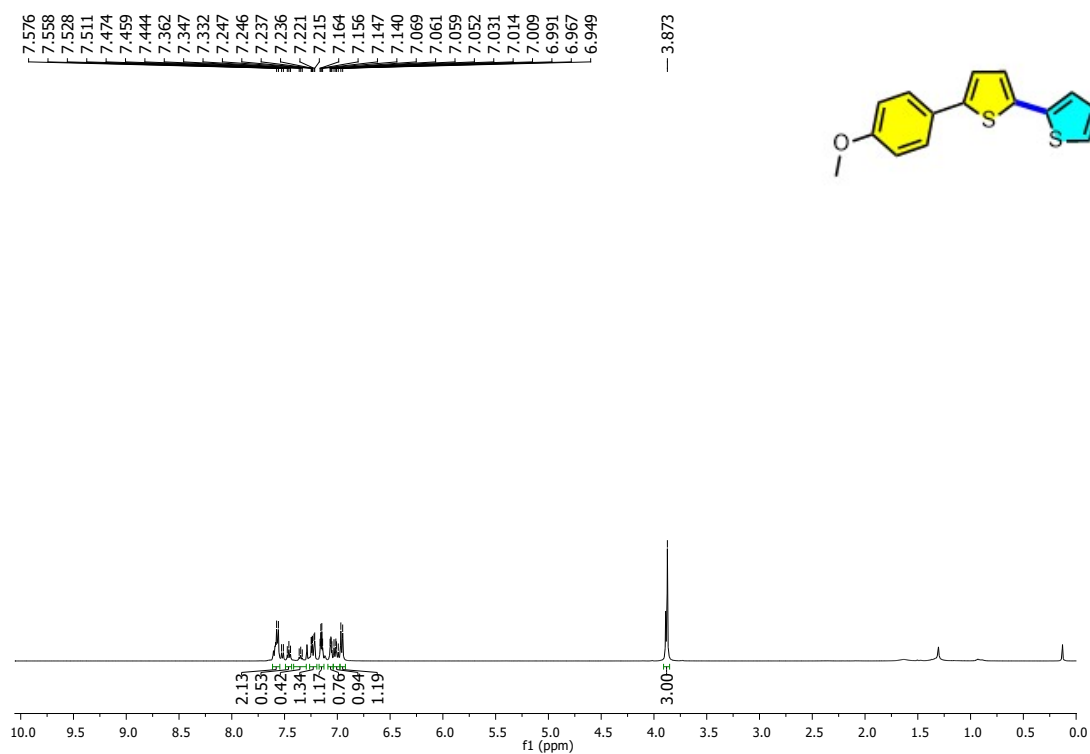

Figure s55:  $^1\text{H}$  NMR spectrum of compound **3ff**.

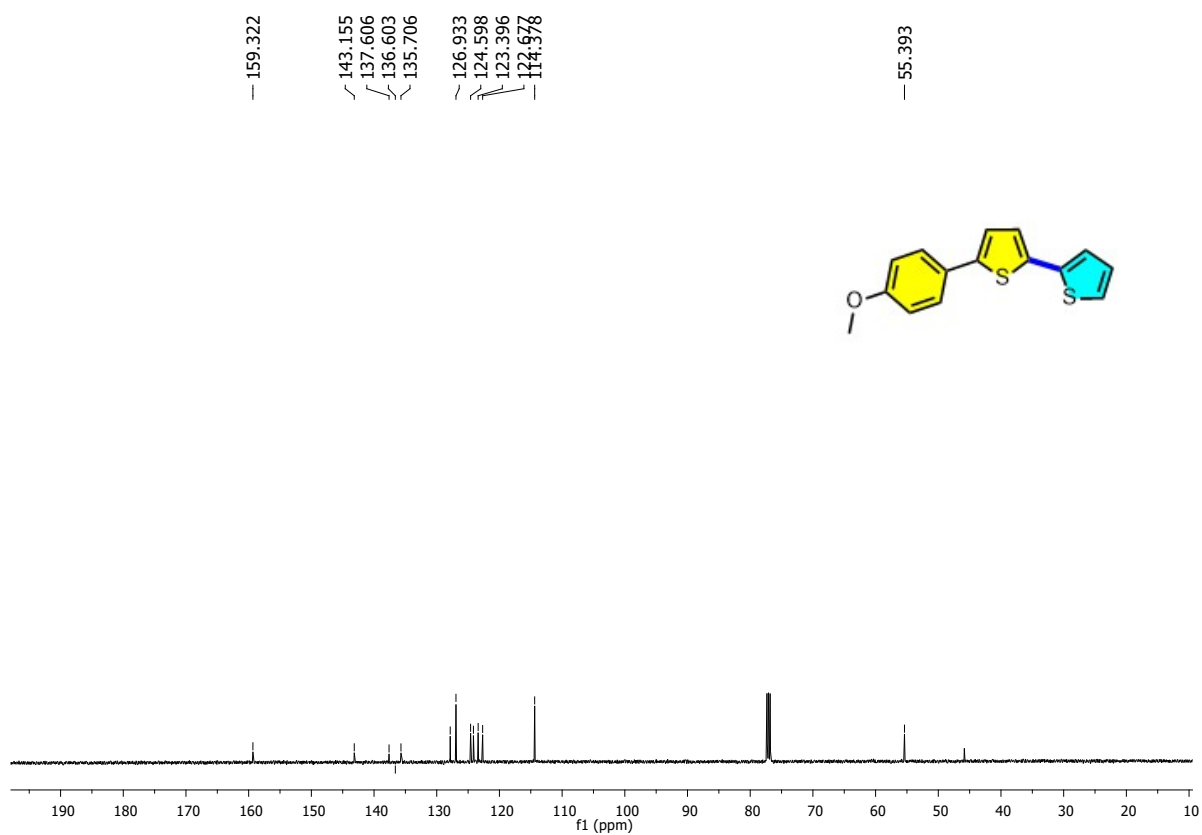

Figure s56:  $^{13}\text{C}\{^1\text{H}\}$  NMR spectrum of compound **3ff**.

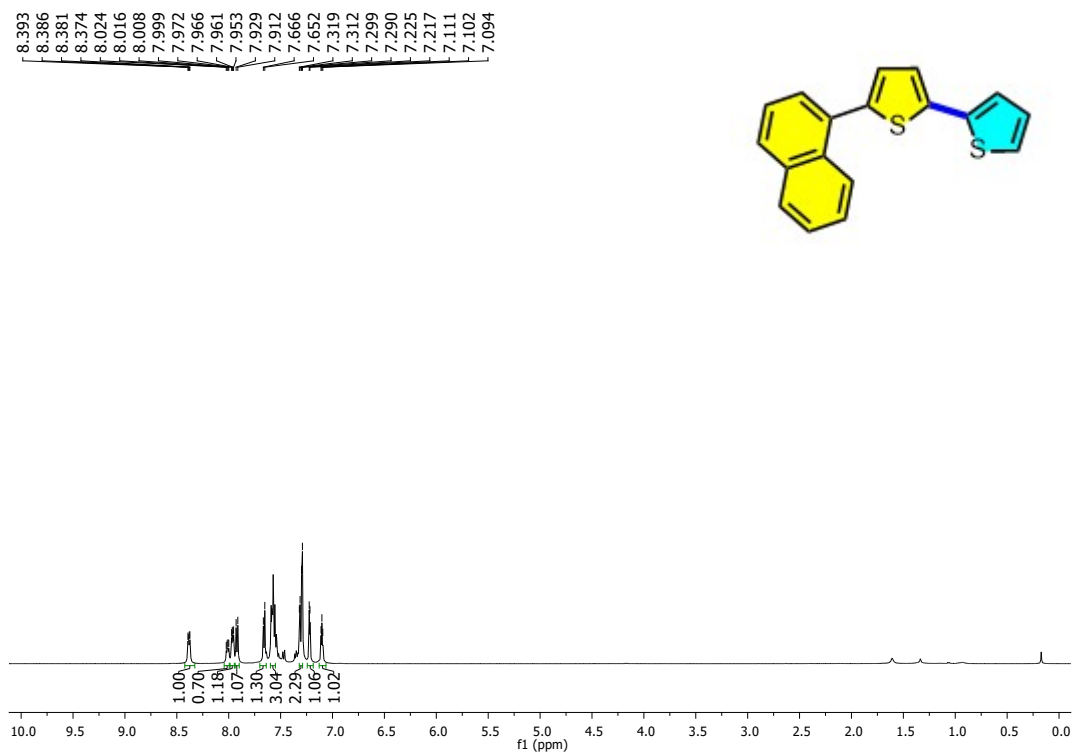

**Figure s57:**  $^1\text{H}$  NMR spectrum of compound **3gf**.

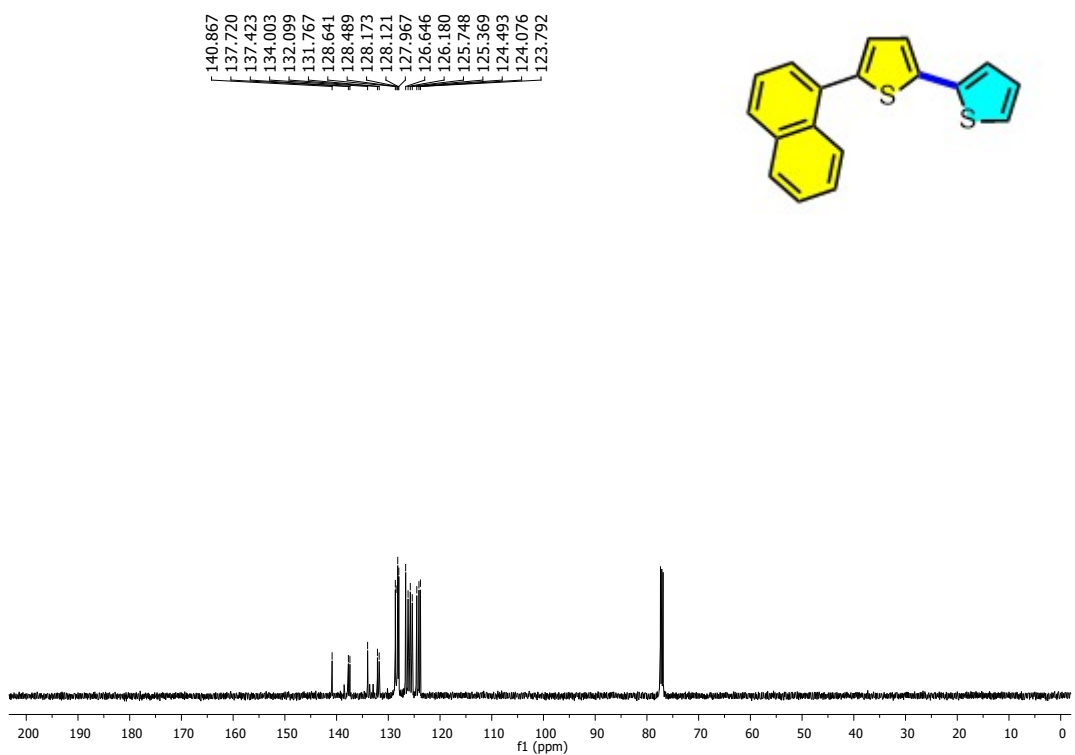

**Figure s58:**  $^{13}\text{C}\{^1\text{H}\}$  NMR spectrum of compound **3gf**.

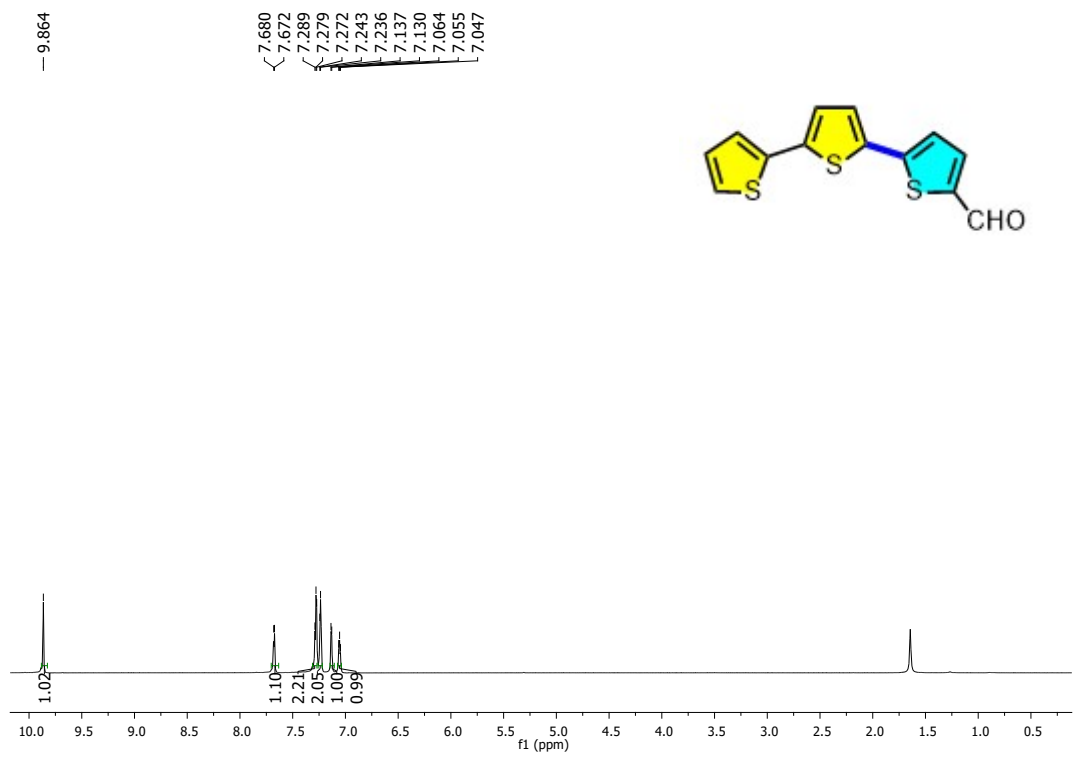

**Figure s59:**  $^1\text{H}$  NMR spectrum of compound **3ha**.

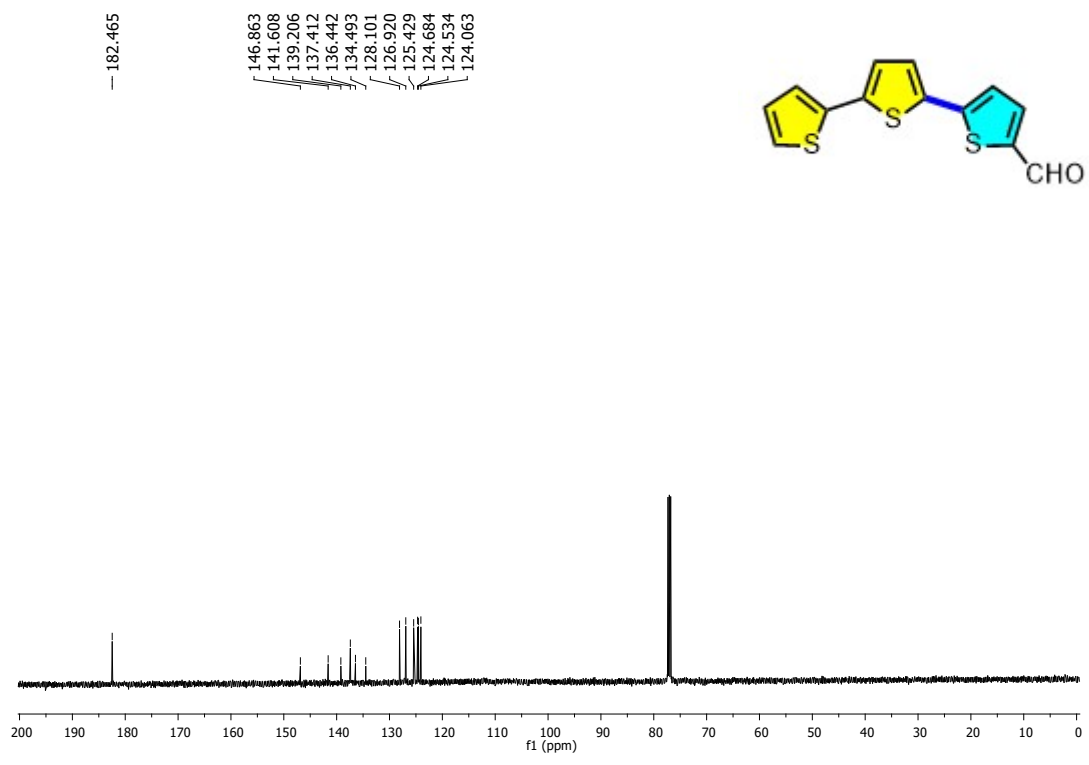

**Figure s60:**  $^{13}\text{C}\{^1\text{H}\}$  NMR spectrum of compound **3ha**.



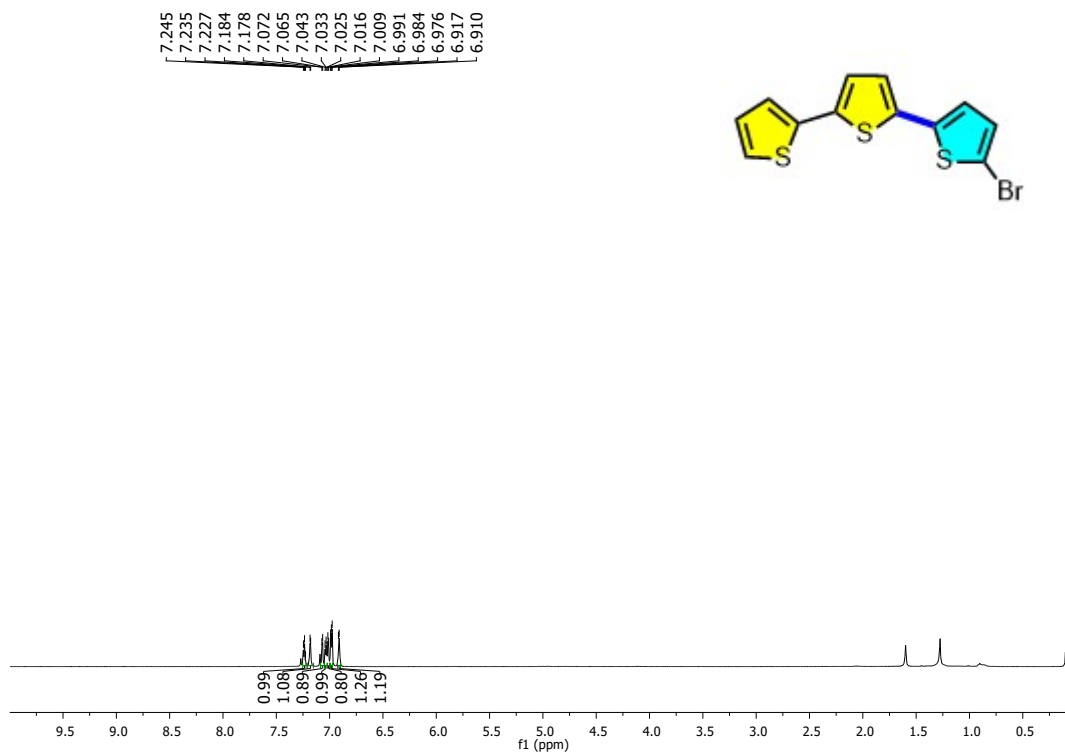

Figure s61:  $^1\text{H}$  NMR spectrum of compound 3hd.

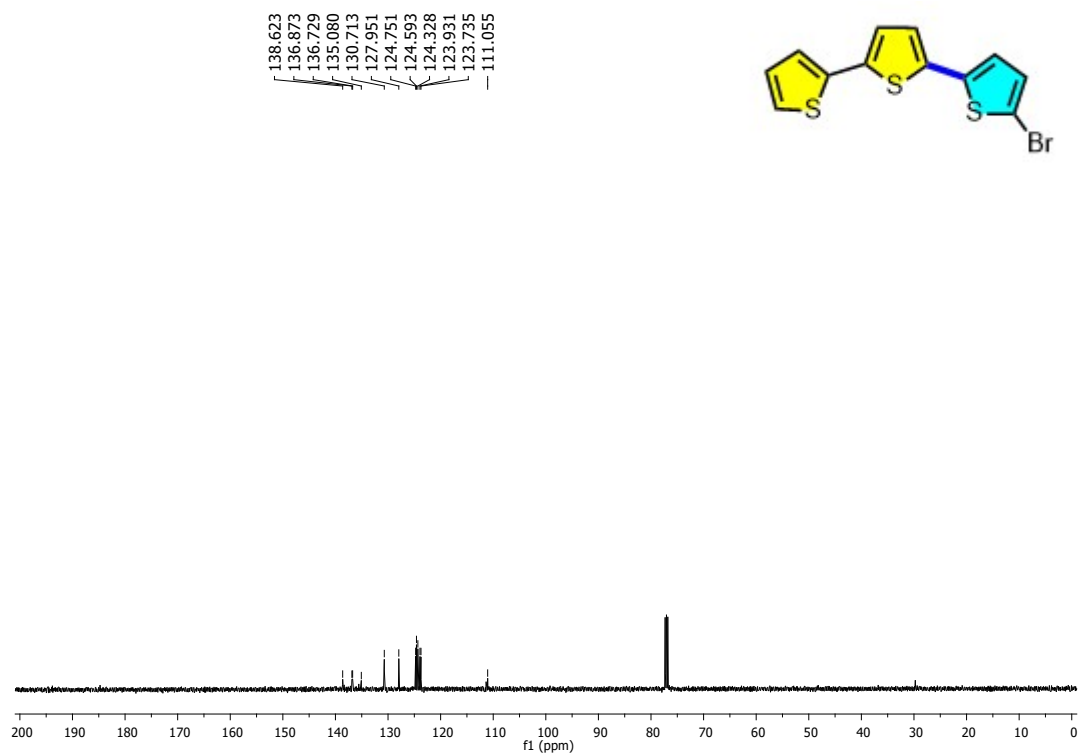

Figure s62:  $^{13}\text{C}\{^1\text{H}\}$  NMR spectrum of compound 3hd.

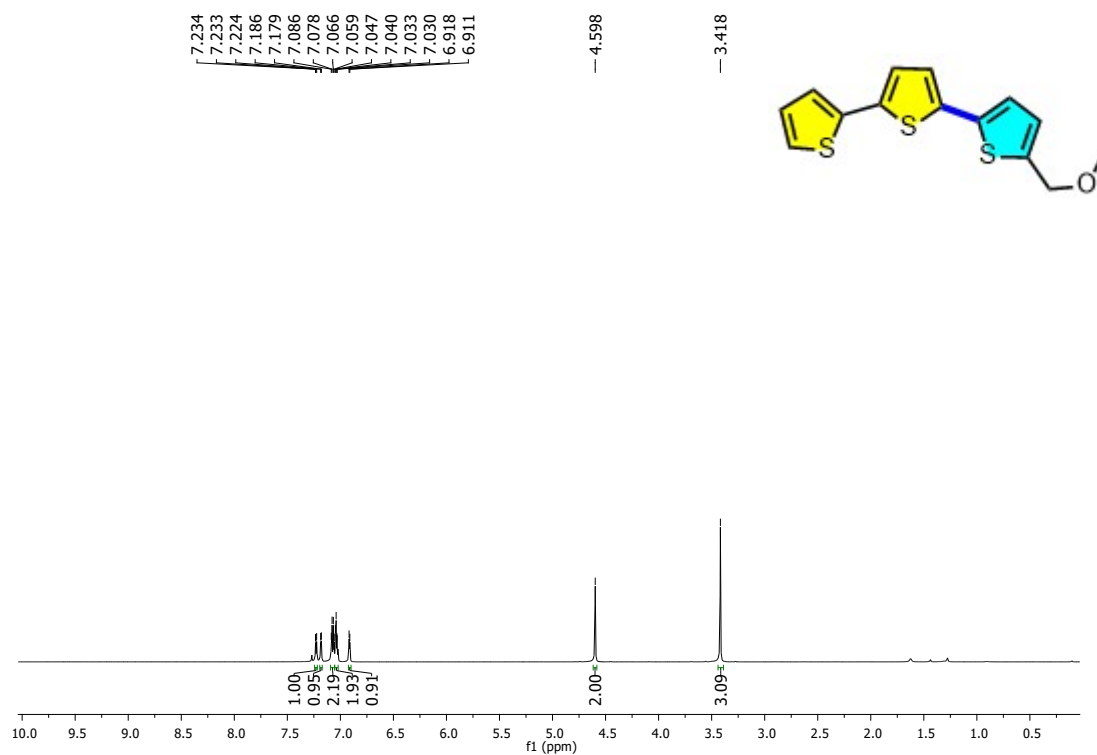

Figure s63:  $^1\text{H}$  NMR spectrum of compound 3hi.

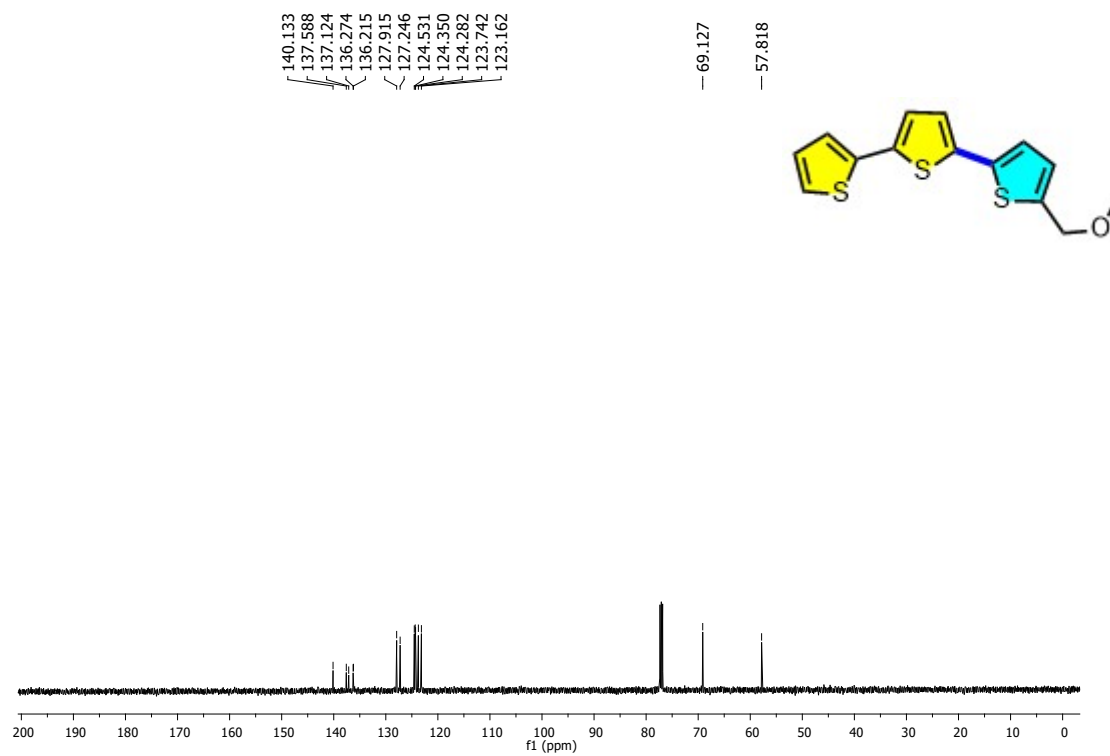

Figure s64:  $^{13}\text{C}\{^1\text{H}\}$  NMR spectrum of compound 3hi.

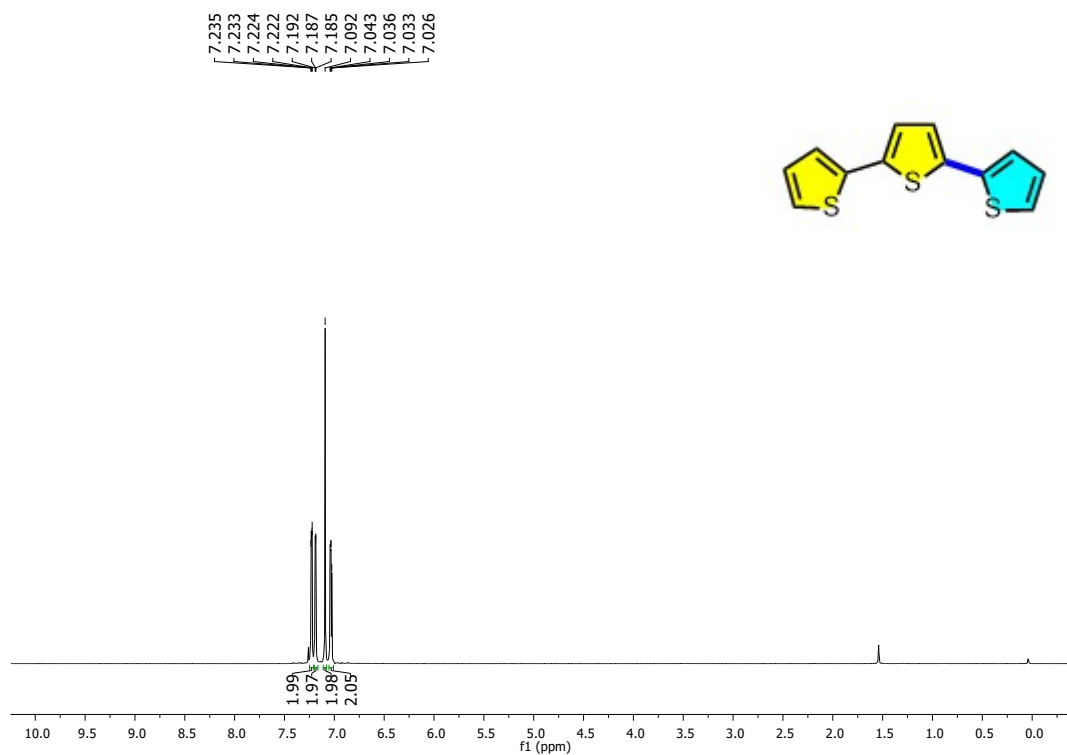

**Figure s65:**  $^1\text{H}$  NMR spectrum of compound **3hf**.

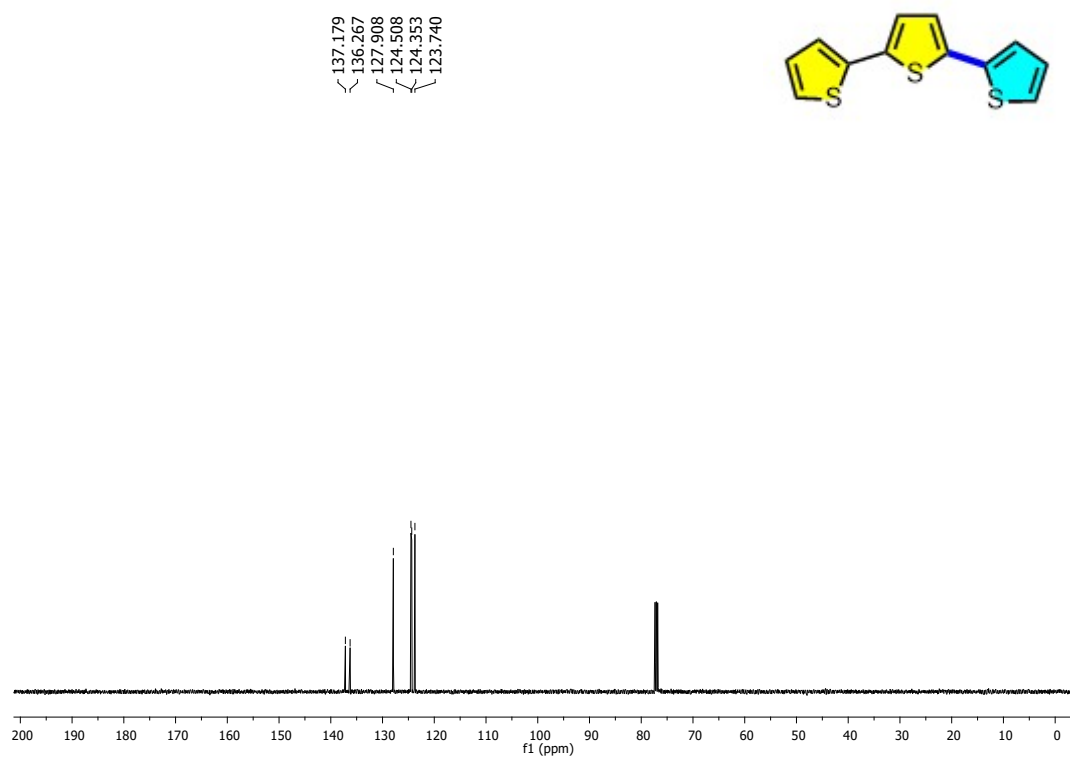

**Figure s66:**  $^{13}\text{C}\{^1\text{H}\}$  NMR spectrum of compound **3hf**.

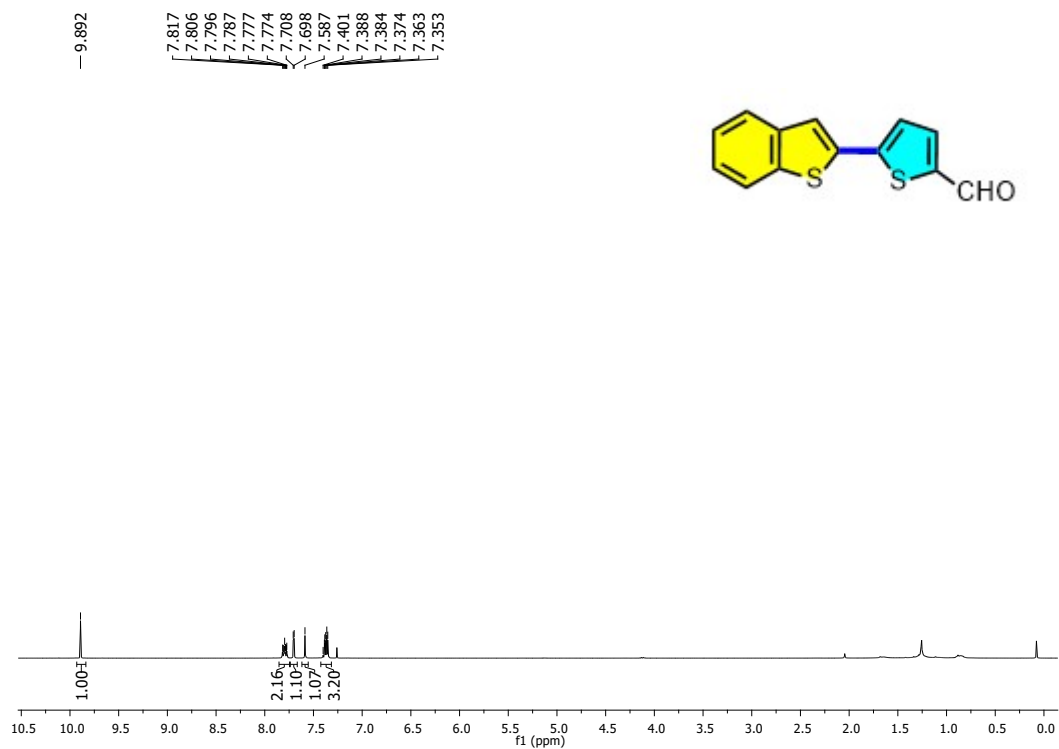

Figure s67:  $^1\text{H NMR}$  spectrum of compound 3ia.

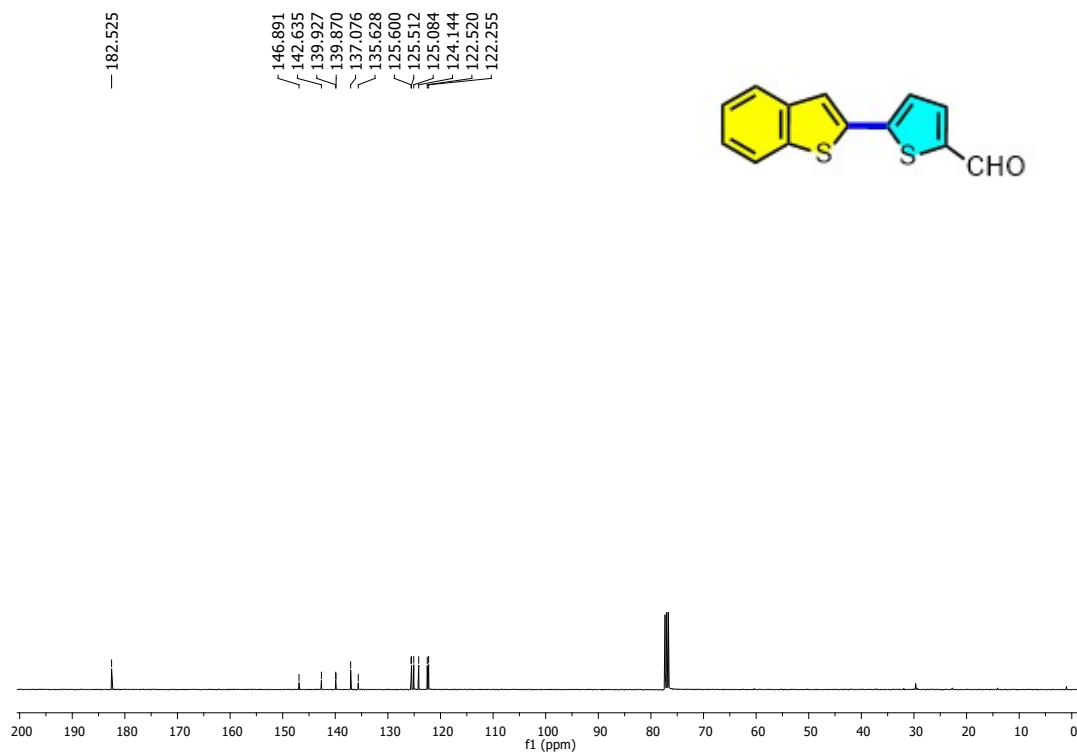

Figure s68:  $^{13}\text{C}\{^1\text{H}\}$  NMR spectrum of compound 3ia.

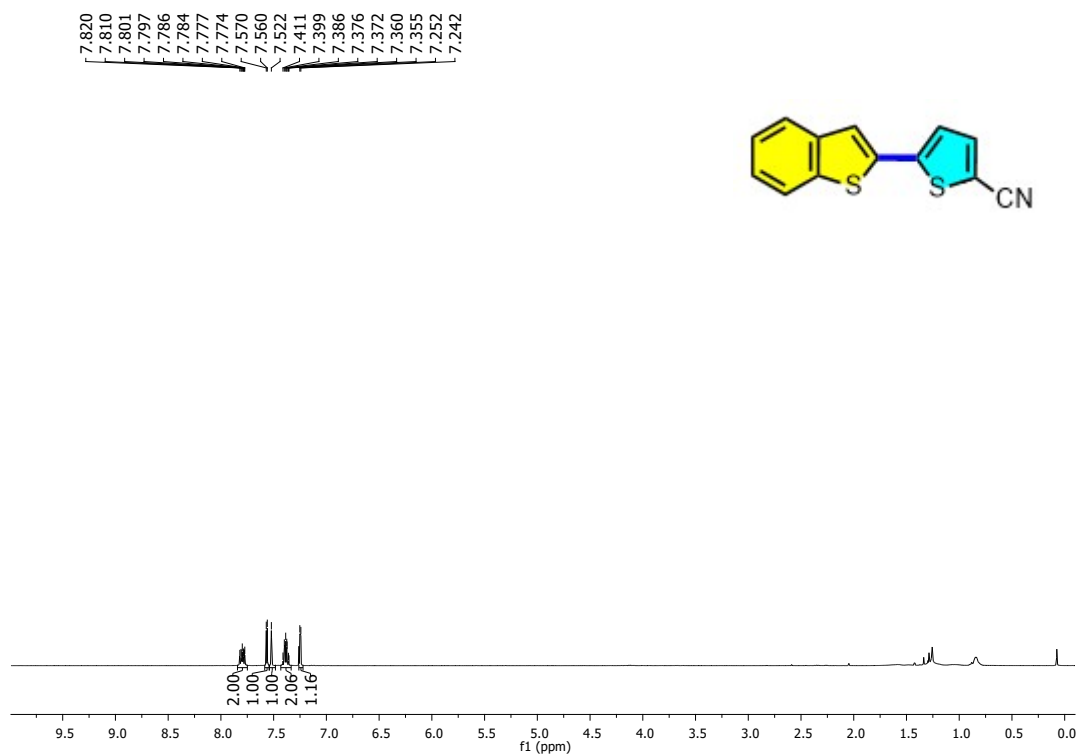

**Figure s69:**  $^1\text{H}$  NMR spectrum of compound **3ib**.

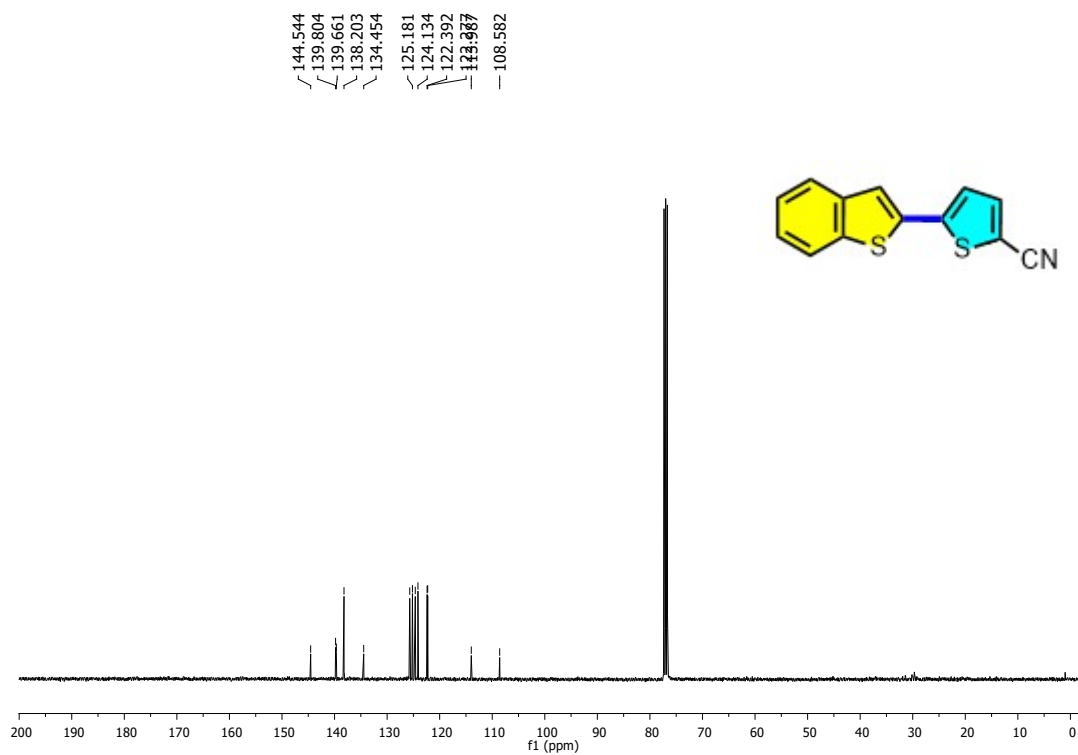

**Figure s70:**  $^{13}\text{C}\{^1\text{H}\}$  NMR spectrum of compound **3ib**.

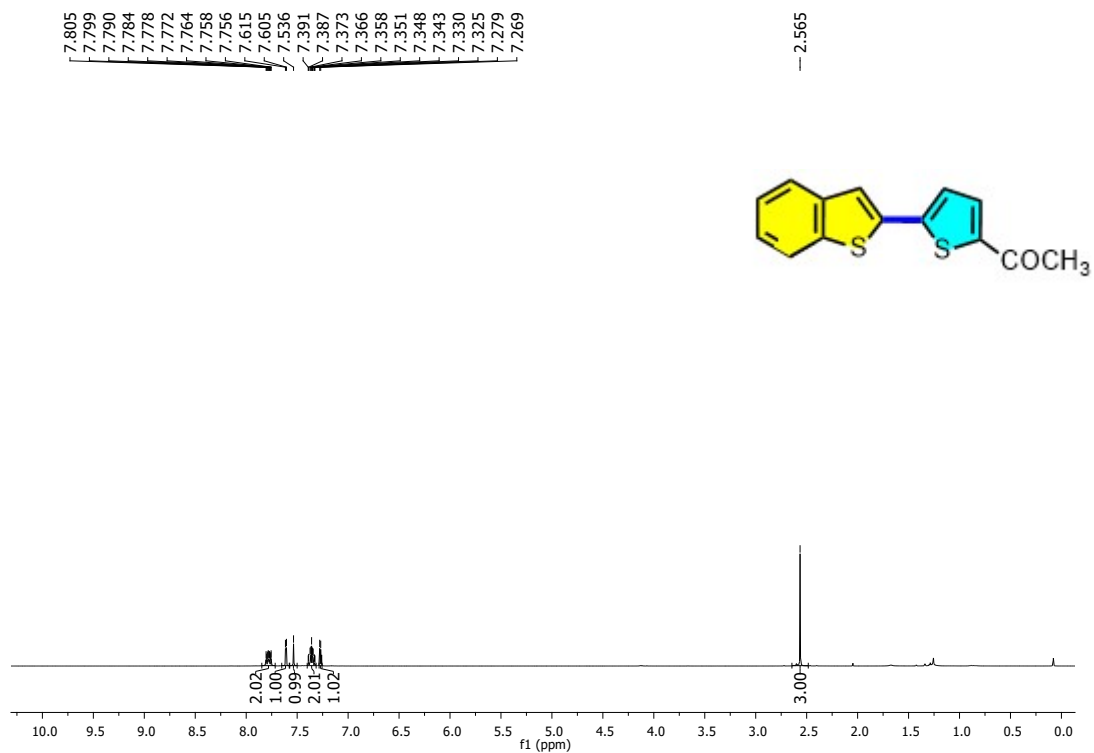

**Figure s71:** <sup>1</sup>H NMR spectrum of compound **3ic**.

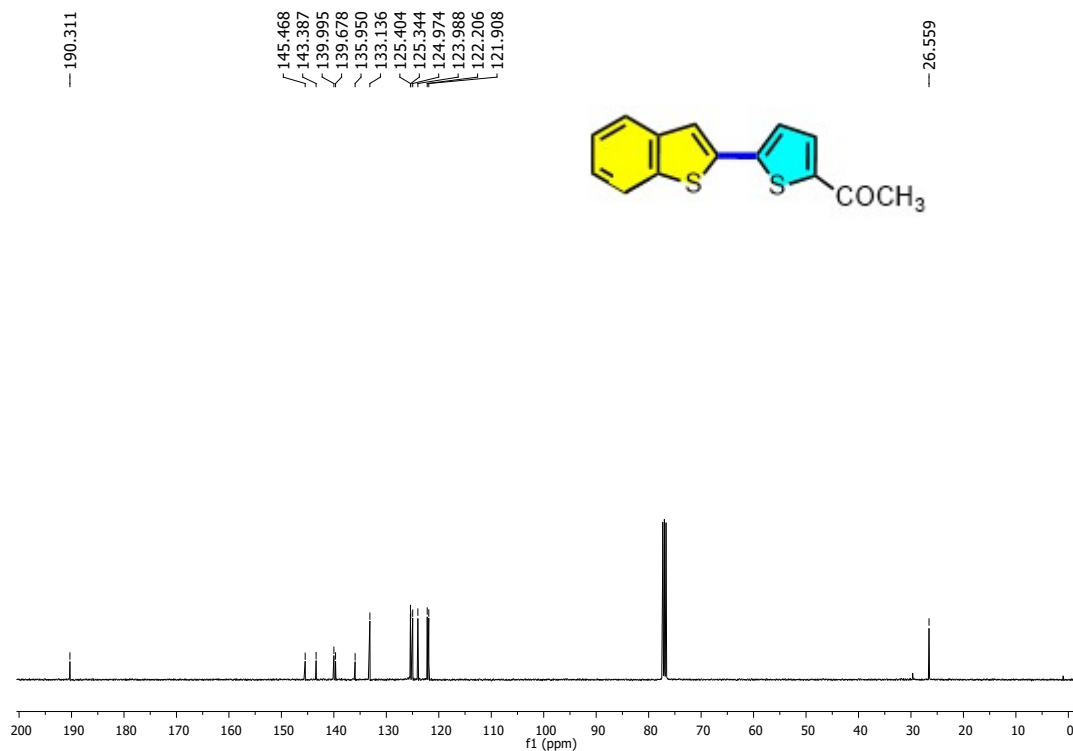

**Figure s72:** <sup>13</sup>C{<sup>1</sup>H} NMR spectrum of compound **3ic**.

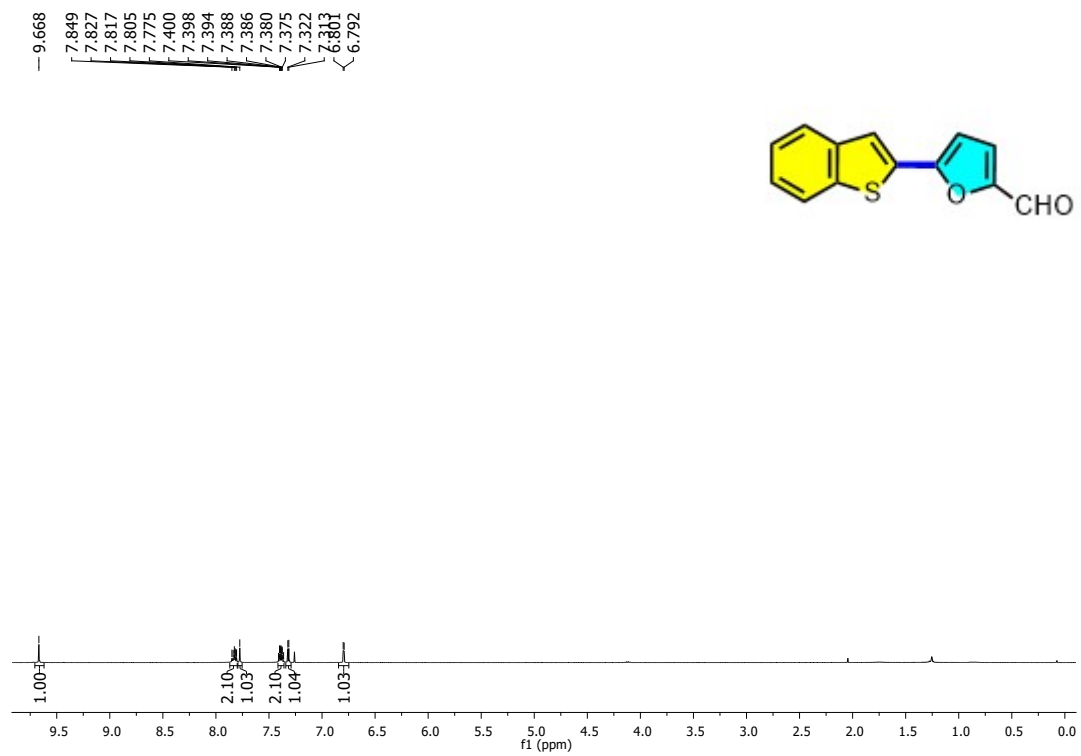

**Figure s73:**  $^1\text{H}$  NMR spectrum of compound **3ig**.

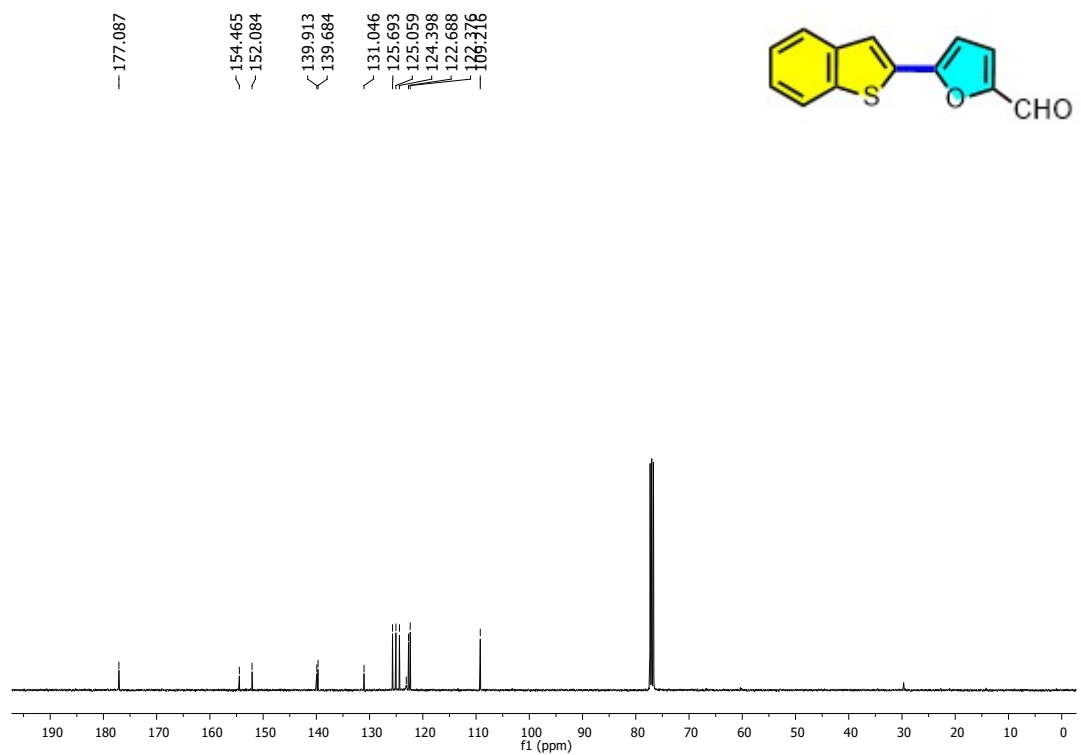

**Figure s74:**  $^{13}\text{C}\{^1\text{H}\}$  NMR spectrum of compound **3ig**.

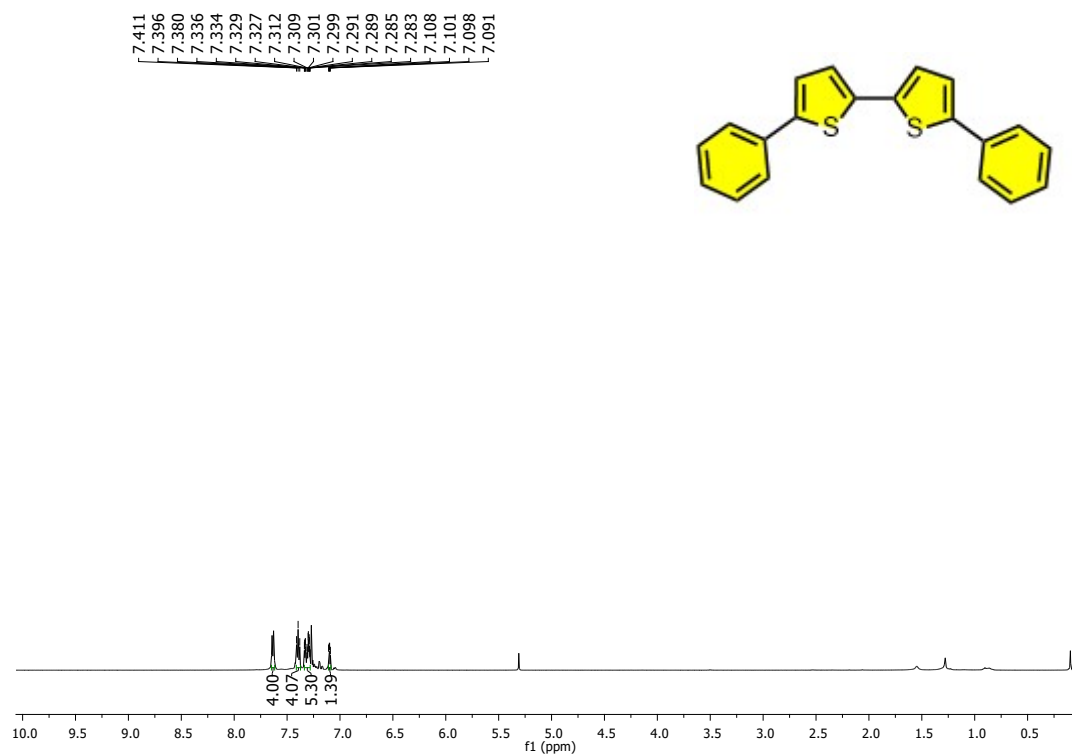

Figure s75: <sup>1</sup>H NMR spectrum of compound 1a'.

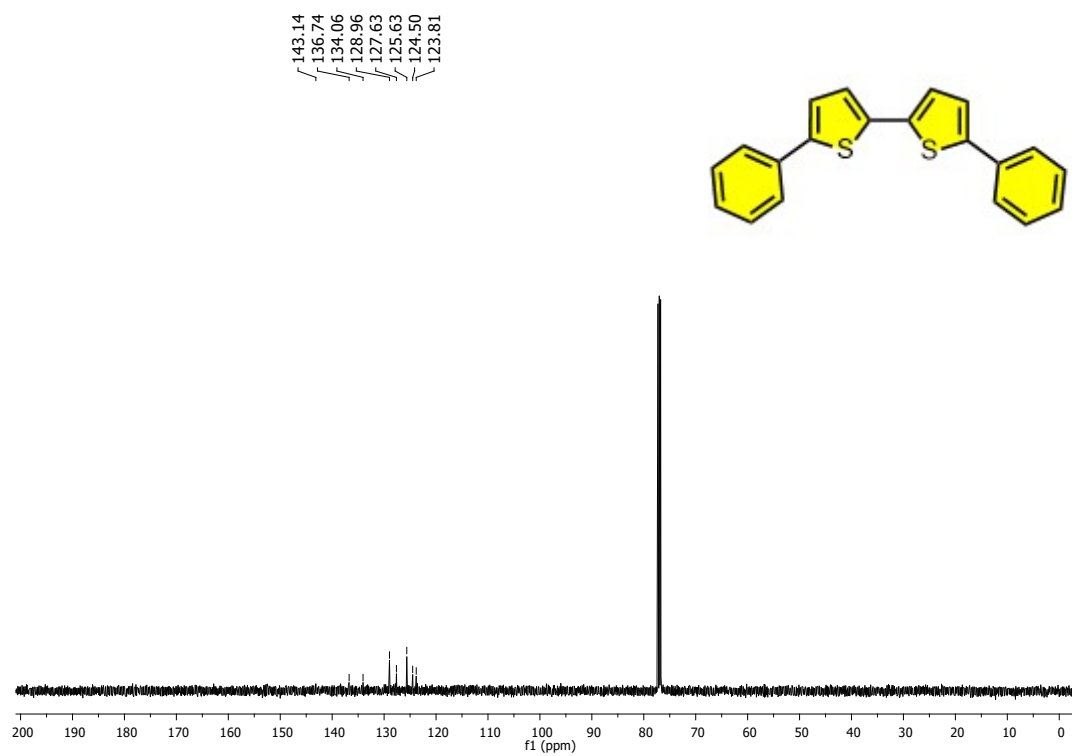

Figure s76: <sup>13</sup>C {<sup>1</sup>H} NMR spectrum of compound 1a.



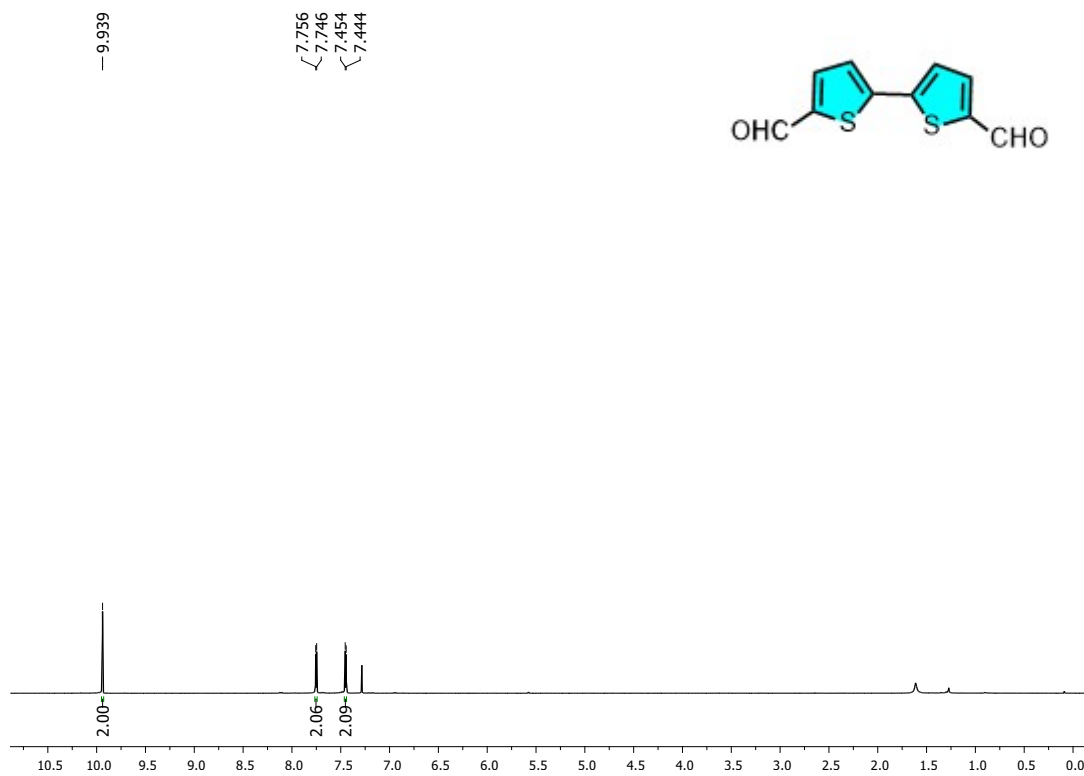

Figure s77:  $^1\text{H}$  NMR spectrum of compound 2a'.

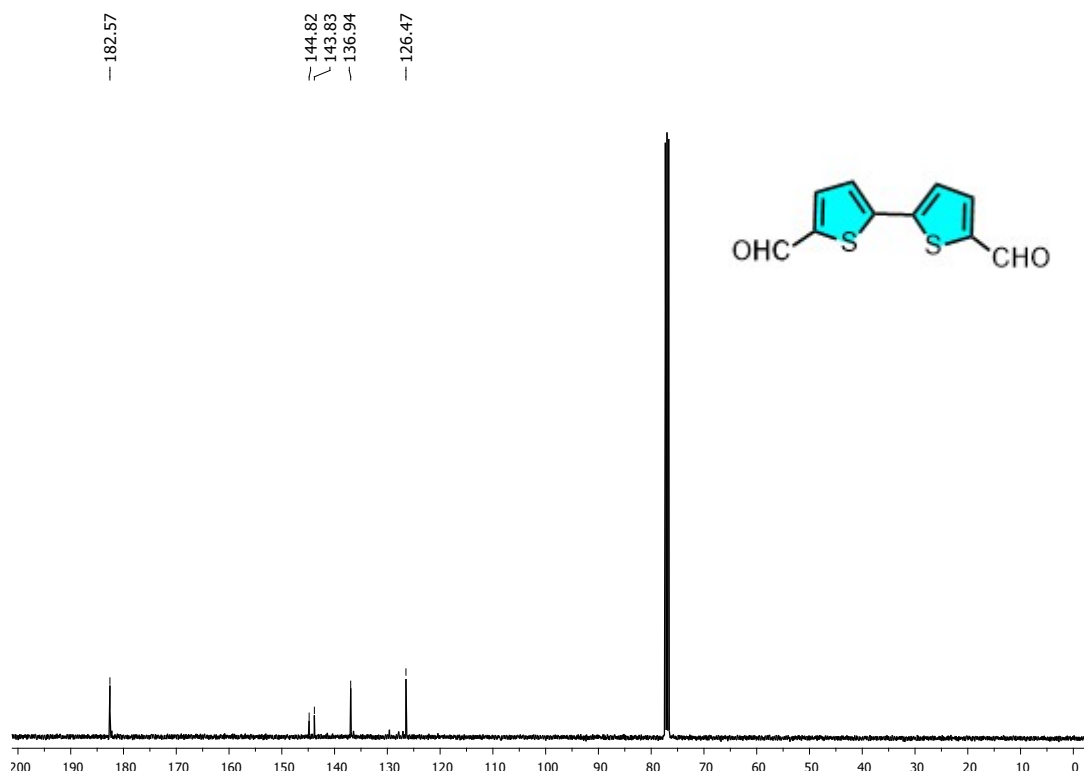

Figure s78:  $^{13}\text{C}\{^1\text{H}\}$  NMR spectrum of compound 2a'.

Compound Spectra

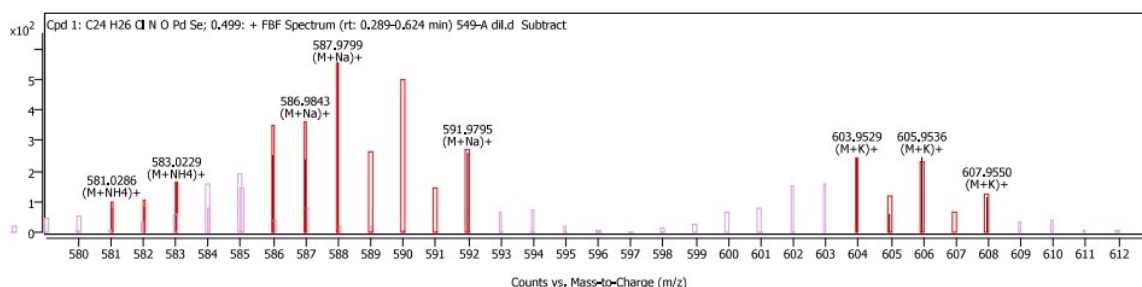

**Figure s79:** HRMS spectrum of Catalyst **C2** showing HRMS (ESI)  $m/z$  cacl'd for: C<sub>24</sub>H<sub>26</sub>ClNOPdSeNa [M+Na]<sup>+</sup> 587.9801, found 587.9799.

Compound Spectra

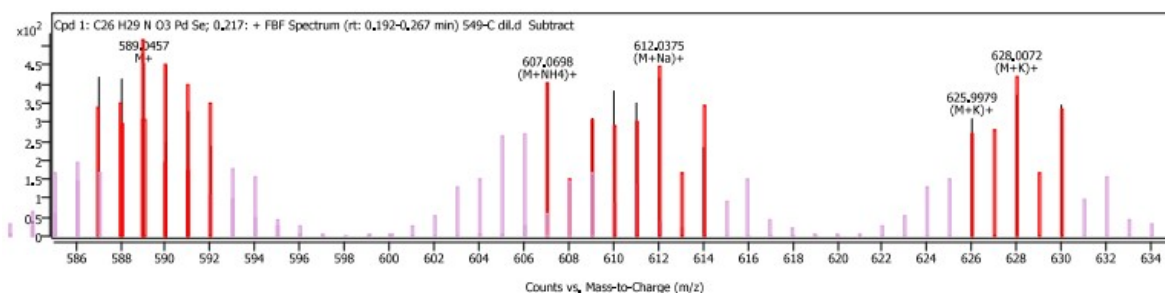

**Figure s80:** HRMS spectrum of intermediate **C3** showing HRMS (ESI)  $m/z$  cacl'd for C<sub>26</sub>H<sub>33</sub>N<sub>2</sub>O<sub>3</sub>PdSe [M+NH<sub>4</sub>]<sup>+</sup> 607.0691, found 607.0698.

Compound Spectra

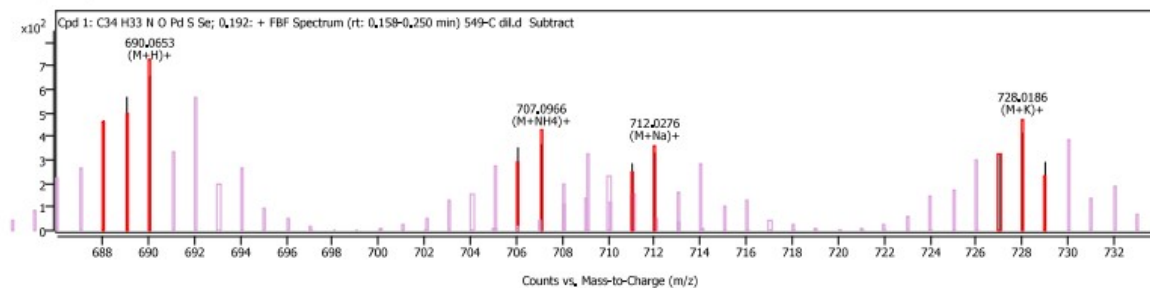

**Figure s81:** HRMS spectrum of intermediate **A** showing HRMS (ESI)  $m/z$  cacl'd for C<sub>34</sub>H<sub>33</sub>NOPdSSeK [M+K]<sup>+</sup> 728.0120, found 728.0186

Compound Spectra

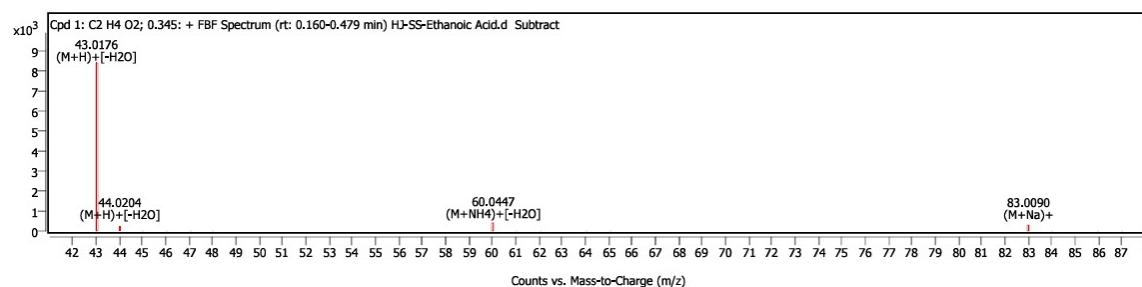

**Figure s82:** HRMS spectrum of intermediate acetyl ion of acetic acid [CH<sub>3</sub>CO]<sup>+</sup> and [M+Na]<sup>+</sup> showing HRMS (ESI)  $m/z$  cacl'd for [CH<sub>3</sub>CO]<sup>+</sup> [CH<sub>3</sub>COOH+H-H<sub>2</sub>O]<sup>+</sup> 43.0184, found 43.0176 and C<sub>2</sub>H<sub>32</sub>OHNa 83.0109, found 83.0090.

Compound Spectra

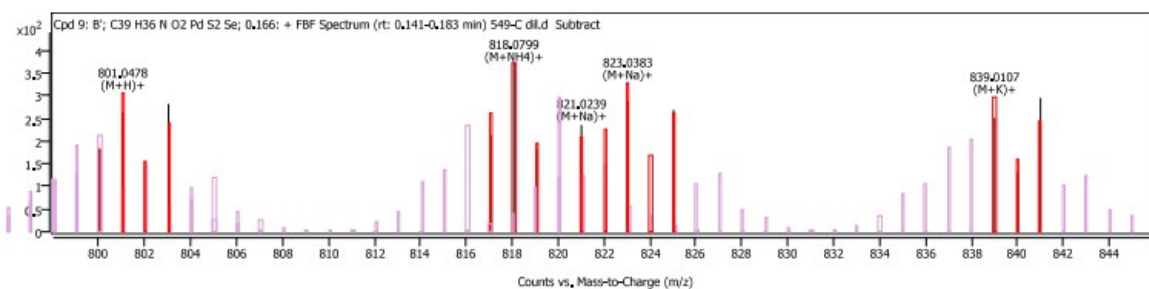

**Figure s83:** HRMS spectrum of intermediate **B** showing HRMS (ESI)  $m/z$  caclcd for C<sub>39</sub>H<sub>38</sub>NO<sub>2</sub>PdS<sub>2</sub>Se [M+H]<sup>+</sup> 801.0466, found 801.0478

Target Screening Report

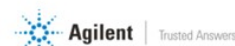

Compound Spectra (overlaid)

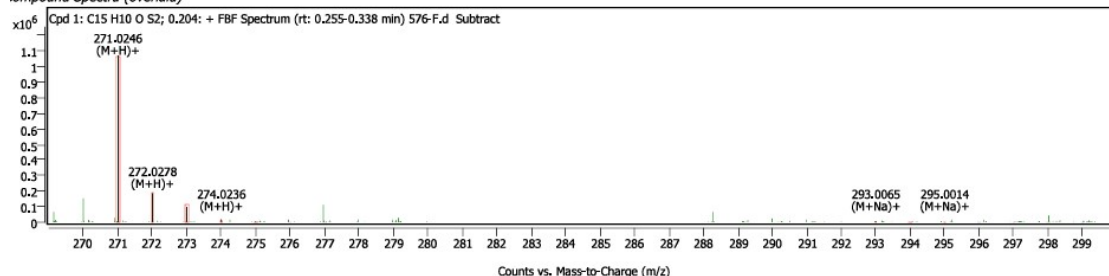

Compound ID Table

| Name | Formula                                          | Species                                   | RT    | RT Diff | Mass     | CAS | ID Source | Score | Score (Lib) | Score (Tgt) |
|------|--------------------------------------------------|-------------------------------------------|-------|---------|----------|-----|-----------|-------|-------------|-------------|
|      | C <sub>15</sub> H <sub>10</sub> O S <sub>2</sub> | (M+H) <sup>+</sup><br>(M+Na) <sup>+</sup> | 0.204 |         | 270.0172 |     | FBF       | 97.95 |             | 97.95       |

**Figure s84:** HRMS spectrum of compound **3aa** showing HRMS (ESI)  $m/z$  caclcd for C<sub>15</sub>H<sub>11</sub>OS<sub>2</sub> [M+H]<sup>+</sup> 271.0251, found 271.0246.

Compound Spectra

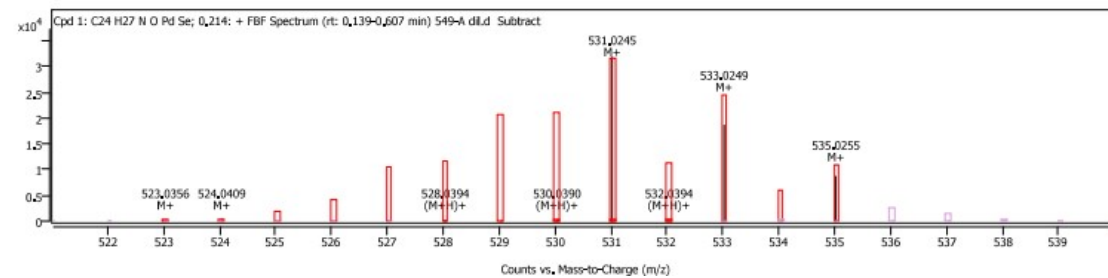

**Figure s85:** HRMS spectrum of intermediate **C** showing HRMS (ESI)  $m/z$  caclcd for C<sub>24</sub>H<sub>27</sub>NOPdSe [M]<sup>+</sup> 532.0371, found 532.0394.

Compound Spectra (overlaid)

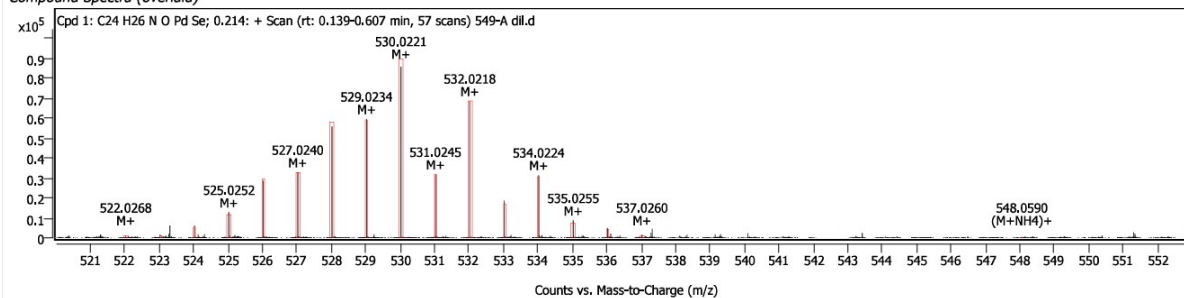

**Figure s86:** HRMS spectrum of intermediate [C]<sup>+</sup> showing HRMS (ESI) *m/z* caclcd for C<sub>24</sub>H<sub>26</sub>NOPdSe [M]<sup>+</sup> 530.0214, found 530.0221.

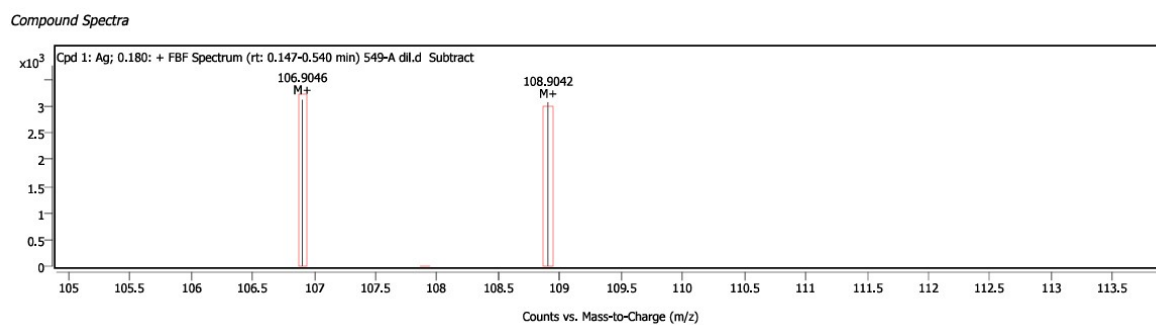

**Figure s87:** HRMS spectrum of intermediate Ag<sup>+</sup> showing HRMS (ESI) *m/z* caclcd for Ag [M]<sup>+</sup> 106.9051, found 106.9046.

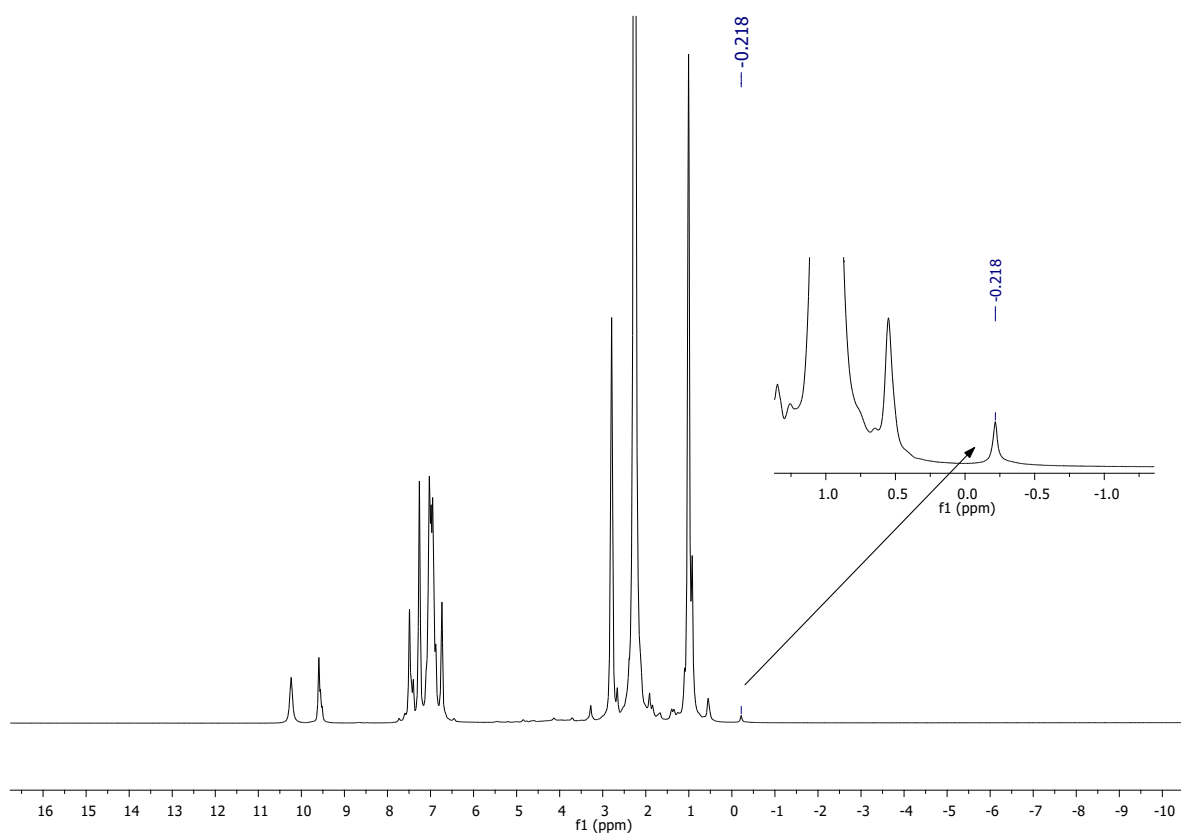

**Figure s88:** <sup>1</sup>H NMR spectrum of reaction mixture showing a peak corresponding to the AgH at  $\delta = -0.218$  ppm.<sup>s25</sup>

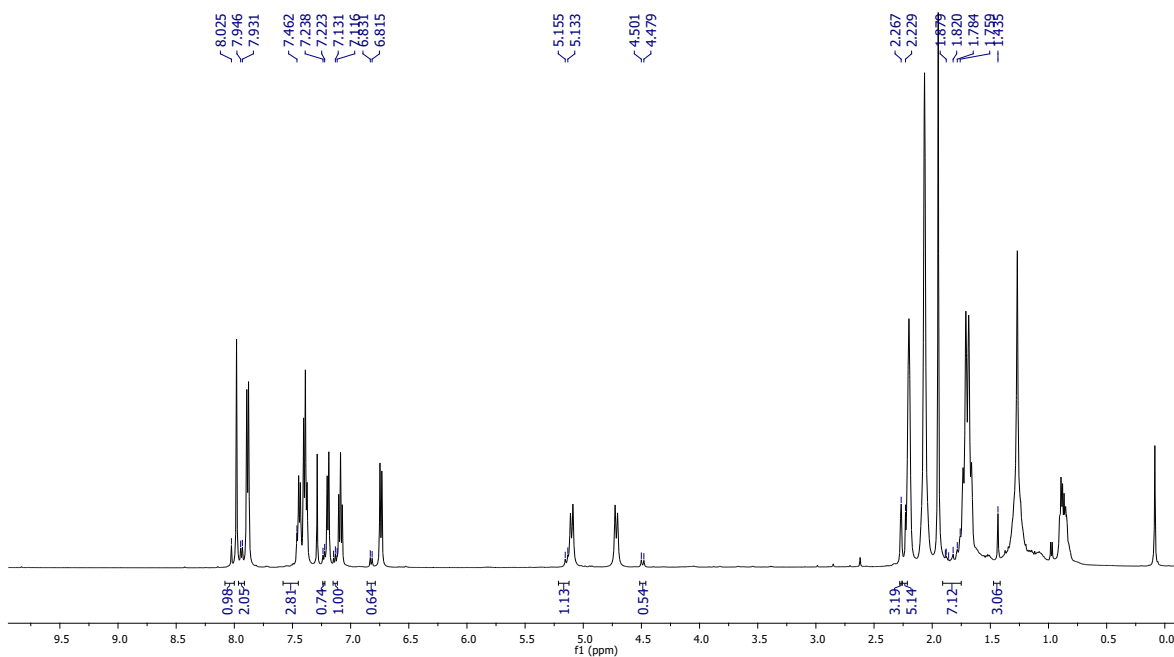

**Figure s89 (a):**  $^1\text{H}$  NMR spectrum of crude reaction mixture between **C2** and AgOAc for synthesizing **C3** (Note: the smaller peaks denotes formation of **C3**).

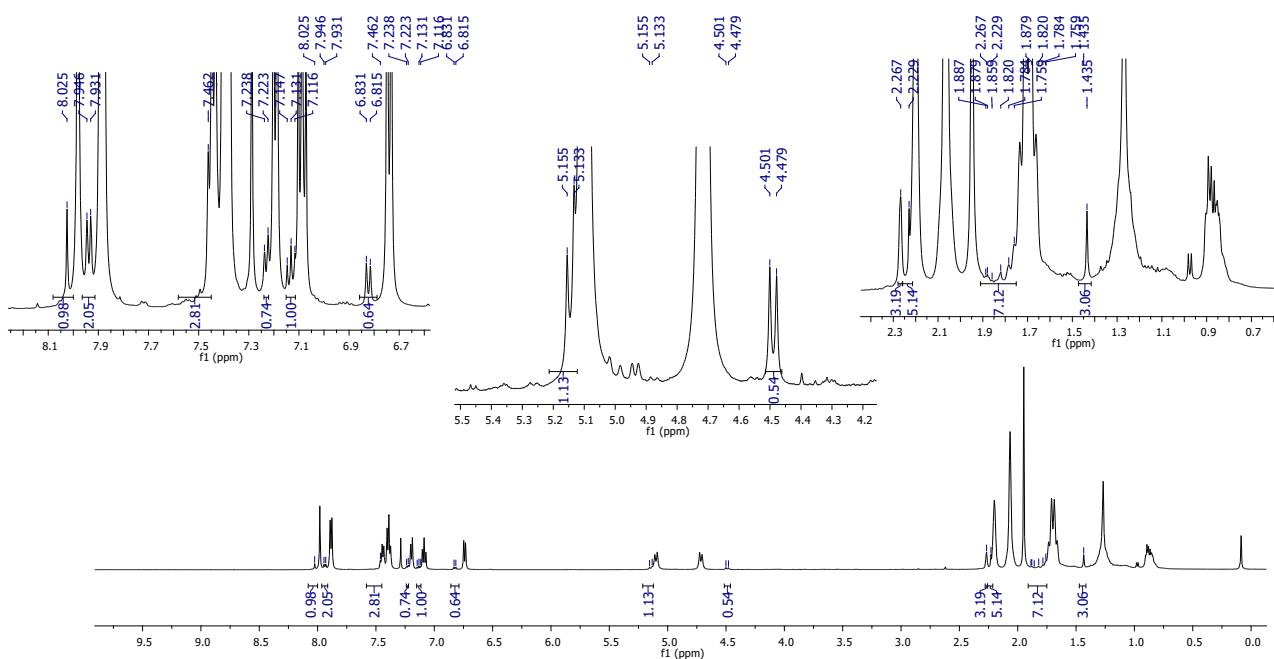

**Figure s89 (b):**  $^1\text{H}$  NMR spectrum (zoomed version) of crude reaction mixture between **C2** and AgOAc for synthesizing **C3** (Note: the smaller peaks denotes formation of **C3**).

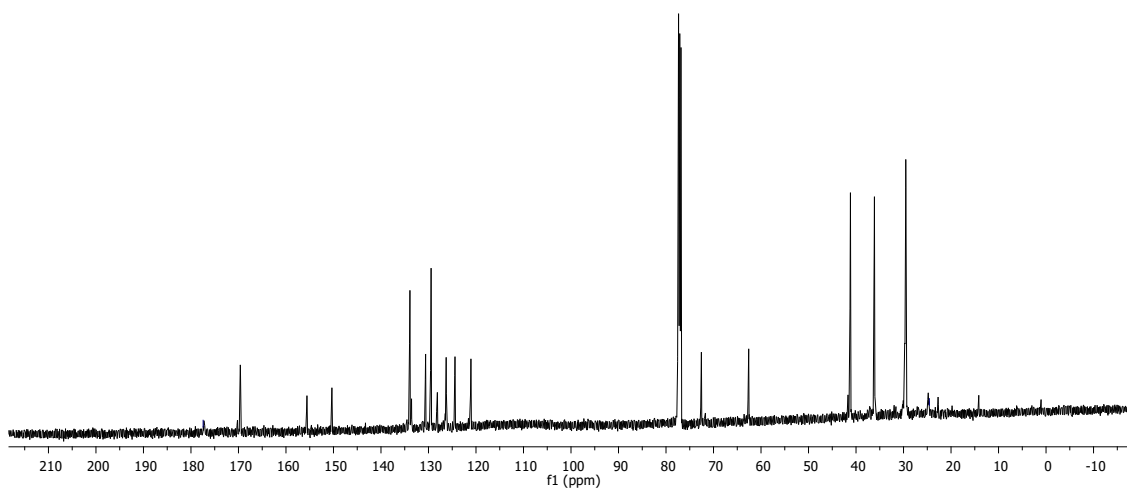

**Figure s90:**  $^{13}\text{C}\{^1\text{H}\}$  spectrum of crude reaction mixture between **C2** and AgOAc for synthesizing **C3** (Note: the smaller peaks denotes formation of **C3**).

## References

- s1. (a) X. Huang, *Synlett*, 1998, **1998**, 1191–1192; (b) A. Beckwith and P. Pigou, *Aust. J. Chem.* 1986, **39**, 77.
- s2. APEX3, Bruker AXS Inc., Madison, WI, USA. Bruker AXS Inc. Madison, WI, USA, 2012.
- s3. SADABS, Sheldrick, G.M. “Program for Absorption Correction of Area Detector Frames,” BRUKER AXS Inc., 5465 East Cheryl Parkway, Madison, WI 53711-5373 USA.
- s4. (a) G. M. S. Sheldrick, *Acta Cryst.* 2008, **A64**, 112-122; (b) G. M. Sheldrick, *Acta Cryst.* 2015, **71**, 3-8.
- s5. A.L. Spek, *J. Appl. Cryst.* 2003, **36**, 7-13. Spek, A. L., Utrecht University, Utrecht, The Netherlands **2008**.
- s6. O. V. Dolomanov, L. J. Bourhis, R. J. Gildea, J. A. K. Howard, H. Puschmann, *J. Appl. Cryst.*, 2009, **42**, 339–341.

- s7. J. L. Bolliger and C. M. Frech, *Chem. Eur. J.*, 2010, **16**, 4075–4081.
- s8. A. Yokooji, T. Satoh, M. Miura and M. Nomura, *Tetrahedron*, 2004, **60**, 6757–6763.
- s9. M. Wakioka, Y. Nakamura, Y. Hihara, F. Ozawa and S. Sakaki, *Organometallics*, 2013, **32**, 4423–4430.
- s10. J. Linshoeft, A. C. J. Heinrich, S. A. W. Segler, P. J. Gates and A. Staubitz, *Org. Lett.*, 2012, **14**, 5644–5647.
- s11. G. Zhang, H. Yi, H. Chen, C. Bian, C. Liu and A. Lei, *Org. Lett.*, 2014, **16**, 6156–6159.
- s12. S. Lin, B. Xu, L. Zhang, M. Guo, S. Li; Z. Lin. And B. Lin, *Antibody probe electrosensing chip comprising conductivity promotion molecules*, August 3, **2011**.
- s13. L. Chen, H. Min, W. Zeng, X. Zhu, Y. Liang, G. Deng and Y. Yang, *Org. Lett.*, 2018, **20**, 7392–7395.
- s14. M. Wakioka, K. Hatakeyama, S. Sakai, T. Seki, K. Tada, Y. Mizuhata, T. Nakazato, S. Koguchi, Y. Shibuya, Y. Maruyama and M. Ayabe, *Organometallics*, 2023, **42**, 3454–3465.
- s15. L. Scapinello, S. Grecchi, S. Rossi, F. Arduini, S. Arnaboldi, A. Penoni, R. Cirilli, P. Romana Mussini and T. Benincori, *Chem. Euro. J.*, 2021, **27**, 13190–13202.
- s16. U. Boas, A. Dhanabalan, D. R. Greve and E. W. Meijer, *Synlett*, 2001, **2001**, 0634–0636.
- s17. L. May, S. Daniel and T. J. J. Müller, *Org. Chem. Front.*, 2020, **7**, 329–339.
- s18. W. Wang, L. Wang, Y. Zhang, Y. Shi, R. Zhang, L. Chen, Z. Shi, S. Yuan, X. Li, C. He and X. Li, *Inorg. Chem.*, 2024, **63**, 7792–7798.
- s19. D. Didier, S. Sergeev and Y. H. Geerts, *Tetrahedron*, 2007, **63**, 941–946.
- s20. N. R. Krishnaswamy, CH. S. S. R. Kumar and S .R. PRASANNA, *ChemInform*, 1991, **22**, 166.
- s21. J. Rühle, M. Rajeevan, K. Shoyama, R. S. Swathi and F. Würthner, *Angew. Chem., Int. Ed.*, 2024, **63**, e202318451.
- s22. S. Kumar, S. Kumari, S. Singh, P. J. Boruah, A. K. Paul, P. Roy and H. Joshi, *ACS Appl. Nano Mater.*, 2022, **5**, 2644–2654.

- s23. M. M. Talukder, J. M. O. Cue, J. T. Miller, P. L. Gamage, A. Aslam, G. T. McCandless, M. C. Biewer and M. C. Stefan, *ACS Omega*, 2020, **5**, 24018–24032.
- s24. S. P, S. C. Sau, P. K. Vardhanapu and S. K. Mandal, *J. Org. Chem.*, 2018, **83**, 9403–9411.
- s25. (a) A. A. Gabrienko, S. S. Arzumanov, I.B. Moroz, A. V. Toktarev, W. Wang, and A. G. Stepanov, *J. Phys. Chem. C*, 2013, **117**, 7690-7702; (b) T. Baba, N. Komatsu, H. Sawada, Y. Yamaguchi, T. Takahashi, H. Sugisawa and Y. Ono, *Langmuir*, 1999, **15**, 7894–7896.
